# Supplementary material for: Early and dynamic changes in gene expression in septic shock patients: a genome-wide approach
Source: PubMed Central journal article supplement (PMC4512996; doi:10.1186/s40635-014-0020-3), 2014-08-20

Figure S1. Comparison of gene expression patterns of the 142 probesets differentially expressed (FDR <0.05) between both group of septic shock patients. Expression at 0, 24 and 48 hours after septic shock of genes in each of the 14 clusters from hierarchical clustering in Fig. 6.

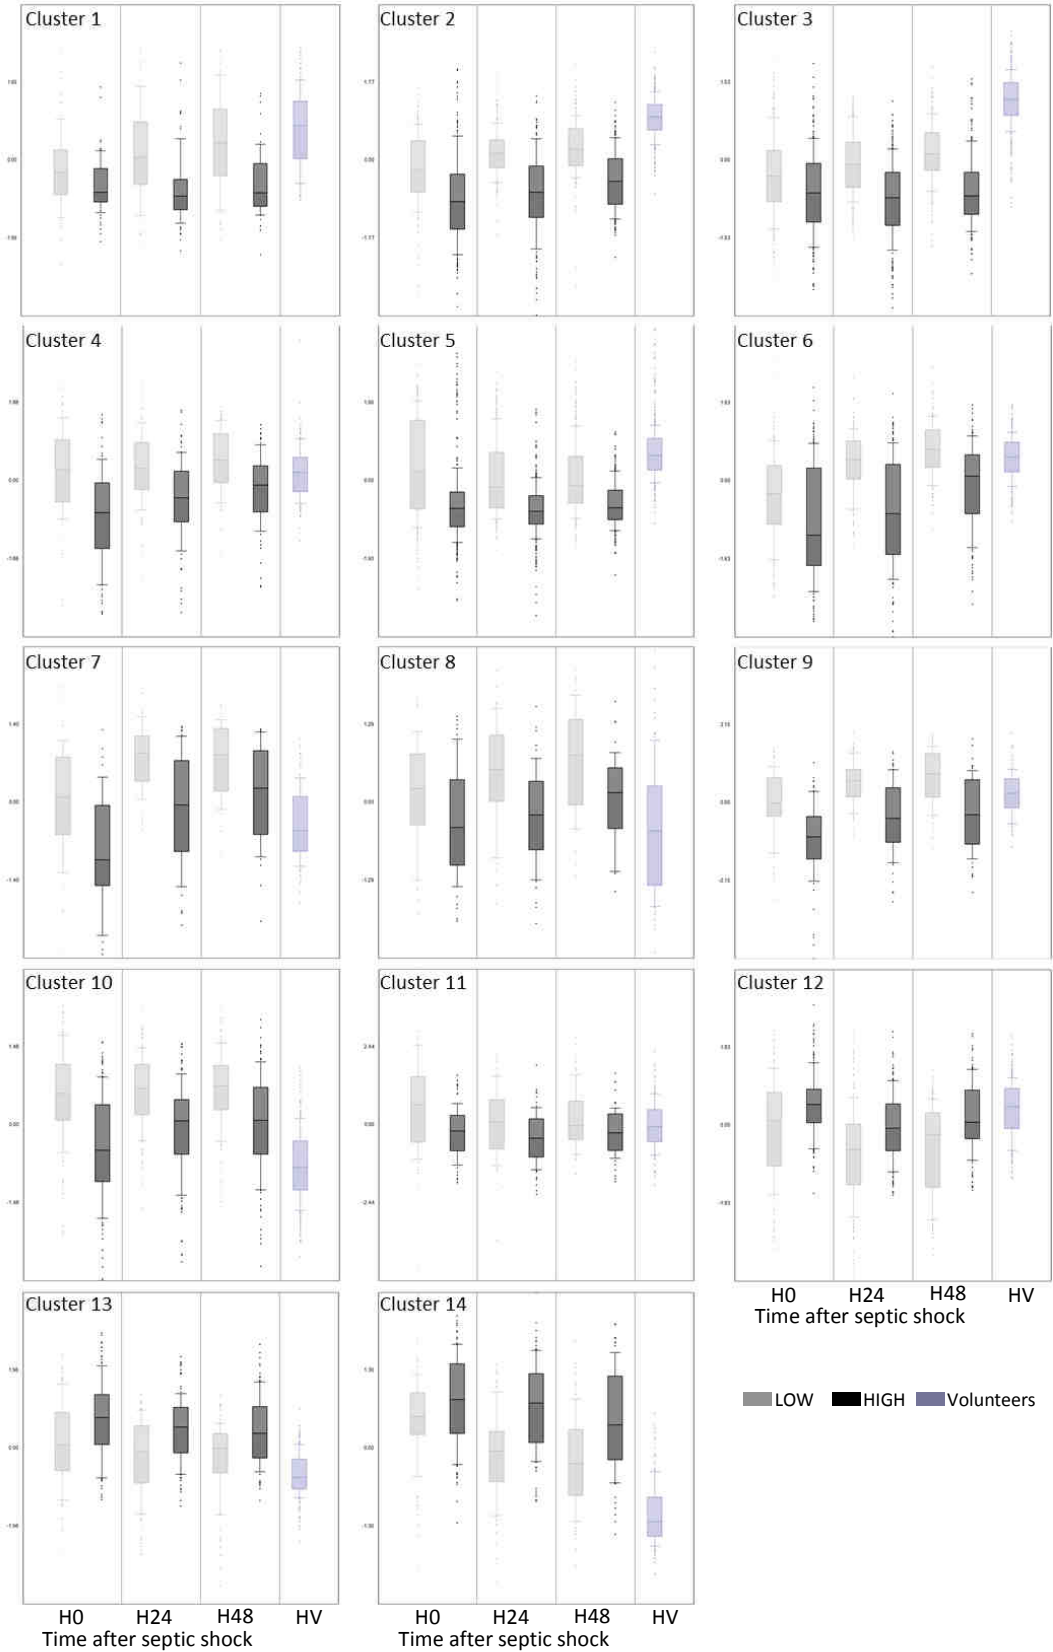

Supplement: 40635_2014_20_MOESM2_ESM.pdf [file 40635_2014_20_MOESM2_ESM.pdf]
