# Supplementary material for: Early and dynamic changes in gene expression in septic shock patients: a genome-wide approach
Source: PubMed Central journal article supplement (PMC4512996; doi:10.1186/s40635-014-0020-3), 2014-08-20
Supplement: 40635_2014_20_MOESM3_ESM.pdf [file 40635_2014_20_MOESM3_ESM.pdf]

**Supplementary Table 1:** Modulation over the first 48h of septic shock for selected genes highlighted by the functional analysis.

| genes    | H0    | H24   | H48   |
|----------|-------|-------|-------|
| CD247    | -5.46 | -6.55 | -5.55 |
| CD3D     | -2.64 | -2.56 | -2.08 |
| CD3E     | -4.01 | -4.21 | -3.47 |
| CD3G     | -3.51 | -3.20 | -2.45 |
| CD74     | -2.24 | -4.0  | -2.27 |
| CIITA    | -2.38 | -2.51 | -2.33 |
| CIITA    | -2.38 | -2.51 | -2.33 |
| HLA-DMA  | -3.61 | -3.14 | -2.58 |
| HLA-DMB  | -4.43 | -3.14 | -2.88 |
| HLA-DOA  | -2.75 | -2.67 | -2.28 |
| HLA-DOB  | -2.62 | -2.61 | -2.17 |
| HLA-DPA1 | -4.54 | -4.96 | -4.16 |
| HLA-DPB1 | -4.17 | -4.21 | -3.73 |
| HLA-DQA1 | -3.45 | -5.19 | -3.14 |
| HLA-DRA  | -2.49 | -2.96 | -2.44 |
| HLA-DRB1 | -2.81 | -3.35 | -2.40 |
| IFNGR1   | 2.21  | 2.68  | 2.3   |
| IL10     | 2.41  | 1.99  | 1.61  |
| IL18     | 1.85  | 2.17  | 2.25  |
| IL18RAP  | 4.53  | 4.91  | 4.05  |
| IL1R1    | 3.52  | 6.16  | 4.74  |
| IL1R2    | 9.84  | 17.06 | 9.54  |
| IL1RAP   | 2.173 | NA    | NA    |
| IL1RN    | 2.09  | 1.56  | 1.76  |
| IL4R     | 2.25  | 1.81  | 1.89  |
| IRAK3    | 6.12  | 7.73  | 6.62  |
| JAK2     | 2.46  | 2.32  | 2.07  |
| JAK3     | 2.36  | 1.43  | 1.4   |
| LY96     | 2.43  | 2.99  | 3.11  |
| MAP2K6   | 2.79  | 2.9   | 2.33  |
| MAPK1    | -1.19 | 2.0   | 1.41  |
| MAPK14   | 3.64  | 3.49  | 2.91  |
| MMP9     | 8.2   | 7.51  | 6.75  |
| NFKBIA   | 1.78  | 2.01  | 1.89  |
| S100A8   | 2.26  | 2.24  | 2.11  |
| SOCS3    | 2.73  | 3.25  | 2.57  |
| TAP2     | -2.28 | -2.21 | -2.10 |
| TGFBR1   | 2.15  | 2.06  | 1.38  |
