# Supplementary material for: Early and dynamic changes in gene expression in septic shock patients: a genome-wide approach
Source: PubMed Central journal article supplement (PMC4512996; doi:10.1186/s40635-014-0020-3), 2014-08-20
Supplement: 40635_2014_20_MOESM4_ESM.pdf [file 40635_2014_20_MOESM4_ESM.pdf]

**Table S2. Significant category in septic shock patients over time compared to Healthy volunteers. The table shows the predicted activation or inhibition status of the enriched functions**

© 2000-2012 Ingenuity Systems, Inc. All rights reserved.

| Category               | Functions Annotation                          | p-Value  | Predicted Activation State | Regulation z-score | # Molecules |
|------------------------|-----------------------------------------------|----------|----------------------------|--------------------|-------------|
| Inflammatory Response  | immune response                               | 6,67E-32 |                            | -0,35              | 316         |
| Inflammatory Response  | activation of leukocytes                      | 2,94E-25 |                            | -1,92              | 154         |
| Inflammatory Response  | activation of mononuclear leukocytes          | 4,29E-18 | Decreased                  | -2,82              | 110         |
| Inflammatory Response  | activation of lymphocytes                     | 5,42E-17 | Decreased                  | -2,56              | 104         |
| Inflammatory Response  | activation of T lymphocytes                   | 8,77E-17 | Decreased                  | -2,37              | 87          |
| Inflammatory Response  | inflammatory response                         | 5,95E-15 |                            | 1,69               | 141         |
| Inflammatory Response  | inflammation                                  | 9,12E-12 |                            | -0,15              | 117         |
| Inflammatory Response  | cell movement of phagocytes                   | 3,51E-10 |                            | 0,16               | 98          |
| Inflammatory Response  | cell-mediated response                        | 1,40E-08 |                            | -1,23              | 42          |
| Inflammatory Response  | chemotaxis of phagocytes                      | 2,71E-08 |                            | 1,23               | 57          |
| Inflammatory Response  | immune response of cells                      | 3,48E-08 |                            | 1,68               | 50          |
| Inflammatory Response  | activation of phagocytes                      | 3,55E-08 |                            | 0,31               | 60          |
| Inflammatory Response  | activation of myeloid cells                   | 4,09E-08 |                            | 0,46               | 52          |
| Inflammatory Response  | cell movement of neutrophils                  | 7,36E-08 |                            | 0,84               | 58          |
| Inflammatory Response  | chemotaxis of neutrophils                     | 2,40E-07 |                            | 1,76               | 37          |
| Inflammatory Response  | recruitment of neutrophils                    | 2,44E-07 |                            | 1,54               | 36          |
| Inflammatory Response  | chemotaxis of granulocytes                    | 3,23E-07 |                            | 0,69               | 42          |
| Inflammatory Response  | quantity of phagocytes                        | 6,14E-07 | Decreased                  | -2,45              | 71          |
| Inflammatory Response  | chemotaxis of leukocytes                      | 6,58E-07 |                            | 0,82               | 63          |
| Inflammatory Response  | recruitment of phagocytes                     | 1,26E-06 |                            | 1,24               | 42          |
| Inflammatory Response  | degranulation of cells                        | 1,37E-06 |                            | 0,46               | 39          |
| Inflammatory Response  | antibody response                             | 2,40E-06 |                            | -1,45              | 35          |
| Inflammatory Response  | activation of antigen presenting cells        | 2,51E-06 |                            | -0,63              | 45          |
| Inflammatory Response  | accumulation of leukocytes                    | 2,86E-06 |                            | 0,11               | 45          |
| Inflammatory Response  | chemotaxis of myeloid cells                   | 4,37E-06 |                            | 0,97               | 50          |
| Inflammatory Response  | migration of phagocytes                       | 6,18E-06 |                            | -0,70              | 49          |
| Inflammatory Response  | antimicrobial response                        | 6,40E-06 |                            | -0,78              | 38          |
| Inflammatory Response  | accumulation of myeloid cells                 | 1,28E-05 |                            | 0,02               | 31          |
| Inflammatory Response  | migration of neutrophils                      | 1,35E-05 |                            | -0,16              | 25          |
| Inflammatory Response  | quantity of neutrophils                       | 2,16E-05 |                            | -0,82              | 39          |
| Inflammatory Response  | phagocytosis of cells                         | 3,74E-05 | Increased                  | 2,34               | 35          |
| Inflammatory Response  | phagocytosis                                  | 4,38E-05 | Increased                  | 2,05               | 42          |
| Inflammatory Response  | accumulation of phagocytes                    | 1,05E-04 |                            | 0,12               | 25          |
| Inflammatory Response  | immune response of tumor cell lines           | 1,36E-04 |                            | 1,20               | 19          |
| Inflammatory Response  | degranulation of phagocytes                   | 1,65E-04 |                            | 0,79               | 25          |
| Inflammatory Response  | TH1 immune response                           | 1,93E-04 |                            | -1,17              | 16          |
| Inflammatory Response  | accumulation of T lymphocytes                 | 1,99E-04 |                            | -0,21              | 17          |
| Inflammatory Response  | antibody-dependent cell-mediated cytotoxicity | 2,00E-04 |                            | -0,60              | 11          |
| Inflammatory Response  | response of phagocytes                        | 2,00E-04 |                            | 1,64               | 34          |
| Inflammatory Response  | function of immune system                     | 2,29E-04 |                            |                    | 20          |
| Inflammatory Response  | activation of macrophages                     | 2,50E-04 |                            | 0,00               | 29          |
| Inflammatory Response  | quantity of blood platelets                   | 2,61E-04 |                            | -0,04              | 23          |
| Inflammatory Response  | inflammation of organ                         | 2,71E-04 |                            | -0,72              | 67          |
| Amino Acid Metabolism  | phosphorylation of L-amino acid               | 1,06E-05 |                            | -0,48              | 37          |
| Amino Acid Metabolism  | phosphorylation of L-tyrosine                 | 8,33E-05 |                            | -0,38              | 28          |
| Antigen Presentation   | chemotaxis of phagocytes                      | 2,71E-08 |                            | 1,23               | 57          |
| Antigen Presentation   | activation of phagocytes                      | 3,55E-08 |                            | 0,31               | 60          |
| Antigen Presentation   | chemotaxis of neutrophils                     | 2,40E-07 |                            | 1,76               | 37          |
| Antigen Presentation   | activation of antigen presenting cells        | 2,51E-06 |                            | -0,63              | 45          |
| Antigen Presentation   | function of macrophages                       | 1,53E-05 |                            |                    | 36          |
| Antigen Presentation   | activation of macrophages                     | 2,50E-04 |                            | 0,00               | 29          |
| Antimicrobial Response | antimicrobial response                        | 6,40E-06 |                            | -0,78              | 38          |
| Cancer                 | neoplasia                                     | 5,60E-19 |                            | 1,68               | 555         |
| Cancer                 | cancer                                        | 1,41E-18 |                            | 1,68               | 543         |
| Cancer                 | tumorigenesis                                 | 2,01E-17 |                            | 0,75               | 594         |
| Cancer                 | carcinoma                                     | 1,12E-15 |                            | 1,29               | 443         |
| Cancer                 | solid tumor                                   | 1,97E-15 |                            | 1,24               | 449         |
| Cancer                 | hematological neoplasia                       | 1,14E-10 |                            | -0,11              | 142         |
| Cancer                 | genital tumor                                 | 1,94E-09 |                            | 0,66               | 152         |
| Cancer                 | colorectal cancer                             | 3,23E-08 |                            | -0,59              | 141         |

|                                |                                                 |          |       |     |
|--------------------------------|-------------------------------------------------|----------|-------|-----|
| Cancer                         | colorectal tumor                                | 3,24E-08 | -0,59 | 142 |
| Cancer                         | gastrointestinal tract cancer                   | 4,66E-08 | -0,54 | 159 |
| Cancer                         | lymphomagenesis                                 | 5,44E-08 | -0,28 | 77  |
| Cancer                         | lymphoid cancer                                 | 5,93E-08 | -0,28 | 78  |
| Cancer                         | lymphatic node tumor                            | 8,08E-08 | 0,15  | 62  |
| Cancer                         | non-Hodgkin's disease                           | 8,83E-08 | 0,15  | 60  |
| Cancer                         | digestive organ tumor                           | 9,77E-08 | 0,27  | 218 |
| Cancer                         | adenocarcinoma                                  | 1,31E-07 | 0,95  | 134 |
| Cancer                         | renal cancer                                    | 1,31E-07 |       | 61  |
| Cancer                         | B-cell non-Hodgkin's disease                    | 4,68E-07 | 0,28  | 38  |
| Cancer                         | growth of tumor                                 | 6,05E-07 | -0,62 | 60  |
| Cancer                         | lymphocytic leukemia                            | 1,09E-06 |       | 42  |
| Cancer                         | lung adenocarcinoma                             | 1,62E-06 | -0,14 | 32  |
| Cancer                         | mammary tumor                                   | 2,85E-06 | -1,30 | 153 |
| Cancer                         | prostate cancer                                 | 3,81E-06 | -0,19 | 84  |
| Cancer                         | B-cell leukemia                                 | 4,24E-06 |       | 29  |
| Cancer                         | prostatic tumor                                 | 4,56E-06 | -0,32 | 85  |
| Cancer                         | leukemia                                        | 7,03E-06 | 0,06  | 62  |
| Cancer                         | metastasis                                      | 7,83E-06 | 1,16  | 81  |
| Cancer                         | gonadal tumor                                   | 9,15E-06 | 1,08  | 81  |
| Cancer                         | tumorigenesis of B-cell non-Hodgkin lymphon     | 1,17E-05 | 0,32  | 16  |
| Cancer                         | diffuse large B-cell lymphoma                   | 1,18E-05 |       | 12  |
| Cancer                         | development of malignant tumor                  | 1,62E-05 | 1,03  | 23  |
| Cancer                         | uterine serous papillary cancer                 | 1,63E-05 |       | 50  |
| Cancer                         | hematologic cancer                              | 1,78E-05 | 0,27  | 87  |
| Cancer                         | head and neck cancer                            | 2,52E-05 | 1,40  | 87  |
| Cancer                         | squamous cell tumor                             | 2,71E-05 | 1,19  | 56  |
| Cancer                         | thyroid carcinoma                               | 2,92E-05 |       | 23  |
| Cancer                         | endometrial cancer                              | 3,46E-05 |       | 64  |
| Cancer                         | endometrial carcinoma                           | 3,56E-05 |       | 68  |
| Cancer                         | tumorigenesis of non-Hodgkin lymphoma           | 4,20E-05 | -0,23 | 17  |
| Cancer                         | squamous-cell carcinoma                         | 6,04E-05 | 1,19  | 52  |
| Cancer                         | cell transformation                             | 6,34E-05 | 0,72  | 78  |
| Cancer                         | tumorigenesis of lymphoma                       | 7,45E-05 | -0,40 | 22  |
| Cancer                         | uterine cancer                                  | 8,84E-05 |       | 107 |
| Cancer                         | chronic B-cell leukemia                         | 8,90E-05 |       | 22  |
| Cancer                         | breast cancer                                   | 9,17E-05 | 0,57  | 133 |
| Cancer                         | differentiated thyroid cancer                   | 9,26E-05 |       | 20  |
| Cancer                         | tumorigenesis of thymus gland                   | 1,07E-04 | -1,00 | 4   |
| Cancer                         | development of tumor                            | 1,13E-04 | 0,57  | 35  |
| Cancer                         | metastasis of tumor                             | 1,19E-04 | 1,01  | 23  |
| Cancer                         | thyroid cancer                                  | 1,22E-04 |       | 31  |
| Cancer                         | hyperplasia of exocrine cells                   | 1,67E-04 | 0,24  | 9   |
| Cancer                         | papillary carcinoma                             | 2,18E-04 |       | 21  |
| Cancer                         | chronic leukemia                                | 2,21E-04 |       | 29  |
| Cancer                         | carcinoma in situ                               | 2,24E-04 |       | 34  |
| Cancer                         | transformation                                  | 2,39E-04 | 0,88  | 83  |
| Cancer                         | quantity of tumor                               | 2,41E-04 | 1,11  | 22  |
| Cancer                         | papillary thyroid cancer                        | 2,44E-04 |       | 17  |
| Cancer                         | liver cancer                                    | 2,72E-04 | 0,49  | 69  |
| Cancer                         | incidence of tumor                              | 2,98E-04 | 0,57  | 46  |
| Cancer                         | diffuse B-cell lymphoma                         | 3,03E-04 |       | 13  |
| Cardiovascular Disease         | ischemic stroke                                 | 1,95E-06 |       | 15  |
| Cardiovascular Disease         | brain ischemia                                  | 3,21E-06 |       | 16  |
| Cardiovascular Disease         | cerebrovascular dysfunction                     | 1,23E-05 |       | 19  |
| Cardiovascular Disease         | myocarditis                                     | 1,79E-05 | 0,64  | 12  |
| Cardiovascular Disease         | infarction                                      | 1,33E-04 | 0,77  | 46  |
| Cardiovascular Disease         | vascular disease                                | 2,09E-04 | 0,96  | 94  |
| Cardiovascular Disease         | carditis                                        | 2,65E-04 | 0,20  | 14  |
| Cardiovascular Disease         | vascular lesion                                 | 3,21E-04 | -1,00 | 31  |
| Cardiovascular System Developm | mitosis of cardiomyocytes                       | 1,09E-05 | 0,36  | 5   |
| Cell Cycle                     | arrest in interphase                            | 1,63E-06 |       | 71  |
| Cell Cycle                     | cell cycle progression                          | 3,39E-06 | 0,76  | 158 |
| Cell Cycle                     | arrest in cell cycle progression                | 9,45E-06 |       | 59  |
| Cell Cycle                     | mitosis of cardiomyocytes                       | 1,09E-05 | 0,36  | 5   |
| Cell Cycle                     | arrest in G2/M phase transition                 | 1,17E-05 |       | 16  |
| Cell Cycle                     | arrest in cell cycle progression of lymphocyte: | 2,38E-05 |       | 9   |

|            |                                                 |          |           |       |     |
|------------|-------------------------------------------------|----------|-----------|-------|-----|
| Cell Cycle | arrest in cell cycle progression of blood cells | 2,38E-05 |           |       | 10  |
| Cell Cycle | G1 phase of lymphoma cell lines                 | 3,79E-05 |           |       | 8   |
| Cell Cycle | cell division process of chromosomes            | 4,09E-05 |           | 0,95  | 46  |
| Cell Cycle | G1 phase of brain cancer cell lines             | 7,07E-05 |           |       | 6   |
| Cell Cycle | arrest in interphase of connective tissue cells | 7,70E-05 |           |       | 13  |
| Cell Cycle | arrest in cell cycle progression of thymocytes  | 1,07E-04 |           |       | 4   |
| Cell Cycle | G2 phase of fibroblasts                         | 1,08E-04 |           |       | 9   |
| Cell Cycle | cell cycle progression of blood cells           | 1,12E-04 |           | 1,32  | 19  |
| Cell Cycle | arrest in interphase of fibroblasts             | 1,45E-04 |           |       | 12  |
| Cell Cycle | interphase of connective tissue cells           | 1,65E-04 |           | 0,83  | 18  |
| Cell Cycle | G1 phase                                        | 1,86E-04 |           | 0,64  | 63  |
| Cell Cycle | arrest in cell cycle progression of hematopoie  | 1,92E-04 |           |       | 5   |
| Cell Cycle | mitosis of muscle cells                         | 1,95E-04 |           | 0,12  | 8   |
| Cell Cycle | interphase of brain cancer cell lines           | 1,95E-04 |           | 1,21  | 8   |
| Cell Cycle | delay in mitosis of tumor cell lines            | 2,02E-04 |           | -1,60 | 7   |
| Cell Cycle | cell cycle progression of lymphocytes           | 2,65E-04 |           | 1,39  | 14  |
| Cell Cycle | arrest in G1 phase                              | 3,12E-04 |           |       | 43  |
| Cell Death | cell death of immune cells                      | 6,14E-23 | Increased | 2,33  | 150 |
| Cell Death | cell death of blood cells                       | 5,14E-22 | Increased | 2,11  | 153 |
| Cell Death | cell death                                      | 1,43E-19 |           | 0,83  | 512 |
| Cell Death | apoptosis of leukocytes                         | 4,10E-17 |           | 1,48  | 106 |
| Cell Death | apoptosis                                       | 5,80E-17 |           | 1,38  | 401 |
| Cell Death | apoptosis of blood cells                        | 9,20E-17 |           | 1,32  | 111 |
| Cell Death | cell death of mononuclear leukocytes            | 4,52E-13 | Increased | 2,06  | 87  |
| Cell Death | cell death of lymphocytes                       | 1,42E-12 |           | 1,68  | 84  |
| Cell Death | cell death of tumor cell lines                  | 1,76E-12 |           | 0,89  | 218 |
| Cell Death | cytotoxicity                                    | 4,16E-12 |           | -0,74 | 57  |
| Cell Death | cell death of T lymphocytes                     | 6,14E-12 |           | 0,99  | 71  |
| Cell Death | apoptosis of mononuclear leukocytes             | 8,15E-12 |           | 1,61  | 77  |
| Cell Death | apoptosis of tumor cell lines                   | 1,19E-11 |           | 1,46  | 188 |
| Cell Death | apoptosis of lymphocytes                        | 2,55E-11 |           | 1,24  | 74  |
| Cell Death | cell death of leukemia cell lines               | 4,38E-11 |           | 1,01  | 65  |
| Cell Death | apoptosis of T lymphocytes                      | 5,66E-11 |           | 0,56  | 63  |
| Cell Death | cytotoxicity of leukocytes                      | 1,20E-10 |           | -1,02 | 42  |
| Cell Death | cytotoxicity of cells                           | 2,10E-10 |           | -0,80 | 52  |
| Cell Death | cytotoxicity of lymphocytes                     | 2,18E-09 |           | -1,70 | 38  |
| Cell Death | apoptosis of myeloid cells                      | 9,54E-09 |           | 1,47  | 42  |
| Cell Death | cell death of myeloid cells                     | 1,13E-08 | Increased | 2,58  | 45  |
| Cell Death | cell survival                                   | 1,30E-08 |           | 0,34  | 183 |
| Cell Death | killing of cells                                | 1,34E-08 |           | -0,05 | 39  |
| Cell Death | apoptosis of leukemia cell lines                | 1,43E-08 |           | 1,15  | 54  |
| Cell Death | apoptosis of thymocytes                         | 3,49E-08 |           | 0,43  | 33  |
| Cell Death | cytotoxicity of natural killer cells            | 2,38E-07 |           | -1,33 | 25  |
| Cell Death | cytolysis                                       | 2,84E-07 |           | -1,06 | 44  |
| Cell Death | apoptosis of hematopoietic progenitor cells     | 4,02E-07 |           | 0,13  | 41  |
| Cell Death | removal of cells                                | 5,20E-07 |           | 1,45  | 20  |
| Cell Death | cell death of thymocytes                        | 5,23E-07 |           | 0,40  | 34  |
| Cell Death | cell death of lymphoma cell lines               | 6,87E-07 |           | 0,63  | 40  |
| Cell Death | apoptosis of hematopoietic cells                | 8,14E-07 |           | 0,23  | 42  |
| Cell Death | killing of leukocytes                           | 9,29E-07 |           | -1,62 | 18  |
| Cell Death | apoptosis of phagocytes                         | 1,00E-06 |           | 0,90  | 39  |
| Cell Death | apoptosis of lymphoid organ                     | 1,08E-06 |           | 0,40  | 34  |
| Cell Death | cell death of phagocytes                        | 1,37E-06 |           | 1,92  | 41  |
| Cell Death | clearance of cells                              | 1,80E-06 |           | 1,22  | 18  |
| Cell Death | cell death of lymphoid organ                    | 4,89E-06 |           | 0,23  | 36  |
| Cell Death | survival of blood cells                         | 6,19E-06 |           | -0,17 | 48  |
| Cell Death | apoptosis of organ                              | 7,67E-06 |           | 0,01  | 104 |
| Cell Death | killing of lymphocytes                          | 7,72E-06 |           | -1,27 | 14  |
| Cell Death | cell death of hematopoietic progenitor cells    | 9,52E-06 |           | 0,11  | 42  |
| Cell Death | survival of leukocytes                          | 1,10E-05 |           | -0,27 | 44  |
| Cell Death | cell death of granulocytes                      | 1,27E-05 |           | 1,22  | 22  |
| Cell Death | killing of T lymphocytes                        | 1,43E-05 |           | -1,61 | 10  |
| Cell Death | cell death of hematopoietic cells               | 1,56E-05 |           | 0,21  | 43  |
| Cell Death | cytolysis of blood cells                        | 1,85E-05 |           | -1,34 | 27  |
| Cell Death | apoptosis of granulocytes                       | 2,31E-05 |           | 0,37  | 21  |
| Cell Death | cytolysis of lymphocytes                        | 2,38E-05 |           |       | 22  |
| Cell Death | survival of mononuclear leukocytes              | 5,94E-05 |           | -0,57 | 33  |

|                                        |                                                      |          |           |       |     |
|----------------------------------------|------------------------------------------------------|----------|-----------|-------|-----|
| Cell Death                             | apoptosis of lymphoma cell lines                     | 9,45E-05 | Increased | 2,00  | 31  |
| Cell Death                             | survival of cervical cancer cell lines               | 1,00E-04 |           | -1,67 | 35  |
| Cell Death                             | cell death of organ                                  | 1,04E-04 |           | 1,72  | 143 |
| Cell Death                             | pyroptosis of bone marrow-derived macrophages        | 1,07E-04 |           | 1,34  | 4   |
| Cell Death                             | cytotoxicity of T lymphocytes                        | 1,36E-04 |           | -1,38 | 18  |
| Cell Death                             | survival of lymphocytes                              | 1,39E-04 |           | -0,61 | 31  |
| Cell Death                             | cytolysis of tumor cell lines                        | 1,45E-04 |           | -0,92 | 11  |
| Cell Death                             | apoptosis of macrophages                             | 1,61E-04 |           | 1,20  | 20  |
| Cell Death                             | cell death of B lymphocytes                          | 1,91E-04 |           | 0,55  | 25  |
| Cell Death                             | cell death of macrophages                            | 2,05E-04 |           | 1,96  | 22  |
| Cell Death                             | apoptosis of B lymphocytes                           | 2,61E-04 |           | 0,70  | 23  |
| Cell Death                             | survival of tumor cell lines                         | 2,70E-04 |           | -1,09 | 74  |
| Cell Death                             | activation-induced cell death                        | 2,96E-04 |           | 0,06  | 17  |
| Cell Death                             | apoptosis of breast cancer cell lines                | 3,12E-04 |           | -0,32 | 43  |
| Cell Morphology                        | morphology of leukocytes                             | 2,69E-20 |           |       | 96  |
| Cell Morphology                        | abnormal morphology of leukocytes                    | 4,50E-20 |           |       | 75  |
| Cell Morphology                        | morphology of mononuclear leukocytes                 | 2,90E-19 |           |       | 65  |
| Cell Morphology                        | morphology of lymphocytes                            | 6,52E-18 |           |       | 61  |
| Cell Morphology                        | morphology of blood cells                            | 1,30E-17 |           |       | 105 |
| Cell Morphology                        | abnormal morphology of lymphocytes                   | 2,73E-16 |           |       | 53  |
| Cell Morphology                        | morphology of T lymphocytes                          | 1,43E-14 |           |       | 41  |
| Cell Morphology                        | abnormal morphology of T lymphocytes                 | 2,92E-13 |           |       | 36  |
| Cell Morphology                        | lack of T lymphocytes                                | 3,18E-09 |           |       | 15  |
| Cell Morphology                        | morphology of cells                                  | 1,68E-08 |           |       | 234 |
| Cell Morphology                        | morphology of B lymphocytes                          | 4,36E-08 |           |       | 24  |
| Cell Morphology                        | abnormal morphology of B lymphocytes                 | 6,26E-06 |           |       | 16  |
| Cell Morphology                        | lack of B lymphocytes                                | 2,93E-05 |           |       | 13  |
| Cell Morphology                        | abnormal morphology of cytotoxic T cells             | 3,84E-05 |           |       | 12  |
| Cell Morphology                        | lack of CD4+ T-lymphocytes                           | 7,07E-05 |           |       | 6   |
| Cell Morphology                        | lack of Single positive thymocytes                   | 1,07E-04 |           |       | 4   |
| Cell Morphology                        | abnormal morphology of double-negative T lymphocytes | 1,95E-04 |           |       | 8   |
| Cell Morphology                        | morphology of hematopoietic progenitor cells         | 2,50E-04 |           |       | 29  |
| Cell Signaling                         | tyrosine phosphorylation of protein                  | 7,74E-09 |           | -0,15 | 46  |
| Cell Signaling                         | cell surface receptor linked signal transduction     | 1,84E-05 | Increased | 2,18  | 63  |
| Cell Signaling                         | mobilization of Ca2+                                 | 6,22E-05 |           | 0,85  | 59  |
| Cell-mediated Immune Responses         | T cell development                                   | 3,16E-22 |           | -1,67 | 123 |
| Cell-mediated Immune Responses         | T cell homeostasis                                   | 1,13E-21 |           | -1,72 | 124 |
| Cell-mediated Immune Responses         | differentiation of T lymphocytes                     | 1,56E-16 |           | -1,07 | 89  |
| Cell-mediated Immune Responses         | selection of T lymphocytes                           | 1,10E-12 |           | -1,16 | 24  |
| Cell-mediated Immune Responses         | selection of thymocytes                              | 2,36E-12 |           | -1,00 | 22  |
| Cell-mediated Immune Responses         | positive selection of T lymphocytes                  | 3,03E-08 |           | -0,89 | 12  |
| Cell-mediated Immune Responses         | positive selection of thymocytes                     | 8,15E-08 |           | -0,96 | 11  |
| Cell-mediated Immune Responses         | T cell migration                                     | 2,46E-07 |           | -0,74 | 46  |
| Cell-mediated Immune Responses         | development of thymocytes                            | 2,71E-07 |           | -1,23 | 23  |
| Cell-mediated Immune Responses         | differentiation of helper T lymphocytes              | 1,18E-06 |           | -0,13 | 36  |
| Cell-mediated Immune Responses         | cell movement of T lymphocytes                       | 2,88E-06 |           | -0,16 | 39  |
| Cell-mediated Immune Responses         | negative selection of T lymphocytes                  | 3,25E-06 | Decreased | -2,06 | 9   |
| Cell-mediated Immune Responses         | adhesion of T lymphocytes                            | 1,27E-05 |           | 0,68  | 22  |
| Cell-mediated Immune Responses         | development of helper T lymphocytes                  | 2,10E-05 |           | -0,99 | 16  |
| Cell-mediated Immune Responses         | negative selection of thymocytes                     | 2,55E-05 |           | -1,79 | 7   |
| Cell-mediated Immune Responses         | differentiation of Th2 cells                         | 3,98E-05 |           | -0,22 | 19  |
| Cell-mediated Immune Responses         | arrest in differentiation of T lymphocytes           | 1,03E-04 |           |       | 11  |
| Cell-To-Cell Signaling and Interaction | activation of cells                                  | 1,21E-25 |           | -0,33 | 200 |
| Cell-To-Cell Signaling and Interaction | activation of blood cells                            | 1,74E-25 |           | -1,22 | 168 |
| Cell-To-Cell Signaling and Interaction | activation of leukocytes                             | 2,94E-25 |           | -1,92 | 154 |
| Cell-To-Cell Signaling and Interaction | activation of mononuclear leukocytes                 | 4,29E-18 | Decreased | -2,82 | 110 |
| Cell-To-Cell Signaling and Interaction | activation of lymphocytes                            | 5,42E-17 | Decreased | -2,56 | 104 |
| Cell-To-Cell Signaling and Interaction | activation of T lymphocytes                          | 8,77E-17 | Decreased | -2,37 | 87  |
| Cell-To-Cell Signaling and Interaction | selection of T lymphocytes                           | 1,10E-12 |           | -1,16 | 24  |
| Cell-To-Cell Signaling and Interaction | selection of thymocytes                              | 2,36E-12 |           | -1,00 | 22  |
| Cell-To-Cell Signaling and Interaction | response of leukocytes                               | 2,20E-11 |           | 1,11  | 76  |
| Cell-To-Cell Signaling and Interaction | selection of cells                                   | 5,03E-11 |           | -0,89 | 25  |
| Cell-To-Cell Signaling and Interaction | response of blood cells                              | 7,59E-11 |           | 1,25  | 77  |
| Cell-To-Cell Signaling and Interaction | binding of lymphocytes                               | 2,20E-10 |           | -1,19 | 31  |
| Cell-To-Cell Signaling and Interaction | binding of mononuclear leukocytes                    | 2,89E-10 |           | -0,76 | 35  |
| Cell-To-Cell Signaling and Interaction | binding of blood cells                               | 2,90E-10 |           | -0,46 | 56  |
| Cell-To-Cell Signaling and Interaction | binding of leukocytes                                | 1,72E-09 |           | -0,67 | 47  |

|                                                                                   |                                           |           |           |       |     |
|-----------------------------------------------------------------------------------|-------------------------------------------|-----------|-----------|-------|-----|
| Cell-To-Cell Signaling and Intera positive selection of cells                     | 4,08E-09                                  |           | -0,66     | 14    |     |
| Cell-To-Cell Signaling and Intera binding of cells                                | 7,29E-09                                  |           | 0,78      | 95    |     |
| Cell-To-Cell Signaling and Intera positive selection of lymphocytes               | 1,12E-08                                  |           | -0,39     | 13    |     |
| Cell-To-Cell Signaling and Intera response of mononuclear leukocytes              | 2,54E-08                                  |           | 0,12      | 47    |     |
| Cell-To-Cell Signaling and Intera positive selection of T lymphocytes             | 3,03E-08                                  |           | -0,89     | 12    |     |
| Cell-To-Cell Signaling and Intera activation of phagocytes                        | 3,55E-08                                  |           | 0,31      | 60    |     |
| Cell-To-Cell Signaling and Intera activation of myeloid cells                     | 4,09E-08                                  |           | 0,46      | 52    |     |
| Cell-To-Cell Signaling and Intera recruitment of granulocytes                     | 4,96E-08                                  |           | 0,87      | 43    |     |
| Cell-To-Cell Signaling and Intera adhesion of blood cells                         | 5,16E-08                                  |           | 0,07      | 73    |     |
| Cell-To-Cell Signaling and Intera positive selection of thymocytes                | 8,15E-08                                  |           | -0,96     | 11    |     |
| Cell-To-Cell Signaling and Intera recruitment of neutrophils                      | 2,44E-07                                  |           | 1,54      | 36    |     |
| Cell-To-Cell Signaling and Intera binding of T lymphocytes                        | 2,79E-07                                  |           | -1,58     | 22    |     |
| Cell-To-Cell Signaling and Intera recruitment of cells                            | 4,29E-07                                  |           | -0,19     | 60    |     |
| Cell-To-Cell Signaling and Intera recruitment of blood cells                      | 5,34E-07                                  |           | -0,13     | 56    |     |
| Cell-To-Cell Signaling and Intera recruitment of leukocytes                       | 5,96E-07                                  |           | -0,03     | 55    |     |
| Cell-To-Cell Signaling and Intera T cell response                                 | 8,57E-07                                  |           | -0,23     | 28    |     |
| Cell-To-Cell Signaling and Intera interaction of T lymphocytes                    | 1,07E-06                                  | Decreased | -2,00     | 25    |     |
| Cell-To-Cell Signaling and Intera interaction of leukocytes                       | 1,17E-06                                  |           | -1,77     | 26    |     |
| Cell-To-Cell Signaling and Intera recruitment of phagocytes                       | 1,26E-06                                  |           | 1,24      | 42    |     |
| Cell-To-Cell Signaling and Intera adhesion of immune cells                        | 2,10E-06                                  |           | 0,14      | 63    |     |
| Cell-To-Cell Signaling and Intera activation of antigen presenting cells          | 2,51E-06                                  |           | -0,63     | 45    |     |
| Cell-To-Cell Signaling and Intera stimulation of blood cells                      | 2,65E-06                                  |           | -0,67     | 36    |     |
| Cell-To-Cell Signaling and Intera response of lymphocytes                         | 2,75E-06                                  |           | -0,24     | 32    |     |
| Cell-To-Cell Signaling and Intera negative selection of T lymphocytes             | 3,25E-06                                  | Decreased | -2,06     | 9     |     |
| Cell-To-Cell Signaling and Intera stimulation of leukocytes                       | 3,30E-06                                  |           | -0,83     | 35    |     |
| Cell-To-Cell Signaling and Intera stimulation of T lymphocytes                    | 3,87E-06                                  |           | -1,30     | 24    |     |
| Cell-To-Cell Signaling and Intera stimulation of cells                            | 4,85E-06                                  |           | -0,95     | 52    |     |
| Cell-To-Cell Signaling and Intera adhesion of T lymphocytes                       | 1,27E-05                                  |           | 0,68      | 22    |     |
| Cell-To-Cell Signaling and Intera stimulation of lymphocytes                      | 1,60E-05                                  |           | -1,20     | 26    |     |
| Cell-To-Cell Signaling and Intera binding of tumor cell lines                     | 1,93E-05                                  |           | 1,04      | 35    |     |
| Cell-To-Cell Signaling and Intera negative selection of thymocytes                | 2,55E-05                                  |           | -1,79     | 7     |     |
| Cell-To-Cell Signaling and Intera response of tumor cell lines                    | 3,49E-05                                  |           | 1,04      | 21    |     |
| Cell-To-Cell Signaling and Intera phagocytosis of cells                           | 3,74E-05                                  | Increased | 2,34      | 35    |     |
| Cell-To-Cell Signaling and Intera interaction of cells                            | 4,22E-05                                  |           | -1,75     | 27    |     |
| Cell-To-Cell Signaling and Intera response of antigen presenting cells            | 5,04E-05                                  |           | 1,14      | 32    |     |
| Cell-To-Cell Signaling and Intera adhesion of lymphocytes                         | 8,15E-05                                  |           | 0,56      | 24    |     |
| Cell-To-Cell Signaling and Intera adhesion of mononuclear leukocytes              | 1,10E-04                                  |           | 0,32      | 28    |     |
| Cell-To-Cell Signaling and Intera binding of B lymphocytes                        | 1,19E-04                                  |           | -0,65     | 8     |     |
| Cell-To-Cell Signaling and Intera immune response of tumor cell lines             | 1,36E-04                                  |           | 1,20      | 19    |     |
| Cell-To-Cell Signaling and Intera response of phagocytes                          | 2,00E-04                                  |           | 1,64      | 34    |     |
| Cell-To-Cell Signaling and Intera activation of macrophages                       | 2,50E-04                                  |           | 0,00      | 29    |     |
| Cell-To-Cell Signaling and Intera binding of granulocytes                         | 2,84E-04                                  |           | -0,28     | 15    |     |
| Cellular Assembly and Organizational rearrangement of microtubule organizing cent | 1,07E-04                                  |           | -1,78     | 4     |     |
| Cellular Compromise                                                               | degranulation of cells                    | 1,37E-06  | 0,46      | 39    |     |
| Cellular Compromise                                                               | degranulation of phagocytes               | 1,65E-04  | 0,79      | 25    |     |
| Cellular Development                                                              | development of mononuclear leukocytes     | 3,39E-24  | -1,85     | 137   |     |
| Cellular Development                                                              | developmental process of lymphocytes      | 3,58E-24  | Decreased | -2,38 | 157 |
| Cellular Development                                                              | development of leukocytes                 | 3,97E-24  | -1,82     | 142   |     |
| Cellular Development                                                              | developmental process of T lymphocytes    | 5,56E-24  | Decreased | -2,46 | 133 |
| Cellular Development                                                              | development of lymphocytes                | 1,33E-23  | -1,82     | 135   |     |
| Cellular Development                                                              | development of blood cells                | 6,16E-23  | -1,97     | 152   |     |
| Cellular Development                                                              | T cell development                        | 3,16E-22  | -1,67     | 123   |     |
| Cellular Development                                                              | differentiation of mononuclear leukocytes | 5,84E-22  | -1,93     | 131   |     |
| Cellular Development                                                              | differentiation of blood cells            | 6,55E-22  | -1,78     | 164   |     |
| Cellular Development                                                              | differentiation of lymphocytes            | 9,70E-22  | -1,87     | 123   |     |
| Cellular Development                                                              | differentiation of leukocytes             | 1,50E-21  | -1,69     | 148   |     |
| Cellular Development                                                              | differentiation of T lymphocytes          | 1,56E-16  | -1,07     | 89    |     |
| Cellular Development                                                              | selection of T lymphocytes                | 1,10E-12  | -1,16     | 24    |     |
| Cellular Development                                                              | selection of thymocytes                   | 2,36E-12  | -1,00     | 22    |     |
| Cellular Development                                                              | developmental process of thymocytes       | 4,02E-11  | -1,91     | 45    |     |
| Cellular Development                                                              | differentiation of cells                  | 2,21E-10  | -1,60     | 281   |     |
| Cellular Development                                                              | differentiation                           | 2,36E-09  | -1,54     | 292   |     |
| Cellular Development                                                              | growth of blood cells                     | 1,55E-08  | -0,56     | 55    |     |
| Cellular Development                                                              | growth of immune cells                    | 1,95E-08  | -1,46     | 49    |     |
| Cellular Development                                                              | positive selection of T lymphocytes       | 3,03E-08  | -0,89     | 12    |     |
| Cellular Development                                                              | positive selection of thymocytes          | 8,15E-08  | -0,96     | 11    |     |
| Cellular Development                                                              | development of thymocytes                 | 2,71E-07  | -1,23     | 23    |     |

|                               |                                                  |          |           |       |     |
|-------------------------------|--------------------------------------------------|----------|-----------|-------|-----|
| Cellular Development          | expansion of blood cells                         | 3,43E-07 |           | -1,34 | 41  |
| Cellular Development          | expansion of leukocytes                          | 6,85E-07 | Decreased | -2,22 | 37  |
| Cellular Development          | differentiation of helper T lymphocytes          | 1,18E-06 |           | -0,13 | 36  |
| Cellular Development          | developmental process of helper T lymphocyt      | 1,59E-06 |           | -0,24 | 39  |
| Cellular Development          | growth of prostate cancer cell lines             | 2,37E-06 |           | -1,10 | 31  |
| Cellular Development          | development of hematopoietic cells               | 2,48E-06 |           | -1,92 | 37  |
| Cellular Development          | developmental process of B lymphocytes           | 2,64E-06 |           | -0,77 | 57  |
| Cellular Development          | expansion of mononuclear leukocytes              | 2,65E-06 |           | -1,85 | 33  |
| Cellular Development          | developmental process of cytotoxic T cells       | 2,72E-06 |           | -0,07 | 13  |
| Cellular Development          | growth of lymphocytes                            | 2,89E-06 |           | -1,67 | 37  |
| Cellular Development          | growth of mononuclear leukocytes                 | 3,12E-06 |           | -1,53 | 38  |
| Cellular Development          | negative selection of T lymphocytes              | 3,25E-06 | Decreased | -2,06 | 9   |
| Cellular Development          | differentiation of hematopoietic cells           | 3,86E-06 | Decreased | -2,01 | 48  |
| Cellular Development          | expansion of lymphocytes                         | 3,87E-06 | Decreased | -2,09 | 32  |
| Cellular Development          | arrest in developmental process of lymphocyt     | 5,64E-06 |           |       | 23  |
| Cellular Development          | proliferation of hematopoietic cells             | 6,10E-06 |           | -1,12 | 40  |
| Cellular Development          | proliferation of hematopoietic progenitor cells  | 6,70E-06 |           | -1,29 | 39  |
| Cellular Development          | arrest in differentiation of lymphocytes         | 1,23E-05 |           |       | 19  |
| Cellular Development          | expansion of T lymphocytes                       | 1,56E-05 | Decreased | -2,68 | 27  |
| Cellular Development          | differentiation of hematopoietic progenitor cell | 1,56E-05 | Decreased | -2,15 | 45  |
| Cellular Development          | development of hematopoietic progenitor cell:    | 1,59E-05 |           | -1,93 | 34  |
| Cellular Development          | development of helper T lymphocytes              | 2,10E-05 |           | -0,99 | 16  |
| Cellular Development          | growth of T lymphocytes                          | 2,32E-05 | Decreased | -2,41 | 29  |
| Cellular Development          | negative selection of thymocytes                 | 2,55E-05 |           | -1,79 | 7   |
| Cellular Development          | developmental process of Th2 cells               | 2,84E-05 |           | -0,23 | 21  |
| Cellular Development          | developmental process of alpha-beta T lymph      | 3,83E-05 |           | -0,72 | 10  |
| Cellular Development          | differentiation of B lymphocytes                 | 3,95E-05 |           | -0,67 | 41  |
| Cellular Development          | differentiation of Th2 cells                     | 3,98E-05 |           | -0,22 | 19  |
| Cellular Development          | arrest in differentiation of cells               | 7,60E-05 |           |       | 21  |
| Cellular Development          | growth of tumor cell lines                       | 9,96E-05 | Decreased | -2,17 | 118 |
| Cellular Development          | arrest in differentiation of T lymphocytes       | 1,03E-04 |           |       | 11  |
| Cellular Development          | developmental process of pre-B lymphocytes       | 1,63E-04 |           | -1,50 | 17  |
| Cellular Development          | arrest in developmental process of B lymphoc     | 1,63E-04 |           |       | 14  |
| Cellular Development          | maturation of leukocytes                         | 1,69E-04 | Decreased | -2,25 | 38  |
| Cellular Development          | developmental process of pro-B lymphocytes       | 2,35E-04 |           | -1,60 | 13  |
| Cellular Development          | arrest in developmental process of T lymphoc     | 2,35E-04 |           |       | 13  |
| Cellular Development          | differentiation of pre-B lymphocytes             | 2,73E-04 |           | -1,32 | 10  |
| Cellular Function and Mainten | function of blood cells                          | 4,30E-27 |           | -1,34 | 151 |
| Cellular Function and Mainten | function of leukocytes                           | 2,03E-26 |           | -1,78 | 143 |
| Cellular Function and Mainten | homeostasis of leukocytes                        | 5,21E-25 |           | -1,67 | 136 |
| Cellular Function and Mainten | Lymphocyte homeostasis                           | 5,31E-25 |           | -1,67 | 135 |
| Cellular Function and Mainten | T cell development                               | 3,16E-22 |           | -1,67 | 123 |
| Cellular Function and Mainten | T cell homeostasis                               | 1,13E-21 |           | -1,72 | 124 |
| Cellular Function and Mainten | function of lymphocytes                          | 3,44E-19 |           | -0,51 | 90  |
| Cellular Function and Mainten | function of T lymphocytes                        | 2,46E-17 |           | -0,66 | 74  |
| Cellular Function and Mainten | differentiation of T lymphocytes                 | 1,56E-16 |           | -1,07 | 89  |
| Cellular Function and Mainten | cellular homeostasis                             | 8,21E-14 |           | -1,44 | 227 |
| Cellular Function and Mainten | selection of T lymphocytes                       | 1,10E-12 |           | -1,16 | 24  |
| Cellular Function and Mainten | selection of thymocytes                          | 2,36E-12 |           | -1,00 | 22  |
| Cellular Function and Mainten | function of phagocytes                           | 4,59E-11 | Decreased | -2,42 | 70  |
| Cellular Function and Mainten | function of CD4+ T-lymphocytes                   | 7,99E-11 |           |       | 25  |
| Cellular Function and Mainten | function of myeloid cells                        | 1,69E-09 |           | -1,79 | 55  |
| Cellular Function and Mainten | positive selection of cells                      | 4,08E-09 |           | -0,66 | 14  |
| Cellular Function and Mainten | positive selection of lymphocytes                | 1,12E-08 |           | -0,39 | 13  |
| Cellular Function and Mainten | function of helper T lymphocytes                 | 2,35E-08 |           |       | 25  |
| Cellular Function and Mainten | positive selection of T lymphocytes              | 3,03E-08 |           | -0,89 | 12  |
| Cellular Function and Mainten | positive selection of thymocytes                 | 8,15E-08 |           | -0,96 | 11  |
| Cellular Function and Mainten | function of antigen presenting cells             | 1,30E-07 | Decreased | -2,06 | 52  |
| Cellular Function and Mainten | development of thymocytes                        | 2,71E-07 |           | -1,23 | 23  |
| Cellular Function and Mainten | function of granulocytes                         | 5,11E-07 |           |       | 27  |
| Cellular Function and Mainten | differentiation of helper T lymphocytes          | 1,18E-06 |           | -0,13 | 36  |
| Cellular Function and Mainten | clearance of cells                               | 1,80E-06 |           | 1,22  | 18  |
| Cellular Function and Mainten | function of Th1 cells                            | 2,25E-06 |           |       | 16  |
| Cellular Function and Mainten | negative selection of T lymphocytes              | 3,25E-06 | Decreased | -2,06 | 9   |
| Cellular Function and Mainten | function of Th2 cells                            | 5,96E-06 |           |       | 15  |
| Cellular Function and Mainten | function of macrophages                          | 1,53E-05 |           |       | 36  |
| Cellular Function and Mainten | function of neutrophils                          | 1,86E-05 |           |       | 21  |

|                                                                                   |          |           |       |     |
|-----------------------------------------------------------------------------------|----------|-----------|-------|-----|
| Cellular Function and Maintenance development of helper T lymphocytes             | 2,10E-05 |           | -0,99 | 16  |
| Cellular Function and Maintenance negative selection of thymocytes                | 2,55E-05 |           | -1,79 | 7   |
| Cellular Function and Maintenance phagocytosis of cells                           | 3,74E-05 | Increased | 2,34  | 35  |
| Cellular Function and Maintenance differentiation of Th2 cells                    | 3,98E-05 |           | -0,22 | 19  |
| Cellular Function and Maintenance phagocytosis                                    | 4,38E-05 | Increased | 2,05  | 42  |
| Cellular Function and Maintenance arrest in differentiation of T lymphocytes      | 1,03E-04 |           |       | 11  |
| Cellular Function and Maintenance engulfment of cells                             | 1,39E-04 | Increased | 2,26  | 37  |
| Cellular Function and Maintenance function of natural killer cells                | 1,62E-04 |           |       | 6   |
| Cellular Function and Maintenance function of dendritic cells                     | 2,18E-04 |           |       | 21  |
| Cellular Growth and Proliferation proliferation of immune cells                   | 1,50E-23 | Decreased | -2,09 | 169 |
| Cellular Growth and Proliferation proliferation of blood cells                    | 2,31E-23 | Decreased | -2,20 | 176 |
| Cellular Growth and Proliferation proliferation of mononuclear leukocytes         | 2,71E-23 |           | -1,98 | 163 |
| Cellular Growth and Proliferation proliferation of lymphocytes                    | 8,24E-23 |           | -1,81 | 161 |
| Cellular Growth and Proliferation proliferation of T lymphocytes                  | 3,43E-19 |           | -1,51 | 132 |
| Cellular Growth and Proliferation proliferation of cells                          | 5,15E-15 |           | 0,78  | 410 |
| Cellular Growth and Proliferation proliferation of B lymphocytes                  | 1,55E-10 |           | -1,05 | 63  |
| Cellular Growth and Proliferation growth of blood cells                           | 1,55E-08 |           | -0,56 | 55  |
| Cellular Growth and Proliferation growth of immune cells                          | 1,95E-08 |           | -1,46 | 49  |
| Cellular Growth and Proliferation expansion of blood cells                        | 3,43E-07 |           | -1,34 | 41  |
| Cellular Growth and Proliferation growth of cells                                 | 4,16E-07 |           | -1,02 | 264 |
| Cellular Growth and Proliferation generation of T lymphocytes                     | 5,16E-07 |           | -1,83 | 25  |
| Cellular Growth and Proliferation expansion of leukocytes                         | 6,85E-07 | Decreased | -2,22 | 37  |
| Cellular Growth and Proliferation expansion of cells                              | 8,46E-07 |           | -0,57 | 48  |
| Cellular Growth and Proliferation generation of lymphocytes                       | 1,06E-06 |           | -1,74 | 28  |
| Cellular Growth and Proliferation growth of prostate cancer cell lines            | 2,37E-06 |           | -1,10 | 31  |
| Cellular Growth and Proliferation expansion of mononuclear leukocytes             | 2,65E-06 |           | -1,85 | 33  |
| Cellular Growth and Proliferation stimulation of blood cells                      | 2,65E-06 |           | -0,67 | 36  |
| Cellular Growth and Proliferation growth of lymphocytes                           | 2,89E-06 |           | -1,67 | 37  |
| Cellular Growth and Proliferation growth of mononuclear leukocytes                | 3,12E-06 |           | -1,53 | 38  |
| Cellular Growth and Proliferation stimulation of leukocytes                       | 3,30E-06 |           | -0,83 | 35  |
| Cellular Growth and Proliferation expansion of lymphocytes                        | 3,87E-06 | Decreased | -2,09 | 32  |
| Cellular Growth and Proliferation stimulation of T lymphocytes                    | 3,87E-06 |           | -1,30 | 24  |
| Cellular Growth and Proliferation stimulation of cells                            | 4,85E-06 |           | -0,95 | 52  |
| Cellular Growth and Proliferation proliferation of hematopoietic cells            | 6,10E-06 |           | -1,12 | 40  |
| Cellular Growth and Proliferation proliferation of hematopoietic progenitor cells | 6,70E-06 |           | -1,29 | 39  |
| Cellular Growth and Proliferation generation of helper T lymphocytes              | 9,73E-06 | Decreased | -2,37 | 13  |
| Cellular Growth and Proliferation generation of leukocytes                        | 1,02E-05 | Decreased | -2,09 | 29  |
| Cellular Growth and Proliferation proliferation of tumor cell lines               | 1,28E-05 | Increased | 3,29  | 131 |
| Cellular Growth and Proliferation expansion of T lymphocytes                      | 1,56E-05 | Decreased | -2,68 | 27  |
| Cellular Growth and Proliferation stimulation of lymphocytes                      | 1,60E-05 |           | -1,20 | 26  |
| Cellular Growth and Proliferation growth of T lymphocytes                         | 2,32E-05 | Decreased | -2,41 | 29  |
| Cellular Growth and Proliferation proliferation of splenocytes                    | 5,12E-05 |           | -1,00 | 20  |
| Cellular Growth and Proliferation growth of tumor cell lines                      | 9,96E-05 | Decreased | -2,17 | 118 |
| Cellular Growth and Proliferation proliferation of lymphatic system cells         | 1,10E-04 |           | -0,78 | 32  |
| Cellular Growth and Proliferation proliferation of tumor cells                    | 1,19E-04 |           | 0,88  | 40  |
| Cellular Growth and Proliferation generation of Th1 cells                         | 1,62E-04 |           | -1,93 | 6   |
| Cellular Movement cell movement of leukocytes                                     | 1,12E-13 |           | -0,49 | 141 |
| Cellular Movement cell movement of blood cells                                    | 1,61E-13 |           | -0,24 | 157 |
| Cellular Movement leukocyte migration                                             | 2,77E-13 |           | -0,23 | 156 |
| Cellular Movement cell movement of mononuclear leukocytes                         | 1,04E-11 |           | -0,75 | 93  |
| Cellular Movement migration of mononuclear leukocytes                             | 3,47E-11 |           | -0,91 | 74  |
| Cellular Movement cell movement of granulocytes                                   | 1,53E-10 |           | -0,06 | 77  |
| Cellular Movement cell movement of myeloid cells                                  | 1,79E-10 |           | -0,15 | 98  |
| Cellular Movement Lymphocyte migration                                            | 3,10E-10 |           | -1,23 | 67  |
| Cellular Movement cell movement of phagocytes                                     | 3,51E-10 |           | 0,16  | 98  |
| Cellular Movement cell movement of lymphocytes                                    | 3,84E-10 |           | -1,53 | 76  |
| Cellular Movement infiltration of cells                                           | 1,81E-09 |           | -0,72 | 75  |
| Cellular Movement infiltration of blood cells                                     | 3,57E-09 |           | -0,58 | 71  |
| Cellular Movement infiltration of leukocytes                                      | 7,55E-09 |           | -0,49 | 70  |
| Cellular Movement chemotaxis of phagocytes                                        | 2,71E-08 |           | 1,23  | 57  |
| Cellular Movement migration of cells                                              | 4,20E-08 |           | 0,52  | 244 |
| Cellular Movement homing of leukocytes                                            | 4,68E-08 |           | 0,47  | 69  |
| Cellular Movement recruitment of granulocytes                                     | 4,96E-08 |           | 0,87  | 43  |
| Cellular Movement cell movement of neutrophils                                    | 7,36E-08 |           | 0,84  | 58  |
| Cellular Movement chemotaxis of neutrophils                                       | 2,40E-07 |           | 1,76  | 37  |
| Cellular Movement recruitment of neutrophils                                      | 2,44E-07 |           | 1,54  | 36  |
| Cellular Movement T cell migration                                                | 2,46E-07 |           | -0,74 | 46  |

|                                 |                                             |          |           |     |
|---------------------------------|---------------------------------------------|----------|-----------|-----|
| Cellular Movement               | chemotaxis of granulocytes                  | 3,23E-07 | 0,69      | 42  |
| Cellular Movement               | cell movement                               | 3,61E-07 | 1,08      | 263 |
| Cellular Movement               | recruitment of cells                        | 4,29E-07 | -0,19     | 60  |
| Cellular Movement               | recruitment of blood cells                  | 5,34E-07 | -0,13     | 56  |
| Cellular Movement               | recruitment of leukocytes                   | 5,96E-07 | -0,03     | 55  |
| Cellular Movement               | chemotaxis of leukocytes                    | 6,58E-07 | 0,82      | 63  |
| Cellular Movement               | recruitment of phagocytes                   | 1,26E-06 | 1,24      | 42  |
| Cellular Movement               | infiltration of myeloid cells               | 1,68E-06 | -0,37     | 42  |
| Cellular Movement               | cell movement of T lymphocytes              | 2,88E-06 | -0,16     | 39  |
| Cellular Movement               | infiltration of granulocytes                | 3,12E-06 | -0,15     | 38  |
| Cellular Movement               | migration of myeloid cells                  | 4,35E-06 | -1,19     | 33  |
| Cellular Movement               | chemotaxis of myeloid cells                 | 4,37E-06 | 0,97      | 50  |
| Cellular Movement               | migration of phagocytes                     | 6,18E-06 | -0,70     | 49  |
| Cellular Movement               | homing of cells                             | 6,21E-06 | 1,06      | 85  |
| Cellular Movement               | migration of granulocytes                   | 9,28E-06 | -1,23     | 31  |
| Cellular Movement               | chemotaxis of cells                         | 1,05E-05 | 1,51      | 80  |
| Cellular Movement               | cell movement of antigen presenting cells   | 1,15E-05 | -1,67     | 52  |
| Cellular Movement               | adhesion of T lymphocytes                   | 1,27E-05 | 0,68      | 22  |
| Cellular Movement               | migration of neutrophils                    | 1,35E-05 | -0,16     | 25  |
| Cellular Movement               | homing                                      | 1,65E-05 | 1,07      | 86  |
| Cellular Movement               | homing of lymphocytes                       | 2,94E-05 | -1,80     | 30  |
| Cellular Movement               | chemotaxis                                  | 3,45E-05 | 1,52      | 81  |
| Cellular Movement               | cell movement of eosinophils                | 7,21E-05 | -1,26     | 23  |
| Cellular Movement               | homing of mononuclear leukocytes            | 8,90E-05 | -0,65     | 37  |
| Cellular Movement               | influx of leukocytes                        | 2,28E-04 | 0,18      | 15  |
| Cellular Movement               | transmigration of granulocytes              | 2,35E-04 | -1,09     | 13  |
| Cellular Movement               | transmigration of leukocytes                | 2,61E-04 | -1,36     | 23  |
| Cellular Movement               | transmigration of cells                     | 2,91E-04 | -1,65     | 25  |
| Cellular Response to Therapeuti | radiosensitivity of cancer cells            | 1,07E-04 | -1,79     | 4   |
| Connective Tissue Development   | G2 phase of fibroblasts                     | 1,08E-04 |           | 9   |
| Connective Tissue Disorders     | rheumatic disease                           | 6,77E-22 | 0,03      | 224 |
| Connective Tissue Disorders     | arthritis                                   | 7,79E-18 | 0,25      | 199 |
| Connective Tissue Disorders     | rheumatoid arthritis                        | 6,20E-14 | -1,89     | 150 |
| Connective Tissue Disorders     | systemic lupus erythematosus                | 4,33E-09 |           | 38  |
| Connective Tissue Disorders     | juvenile rheumatoid arthritis               | 2,93E-06 |           | 29  |
| Connective Tissue Disorders     | psoriatic arthritis                         | 4,63E-06 |           | 21  |
| Connective Tissue Disorders     | polyarticular juvenile rheumatoid arthritis | 1,08E-05 |           | 23  |
| Connective Tissue Disorders     | collagen-induced arthritis                  | 8,90E-05 | -0,87     | 22  |
| Connective Tissue Disorders     | experimentally-induced arthritis            | 1,45E-04 | -0,41     | 28  |
| Connective Tissue Disorders     | damage of connective tissue                 | 2,24E-04 | 0,27      | 23  |
| Dermatological Diseases and Cc  | dermatitis                                  | 4,45E-08 | -0,25     | 76  |
| Dermatological Diseases and Cc  | atopic dermatitis                           | 8,63E-08 |           | 59  |
| Dermatological Diseases and Cc  | tuberculoid leprosy                         | 1,93E-07 |           | 13  |
| Dermatological Diseases and Cc  | leprosy                                     | 2,38E-07 |           | 25  |
| Dermatological Diseases and Cc  | psoriasis                                   | 4,41E-06 |           | 100 |
| Dermatological Diseases and Cc  | psoriatic arthritis                         | 4,63E-06 |           | 21  |
| Dermatological Diseases and Cc  | acne                                        | 1,06E-04 |           | 22  |
| Developmental Disorder          | hypoplasia of lymphoid organ                | 3,64E-08 |           | 39  |
| Developmental Disorder          | hypoplasia of spleen                        | 1,74E-05 |           | 20  |
| Developmental Disorder          | hypoplasia of thymus gland                  | 2,40E-05 |           | 24  |
| Developmental Disorder          | hypoplasia of organ                         | 1,35E-04 | -1,00     | 50  |
| Drug Metabolism                 | quantity of glutathione                     | 2,39E-04 | -0,16     | 16  |
| Embryonic Development           | development of lymphoid organ               | 2,71E-07 | Decreased | 50  |
| Embryonic Development           | development of thymocytes                   | 2,71E-07 | -1,23     | 23  |
| Embryonic Development           | development of thymus gland                 | 5,77E-05 | -1,22     | 27  |
| Embryonic Development           | morphology of germinal center               | 1,32E-04 |           | 17  |
| Embryonic Development           | abnormal morphology of germinal center      | 1,63E-04 |           | 14  |
| Endocrine System Disorders      | thyroid carcinoma                           | 2,92E-05 |           | 23  |
| Endocrine System Disorders      | differentiated thyroid cancer               | 9,26E-05 |           | 20  |
| Endocrine System Disorders      | thyroid cancer                              | 1,22E-04 |           | 31  |
| Endocrine System Disorders      | papillary thyroid cancer                    | 2,44E-04 |           | 17  |
| Gastrointestinal Disease        | colitis                                     | 1,13E-08 | -0,90     | 45  |
| Gastrointestinal Disease        | colorectal cancer                           | 3,23E-08 | -0,59     | 141 |
| Gastrointestinal Disease        | colorectal tumor                            | 3,24E-08 | -0,59     | 142 |
| Gastrointestinal Disease        | gastrointestinal tract cancer               | 4,66E-08 | -0,54     | 159 |
| Gastrointestinal Disease        | digestive organ tumor                       | 9,77E-08 | 0,27      | 218 |
| Gastrointestinal Disease        | ulcerative colitis                          | 9,66E-07 |           | 20  |



|                          |                                                    |          |           |       |     |
|--------------------------|----------------------------------------------------|----------|-----------|-------|-----|
| Gastrointestinal Disease | inflammatory bowel disease                         | 3,40E-06 |           | -0,70 | 60  |
| Gastrointestinal Disease | liver cancer                                       | 2,72E-04 |           | 0,49  | 69  |
| Gene Expression          | binding of protein binding site                    | 2,41E-05 |           | 0,50  | 54  |
| Gene Expression          | binding of DNA                                     | 1,28E-04 |           | 0,93  | 86  |
| Genetic Disorder         | immediate hypersensitivity                         | 8,71E-09 |           | 0,91  | 71  |
| Genetic Disorder         | colitis                                            | 1,13E-08 |           | -0,90 | 45  |
| Genetic Disorder         | atopic dermatitis                                  | 8,63E-08 |           |       | 59  |
| Genetic Disorder         | tuberculoid leprosy                                | 1,93E-07 |           |       | 13  |
| Genetic Disorder         | leprosy                                            | 2,38E-07 |           |       | 25  |
| Genetic Disorder         | ulcerative colitis                                 | 9,66E-07 |           |       | 20  |
| Genetic Disorder         | lung adenocarcinoma                                | 1,62E-06 |           | -0,14 | 32  |
| Genetic Disorder         | ischemic stroke                                    | 1,95E-06 |           |       | 15  |
| Genetic Disorder         | inflammatory bowel disease                         | 3,40E-06 |           | -0,70 | 60  |
| Genetic Disorder         | prostate cancer                                    | 3,81E-06 |           | -0,19 | 84  |
| Genetic Disorder         | psoriasis                                          | 4,41E-06 |           |       | 100 |
| Genetic Disorder         | psoriatic arthritis                                | 4,63E-06 |           |       | 21  |
| Hematological Disease    | hematological neoplasia                            | 1,14E-10 |           | -0,11 | 142 |
| Hematological Disease    | eosinophilia                                       | 4,57E-08 | Decreased | -2,40 | 31  |
| Hematological Disease    | lymphomagenesis                                    | 5,44E-08 |           | -0,28 | 77  |
| Hematological Disease    | non-Hodgkin's disease                              | 8,83E-08 |           | 0,15  | 60  |
| Hematological Disease    | B-cell non-Hodgkin's disease                       | 4,68E-07 |           | 0,28  | 38  |
| Hematological Disease    | lymphocytic leukemia                               | 1,09E-06 |           |       | 42  |
| Hematological Disease    | ischemic stroke                                    | 1,95E-06 |           |       | 15  |
| Hematological Disease    | brain ischemia                                     | 3,21E-06 |           |       | 16  |
| Hematological Disease    | B-cell leukemia                                    | 4,24E-06 |           |       | 29  |
| Hematological Disease    | leukemia                                           | 7,03E-06 |           | 0,06  | 62  |
| Hematological Disease    | tumorigenesis of B-cell non-Hodgkin lymphon        | 1,17E-05 |           | 0,32  | 16  |
| Hematological Disease    | diffuse large B-cell lymphoma                      | 1,18E-05 |           |       | 12  |
| Hematological Disease    | hematologic cancer                                 | 1,78E-05 |           | 0,27  | 87  |
| Hematological Disease    | tumorigenesis of non-Hodgkin lymphoma              | 4,20E-05 |           | -0,23 | 17  |
| Hematological Disease    | tumorigenesis of lymphoma                          | 7,45E-05 |           | -0,40 | 22  |
| Hematological Disease    | chronic B-cell leukemia                            | 8,90E-05 |           |       | 22  |
| Hematological Disease    | chronic leukemia                                   | 2,21E-04 |           |       | 29  |
| Hematological Disease    | diffuse B-cell lymphoma                            | 3,03E-04 |           |       | 13  |
| Hematological System     | Developn quantity of leukocytes                    | 8,73E-29 | Decreased | -4,69 | 208 |
| Hematological System     | Developn quantity of blood cells                   | 1,04E-27 | Decreased | -4,76 | 225 |
| Hematological System     | Developn quantity of mononuclear leukocytes        | 6,47E-26 | Decreased | -5,18 | 172 |
| Hematological System     | Developn activation of blood cells                 | 1,74E-25 |           | -1,22 | 168 |
| Hematological System     | Developn activation of leukocytes                  | 2,94E-25 |           | -1,92 | 154 |
| Hematological System     | Developn hematopoiesis                             | 7,43E-25 |           | -1,61 | 200 |
| Hematological System     | Developn quantity of lymphocytes                   | 2,35E-24 | Decreased | -4,80 | 164 |
| Hematological System     | Developn development of mononuclear leukocytes     | 3,39E-24 |           | -1,85 | 137 |
| Hematological System     | Developn development of leukocytes                 | 3,97E-24 |           | -1,82 | 142 |
| Hematological System     | Developn development of lymphocytes                | 1,33E-23 |           | -1,82 | 135 |
| Hematological System     | Developn proliferation of immune cells             | 1,50E-23 | Decreased | -2,09 | 169 |
| Hematological System     | Developn proliferation of mononuclear leukocytes   | 2,71E-23 |           | -1,98 | 163 |
| Hematological System     | Developn development of blood cells                | 6,16E-23 |           | -1,97 | 152 |
| Hematological System     | Developn proliferation of lymphocytes              | 8,24E-23 |           | -1,81 | 161 |
| Hematological System     | Developn T cell development                        | 3,16E-22 |           | -1,67 | 123 |
| Hematological System     | Developn differentiation of mononuclear leukocytes | 5,84E-22 |           | -1,93 | 131 |
| Hematological System     | Developn differentiation of blood cells            | 6,55E-22 |           | -1,78 | 164 |
| Hematological System     | Developn differentiation of lymphocytes            | 9,70E-22 |           | -1,87 | 123 |
| Hematological System     | Developn T cell homeostasis                        | 1,13E-21 |           | -1,72 | 124 |
| Hematological System     | Developn differentiation of leukocytes             | 1,50E-21 |           | -1,69 | 148 |
| Hematological System     | Developn quantity of T lymphocytes                 | 2,45E-21 | Decreased | -4,33 | 127 |
| Hematological System     | Developn proliferation of T lymphocytes            | 3,43E-19 |           | -1,51 | 132 |
| Hematological System     | Developn function of lymphocytes                   | 3,44E-19 |           | -0,51 | 90  |
| Hematological System     | Developn activation of mononuclear leukocytes      | 4,29E-18 | Decreased | -2,82 | 110 |
| Hematological System     | Developn function of T lymphocytes                 | 2,46E-17 |           | -0,66 | 74  |
| Hematological System     | Developn activation of lymphocytes                 | 5,42E-17 | Decreased | -2,56 | 104 |
| Hematological System     | Developn activation of T lymphocytes               | 8,77E-17 | Decreased | -2,37 | 87  |
| Hematological System     | Developn differentiation of T lymphocytes          | 1,56E-16 |           | -1,07 | 89  |
| Hematological System     | Developn quantity of helper T lymphocytes          | 3,75E-16 | Decreased | -2,95 | 54  |
| Hematological System     | Developn morphology of T lymphocytes               | 1,43E-14 |           |       | 41  |
| Hematological System     | Developn quantity of cytotoxic T cells             | 9,67E-14 |           | -0,56 | 43  |
| Hematological System     | Developn cell movement of leukocytes               | 1,12E-13 |           | -0,49 | 141 |
| Hematological System     | Developn abnormal morphology of T lymphocytes      | 2,92E-13 |           |       | 36  |

|                      |                                                     |          |           |       |    |
|----------------------|-----------------------------------------------------|----------|-----------|-------|----|
| Hematological System | Developn quantity of hematopoietic cells            | 7,26E-13 | Decreased | -2,94 | 98 |
| Hematological System | Developn quantity of hematopoietic progenitor cells | 1,06E-12 | Decreased | -2,88 | 97 |
| Hematological System | Developn selection of T lymphocytes                 | 1,10E-12 |           | -1,16 | 24 |
| Hematological System | Developn selection of thymocytes                    | 2,36E-12 |           | -1,00 | 22 |
| Hematological System | Developn cell movement of mononuclear leukocytes    | 1,04E-11 |           | -0,75 | 93 |
| Hematological System | Developn quantity of thymocytes                     | 3,07E-11 | Decreased | -2,10 | 59 |
| Hematological System | Developn migration of mononuclear leukocytes        | 3,47E-11 |           | -0,91 | 74 |
| Hematological System | Developn quantity of B lymphocytes                  | 6,32E-11 | Decreased | -2,93 | 74 |
| Hematological System | Developn function of CD4+ T-lymphocytes             | 7,99E-11 |           |       | 25 |
| Hematological System | Developn cell movement of granulocytes              | 1,53E-10 |           | -0,06 | 77 |
| Hematological System | Developn proliferation of B lymphocytes             | 1,55E-10 |           | -1,05 | 63 |
| Hematological System | Developn cell movement of myeloid cells             | 1,79E-10 |           | -0,15 | 98 |
| Hematological System | Developn binding of lymphocytes                     | 2,20E-10 |           | -1,19 | 31 |
| Hematological System | Developn binding of mononuclear leukocytes          | 2,89E-10 |           | -0,76 | 35 |
| Hematological System | Developn Lymphocyte migration                       | 3,10E-10 |           | -1,23 | 67 |
| Hematological System | Developn cell movement of phagocytes                | 3,51E-10 |           | 0,16  | 98 |
| Hematological System | Developn cell movement of lymphocytes               | 3,84E-10 |           | -1,53 | 76 |
| Hematological System | Developn quantity of myeloid cells                  | 6,76E-10 |           | -1,50 | 70 |
| Hematological System | Developn function of myeloid cells                  | 1,69E-09 |           | -1,79 | 55 |
| Hematological System | Developn binding of leukocytes                      | 1,72E-09 |           | -0,67 | 47 |
| Hematological System | Developn lack of T lymphocytes                      | 3,18E-09 |           |       | 15 |
| Hematological System | Developn infiltration of leukocytes                 | 7,55E-09 |           | -0,49 | 70 |
| Hematological System | Developn quantity of granulocytes                   | 8,61E-09 |           | -1,59 | 62 |
| Hematological System | Developn function of helper T lymphocytes           | 2,35E-08 |           |       | 25 |
| Hematological System | Developn chemotaxis of phagocytes                   | 2,71E-08 |           | 1,23  | 57 |
| Hematological System | Developn positive selection of T lymphocytes        | 3,03E-08 |           | -0,89 | 12 |
| Hematological System | Developn activation of phagocytes                   | 3,55E-08 |           | 0,31  | 60 |
| Hematological System | Developn activation of myeloid cells                | 4,09E-08 |           | 0,46  | 52 |
| Hematological System | Developn homing of leukocytes                       | 4,68E-08 |           | 0,47  | 69 |
| Hematological System | Developn recruitment of granulocytes                | 4,96E-08 |           | 0,87  | 43 |
| Hematological System | Developn cell movement of neutrophils               | 7,36E-08 |           | 0,84  | 58 |
| Hematological System | Developn positive selection of thymocytes           | 8,15E-08 |           | -0,96 | 11 |
| Hematological System | Developn chemotaxis of neutrophils                  | 2,40E-07 |           | 1,76  | 37 |
| Hematological System | Developn recruitment of neutrophils                 | 2,44E-07 |           | 1,54  | 36 |
| Hematological System | Developn T cell migration                           | 2,46E-07 |           | -0,74 | 46 |
| Hematological System | Developn development of thymocytes                  | 2,71E-07 |           | -1,23 | 23 |
| Hematological System | Developn binding of T lymphocytes                   | 2,79E-07 |           | -1,58 | 22 |
| Hematological System | Developn chemotaxis of granulocytes                 | 3,23E-07 |           | 0,69  | 42 |
| Hematological System | Developn function of granulocytes                   | 5,11E-07 |           |       | 27 |
| Hematological System | Developn generation of T lymphocytes                | 5,16E-07 |           | -1,83 | 25 |
| Hematological System | Developn recruitment of leukocytes                  | 5,96E-07 |           | -0,03 | 55 |
| Hematological System | Developn quantity of phagocytes                     | 6,14E-07 | Decreased | -2,45 | 71 |
| Hematological System | Developn chemotaxis of leukocytes                   | 6,58E-07 |           | 0,82  | 63 |
| Hematological System | Developn T cell response                            | 8,57E-07 |           | -0,23 | 28 |
| Hematological System | Developn generation of lymphocytes                  | 1,06E-06 |           | -1,74 | 28 |
| Hematological System | Developn interaction of T lymphocytes               | 1,07E-06 | Decreased | -2,00 | 25 |
| Hematological System | Developn interaction of leukocytes                  | 1,17E-06 |           | -1,77 | 26 |
| Hematological System | Developn differentiation of helper T lymphocytes    | 1,18E-06 |           | -0,13 | 36 |
| Hematological System | Developn recruitment of phagocytes                  | 1,26E-06 |           | 1,24  | 42 |
| Hematological System | Developn infiltration of myeloid cells              | 1,68E-06 |           | -0,37 | 42 |
| Hematological System | Developn adhesion of immune cells                   | 2,10E-06 |           | 0,14  | 63 |
| Hematological System | Developn function of Th1 cells                      | 2,25E-06 |           |       | 16 |
| Hematological System | Developn development of hematopoietic cells         | 2,48E-06 |           | -1,92 | 37 |
| Hematological System | Developn activation of antigen presenting cells     | 2,51E-06 |           | -0,63 | 45 |
| Hematological System | Developn response of lymphocytes                    | 2,75E-06 |           | -0,24 | 32 |
| Hematological System | Developn accumulation of leukocytes                 | 2,86E-06 |           | 0,11  | 45 |
| Hematological System | Developn cell movement of T lymphocytes             | 2,88E-06 |           | -0,16 | 39 |
| Hematological System | Developn growth of lymphocytes                      | 2,89E-06 |           | -1,67 | 37 |
| Hematological System | Developn infiltration of granulocytes               | 3,12E-06 |           | -0,15 | 38 |
| Hematological System | Developn quantity of natural killer cells           | 3,22E-06 | Decreased | -2,68 | 22 |
| Hematological System | Developn negative selection of T lymphocytes        | 3,25E-06 | Decreased | -2,06 | 9  |
| Hematological System | Developn stimulation of leukocytes                  | 3,30E-06 |           | -0,83 | 35 |
| Hematological System | Developn differentiation of hematopoietic cells     | 3,86E-06 | Decreased | -2,01 | 48 |
| Hematological System | Developn expansion of lymphocytes                   | 3,87E-06 | Decreased | -2,09 | 32 |
| Hematological System | Developn stimulation of T lymphocytes               | 3,87E-06 |           | -1,30 | 24 |
| Hematological System | Developn accumulation of blood cells                | 4,26E-06 |           | 0,23  | 46 |
| Hematological System | Developn migration of myeloid cells                 | 4,35E-06 |           | -1,19 | 33 |

|                      |                                                           |          |           |       |     |
|----------------------|-----------------------------------------------------------|----------|-----------|-------|-----|
| Hematological System | Developn chemotaxis of myeloid cells                      | 4,37E-06 |           | 0,97  | 50  |
| Hematological System | Developn function of Th2 cells                            | 5,96E-06 |           |       | 15  |
| Hematological System | Developn proliferation of hematopoietic cells             | 6,10E-06 |           | -1,12 | 40  |
| Hematological System | Developn migration of phagocytes                          | 6,18E-06 |           | -0,70 | 49  |
| Hematological System | Developn proliferation of hematopoietic progenitor cells  | 6,70E-06 |           | -1,29 | 39  |
| Hematological System | Developn migration of granulocytes                        | 9,28E-06 |           | -1,23 | 31  |
| Hematological System | Developn generation of helper T lymphocytes               | 9,73E-06 | Decreased | -2,37 | 13  |
| Hematological System | Developn cell movement of antigen presenting cells        | 1,15E-05 |           | -1,67 | 52  |
| Hematological System | Developn arrest in differentiation of lymphocytes         | 1,23E-05 |           |       | 19  |
| Hematological System | Developn adhesion of T lymphocytes                        | 1,27E-05 |           | 0,68  | 22  |
| Hematological System | Developn accumulation of myeloid cells                    | 1,28E-05 |           | 0,02  | 31  |
| Hematological System | Developn migration of neutrophils                         | 1,35E-05 |           | -0,16 | 25  |
| Hematological System | Developn function of macrophages                          | 1,53E-05 |           |       | 36  |
| Hematological System | Developn expansion of T lymphocytes                       | 1,56E-05 | Decreased | -2,68 | 27  |
| Hematological System | Developn differentiation of hematopoietic progenitor cell | 1,56E-05 | Decreased | -2,15 | 45  |
| Hematological System | Developn development of hematopoietic progenitor cell:    | 1,59E-05 |           | -1,93 | 34  |
| Hematological System | Developn stimulation of lymphocytes                       | 1,60E-05 |           | -1,20 | 26  |
| Hematological System | Developn quantity of pre-T lymphocytes                    | 1,77E-05 | Increased | 2,56  | 18  |
| Hematological System | Developn function of neutrophils                          | 1,86E-05 |           |       | 21  |
| Hematological System | Developn development of helper T lymphocytes              | 2,10E-05 |           | -0,99 | 16  |
| Hematological System | Developn quantity of neutrophils                          | 2,16E-05 |           | -0,82 | 39  |
| Hematological System | Developn growth of T lymphocytes                          | 2,32E-05 | Decreased | -2,41 | 29  |
| Hematological System | Developn negative selection of thymocytes                 | 2,55E-05 |           | -1,79 | 7   |
| Hematological System | Developn homing of lymphocytes                            | 2,94E-05 |           | -1,80 | 30  |
| Hematological System | Developn abnormal morphology of cytotoxic T cells         | 3,84E-05 |           |       | 12  |
| Hematological System | Developn differentiation of B lymphocytes                 | 3,95E-05 |           | -0,67 | 41  |
| Hematological System | Developn differentiation of Th2 cells                     | 3,98E-05 |           | -0,22 | 19  |
| Hematological System | Developn quantity of double-negative T lymphocyte         | 4,20E-05 | Increased | 2,52  | 17  |
| Hematological System | Developn myelopoiesis                                     | 4,45E-05 |           | -0,36 | 55  |
| Hematological System | Developn quantity of eosinophils                          | 6,06E-05 |           | -1,32 | 23  |
| Hematological System | Developn lack of CD4+ T-lymphocytes                       | 7,07E-05 |           |       | 6   |
| Hematological System | Developn cell movement of eosinophils                     | 7,21E-05 |           | -1,26 | 23  |
| Hematological System | Developn adhesion of lymphocytes                          | 8,15E-05 |           | 0,56  | 24  |
| Hematological System | Developn quantity of memory T lymphocytes                 | 8,76E-05 |           | -1,11 | 15  |
| Hematological System | Developn homing of mononuclear leukocytes                 | 8,90E-05 |           | -0,65 | 37  |
| Hematological System | Developn arrest in differentiation of T lymphocytes       | 1,03E-04 |           |       | 11  |
| Hematological System | Developn accumulation of phagocytes                       | 1,05E-04 |           | 0,12  | 25  |
| Hematological System | Developn lack of Single positive thymocytes               | 1,07E-04 |           |       | 4   |
| Hematological System | Developn adhesion of mononuclear leukocytes               | 1,10E-04 |           | 0,32  | 28  |
| Hematological System | Developn binding of B lymphocytes                         | 1,19E-04 |           | -0,65 | 8   |
| Hematological System | Developn survival of lymphocytes                          | 1,39E-04 |           | -0,61 | 31  |
| Hematological System | Developn generation of Th1 cells                          | 1,62E-04 |           | -1,93 | 6   |
| Hematological System | Developn function of natural killer cells                 | 1,62E-04 |           |       | 6   |
| Hematological System | Developn abnormal morphology of double-negative T ly      | 1,95E-04 |           |       | 8   |
| Hematological System | Developn accumulation of T lymphocytes                    | 1,99E-04 |           | -0,21 | 17  |
| Hematological System | Developn influx of leukocytes                             | 2,28E-04 |           | 0,18  | 15  |
| Hematological System | Developn transmigration of granulocytes                   | 2,35E-04 |           | -1,09 | 13  |
| Hematological System | Developn activation of macrophages                        | 2,50E-04 |           | 0,00  | 29  |
| Hematological System | Developn transmigration of leukocytes                     | 2,61E-04 |           | -1,36 | 23  |
| Hematological System | Developn quantity of blood platelets                      | 2,61E-04 |           | -0,04 | 23  |
| Hematological System | Developn differentiation of pre-B lymphocytes             | 2,73E-04 |           | -1,32 | 10  |
| Hematological System | Developn binding of granulocytes                          | 2,84E-04 |           | -0,28 | 15  |
| Hematological System | Developn lymphopoiesis                                    | 2,84E-04 |           | -0,06 | 15  |
| Hematopoiesis        | hematopoiesis                                             | 7,43E-25 |           | -1,61 | 200 |
| Hematopoiesis        | development of mononuclear leukocytes                     | 3,39E-24 |           | -1,85 | 137 |
| Hematopoiesis        | development of leukocytes                                 | 3,97E-24 |           | -1,82 | 142 |
| Hematopoiesis        | development of lymphocytes                                | 1,33E-23 |           | -1,82 | 135 |
| Hematopoiesis        | development of blood cells                                | 6,16E-23 |           | -1,97 | 152 |
| Hematopoiesis        | T cell development                                        | 3,16E-22 |           | -1,67 | 123 |
| Hematopoiesis        | differentiation of mononuclear leukocytes                 | 5,84E-22 |           | -1,93 | 131 |
| Hematopoiesis        | differentiation of lymphocytes                            | 9,70E-22 |           | -1,87 | 123 |
| Hematopoiesis        | differentiation of leukocytes                             | 1,50E-21 |           | -1,69 | 148 |
| Hematopoiesis        | differentiation of T lymphocytes                          | 1,56E-16 |           | -1,07 | 89  |
| Hematopoiesis        | quantity of hematopoietic cells                           | 7,26E-13 | Decreased | -2,94 | 98  |
| Hematopoiesis        | quantity of hematopoietic progenitor cells                | 1,06E-12 | Decreased | -2,88 | 97  |
| Hematopoiesis        | selection of T lymphocytes                                | 1,10E-12 |           | -1,16 | 24  |
| Hematopoiesis        | selection of thymocytes                                   | 2,36E-12 |           | -1,00 | 22  |

|                           |                                                  |          |           |       |     |
|---------------------------|--------------------------------------------------|----------|-----------|-------|-----|
| Hematopoiesis             | quantity of thymocytes                           | 3,07E-11 | Decreased | -2,10 | 59  |
| Hematopoiesis             | developmental process of thymocytes              | 4,02E-11 |           | -1,91 | 45  |
| Hematopoiesis             | positive selection of lymphocytes                | 1,12E-08 |           | -0,39 | 13  |
| Hematopoiesis             | positive selection of T lymphocytes              | 3,03E-08 |           | -0,89 | 12  |
| Hematopoiesis             | positive selection of thymocytes                 | 8,15E-08 |           | -0,96 | 11  |
| Hematopoiesis             | development of thymocytes                        | 2,71E-07 |           | -1,23 | 23  |
| Hematopoiesis             | differentiation of helper T lymphocytes          | 1,18E-06 |           | -0,13 | 36  |
| Hematopoiesis             | development of hematopoietic cells               | 2,48E-06 |           | -1,92 | 37  |
| Hematopoiesis             | negative selection of T lymphocytes              | 3,25E-06 | Decreased | -2,06 | 9   |
| Hematopoiesis             | differentiation of hematopoietic cells           | 3,86E-06 | Decreased | -2,01 | 48  |
| Hematopoiesis             | proliferation of hematopoietic cells             | 6,10E-06 |           | -1,12 | 40  |
| Hematopoiesis             | proliferation of hematopoietic progenitor cells  | 6,70E-06 |           | -1,29 | 39  |
| Hematopoiesis             | arrest in differentiation of lymphocytes         | 1,23E-05 |           |       | 19  |
| Hematopoiesis             | differentiation of hematopoietic progenitor cell | 1,56E-05 | Decreased | -2,15 | 45  |
| Hematopoiesis             | development of hematopoietic progenitor cell:    | 1,59E-05 |           | -1,93 | 34  |
| Hematopoiesis             | quantity of pre-T lymphocytes                    | 1,77E-05 | Increased | 2,56  | 18  |
| Hematopoiesis             | development of helper T lymphocytes              | 2,10E-05 |           | -0,99 | 16  |
| Hematopoiesis             | negative selection of thymocytes                 | 2,55E-05 |           | -1,79 | 7   |
| Hematopoiesis             | differentiation of B lymphocytes                 | 3,95E-05 |           | -0,67 | 41  |
| Hematopoiesis             | differentiation of Th2 cells                     | 3,98E-05 |           | -0,22 | 19  |
| Hematopoiesis             | quantity of double-negative T lymphocyte         | 4,20E-05 | Increased | 2,52  | 17  |
| Hematopoiesis             | myelopoiesis                                     | 4,45E-05 |           | -0,36 | 55  |
| Hematopoiesis             | arrest in differentiation of T lymphocytes       | 1,03E-04 |           |       | 11  |
| Hematopoiesis             | lack of Single positive thymocytes               | 1,07E-04 |           |       | 4   |
| Hematopoiesis             | developmental process of pre-B lymphocytes       | 1,63E-04 |           | -1,50 | 17  |
| Hematopoiesis             | maturation of leukocytes                         | 1,69E-04 | Decreased | -2,25 | 38  |
| Hematopoiesis             | abnormal morphology of double-negative T ly      | 1,95E-04 |           |       | 8   |
| Hematopoiesis             | developmental process of pro-B lymphocytes       | 2,35E-04 |           | -1,60 | 13  |
| Hematopoiesis             | morphology of hematopoietic progenitor cells     | 2,50E-04 |           |       | 29  |
| Hematopoiesis             | differentiation of pre-B lymphocytes             | 2,73E-04 |           | -1,32 | 10  |
| Hematopoiesis             | lymphopoiesis                                    | 2,84E-04 |           | -0,06 | 15  |
| Hepatic System Disease    | liver cancer                                     | 2,72E-04 |           | 0,49  | 69  |
| Humoral Immune Response   | quantity of immunoglobulin                       | 2,48E-14 |           | -1,75 | 74  |
| Humoral Immune Response   | production of antibody                           | 7,58E-14 |           | -1,85 | 76  |
| Humoral Immune Response   | quantity of IgG                                  | 1,28E-12 |           | -1,47 | 59  |
| Humoral Immune Response   | quantity of B lymphocytes                        | 6,32E-11 | Decreased | -2,93 | 74  |
| Humoral Immune Response   | proliferation of B lymphocytes                   | 1,55E-10 |           | -1,05 | 63  |
| Humoral Immune Response   | quantity of IgG1                                 | 8,31E-09 |           | -1,04 | 35  |
| Humoral Immune Response   | morphology of B lymphocytes                      | 4,36E-08 |           |       | 24  |
| Humoral Immune Response   | quantity of IgG2a                                | 6,43E-07 |           | -0,66 | 27  |
| Humoral Immune Response   | quantity of IgE                                  | 7,39E-07 |           | 0,49  | 24  |
| Humoral Immune Response   | quantity of IgG3                                 | 5,19E-06 |           | -0,71 | 22  |
| Humoral Immune Response   | abnormal morphology of B lymphocytes             | 6,26E-06 |           |       | 16  |
| Humoral Immune Response   | lack of B lymphocytes                            | 2,93E-05 |           |       | 13  |
| Humoral Immune Response   | differentiation of B lymphocytes                 | 3,95E-05 |           | -0,67 | 41  |
| Humoral Immune Response   | quantity of IgM                                  | 3,98E-05 | Decreased | -2,54 | 19  |
| Humoral Immune Response   | quantity of IgG2b                                | 5,81E-05 |           | -1,84 | 18  |
| Humoral Immune Response   | binding of B lymphocytes                         | 1,19E-04 |           | -0,65 | 8   |
| Humoral Immune Response   | morphology of germinal center                    | 1,32E-04 |           |       | 17  |
| Humoral Immune Response   | abnormal morphology of germinal center           | 1,63E-04 |           |       | 14  |
| Humoral Immune Response   | differentiation of pre-B lymphocytes             | 2,73E-04 |           | -1,32 | 10  |
| Hypersensitivity Response | quantity of eosinophils                          | 6,06E-05 |           | -1,32 | 23  |
| Hypersensitivity Response | cell movement of eosinophils                     | 7,21E-05 |           | -1,26 | 23  |
| Immune Cell Trafficking   | activation of leukocytes                         | 2,94E-25 |           | -1,92 | 154 |
| Immune Cell Trafficking   | activation of mononuclear leukocytes             | 4,29E-18 | Decreased | -2,82 | 110 |
| Immune Cell Trafficking   | activation of lymphocytes                        | 5,42E-17 | Decreased | -2,56 | 104 |
| Immune Cell Trafficking   | activation of T lymphocytes                      | 8,77E-17 | Decreased | -2,37 | 87  |
| Immune Cell Trafficking   | cell movement of leukocytes                      | 1,12E-13 |           | -0,49 | 141 |
| Immune Cell Trafficking   | leukocyte migration                              | 2,77E-13 |           | -0,23 | 156 |
| Immune Cell Trafficking   | cell movement of mononuclear leukocytes          | 1,04E-11 |           | -0,75 | 93  |
| Immune Cell Trafficking   | migration of mononuclear leukocytes              | 3,47E-11 |           | -0,91 | 74  |
| Immune Cell Trafficking   | cell movement of granulocytes                    | 1,53E-10 |           | -0,06 | 77  |
| Immune Cell Trafficking   | cell movement of myeloid cells                   | 1,79E-10 |           | -0,15 | 98  |
| Immune Cell Trafficking   | Lymphocyte migration                             | 3,10E-10 |           | -1,23 | 67  |
| Immune Cell Trafficking   | cell movement of phagocytes                      | 3,51E-10 |           | 0,16  | 98  |
| Immune Cell Trafficking   | cell movement of lymphocytes                     | 3,84E-10 |           | -1,53 | 76  |
| Immune Cell Trafficking   | infiltration of leukocytes                       | 7,55E-09 |           | -0,49 | 70  |

|                         |                                             |          |                 |     |
|-------------------------|---------------------------------------------|----------|-----------------|-----|
| Immune Cell Trafficking | chemotaxis of phagocytes                    | 2,71E-08 | 1,23            | 57  |
| Immune Cell Trafficking | activation of phagocytes                    | 3,55E-08 | 0,31            | 60  |
| Immune Cell Trafficking | activation of myeloid cells                 | 4,09E-08 | 0,46            | 52  |
| Immune Cell Trafficking | homing of leukocytes                        | 4,68E-08 | 0,47            | 69  |
| Immune Cell Trafficking | recruitment of granulocytes                 | 4,96E-08 | 0,87            | 43  |
| Immune Cell Trafficking | cell movement of neutrophils                | 7,36E-08 | 0,84            | 58  |
| Immune Cell Trafficking | chemotaxis of neutrophils                   | 2,40E-07 | 1,76            | 37  |
| Immune Cell Trafficking | recruitment of neutrophils                  | 2,44E-07 | 1,54            | 36  |
| Immune Cell Trafficking | T cell migration                            | 2,46E-07 | -0,74           | 46  |
| Immune Cell Trafficking | chemotaxis of granulocytes                  | 3,23E-07 | 0,69            | 42  |
| Immune Cell Trafficking | recruitment of leukocytes                   | 5,96E-07 | -0,03           | 55  |
| Immune Cell Trafficking | chemotaxis of leukocytes                    | 6,58E-07 | 0,82            | 63  |
| Immune Cell Trafficking | recruitment of phagocytes                   | 1,26E-06 | 1,24            | 42  |
| Immune Cell Trafficking | infiltration of myeloid cells               | 1,68E-06 | -0,37           | 42  |
| Immune Cell Trafficking | adhesion of immune cells                    | 2,10E-06 | 0,14            | 63  |
| Immune Cell Trafficking | activation of antigen presenting cells      | 2,51E-06 | -0,63           | 45  |
| Immune Cell Trafficking | accumulation of leukocytes                  | 2,86E-06 | 0,11            | 45  |
| Immune Cell Trafficking | cell movement of T lymphocytes              | 2,88E-06 | -0,16           | 39  |
| Immune Cell Trafficking | infiltration of granulocytes                | 3,12E-06 | -0,15           | 38  |
| Immune Cell Trafficking | migration of myeloid cells                  | 4,35E-06 | -1,19           | 33  |
| Immune Cell Trafficking | chemotaxis of myeloid cells                 | 4,37E-06 | 0,97            | 50  |
| Immune Cell Trafficking | migration of phagocytes                     | 6,18E-06 | -0,70           | 49  |
| Immune Cell Trafficking | migration of granulocytes                   | 9,28E-06 | -1,23           | 31  |
| Immune Cell Trafficking | cell movement of antigen presenting cells   | 1,15E-05 | -1,67           | 52  |
| Immune Cell Trafficking | adhesion of T lymphocytes                   | 1,27E-05 | 0,68            | 22  |
| Immune Cell Trafficking | accumulation of myeloid cells               | 1,28E-05 | 0,02            | 31  |
| Immune Cell Trafficking | migration of neutrophils                    | 1,35E-05 | -0,16           | 25  |
| Immune Cell Trafficking | homing of lymphocytes                       | 2,94E-05 | -1,80           | 30  |
| Immune Cell Trafficking | cell movement of eosinophils                | 7,21E-05 | -1,26           | 23  |
| Immune Cell Trafficking | adhesion of lymphocytes                     | 8,15E-05 | 0,56            | 24  |
| Immune Cell Trafficking | homing of mononuclear leukocytes            | 8,90E-05 | -0,65           | 37  |
| Immune Cell Trafficking | accumulation of phagocytes                  | 1,05E-04 | 0,12            | 25  |
| Immune Cell Trafficking | adhesion of mononuclear leukocytes          | 1,10E-04 | 0,32            | 28  |
| Immune Cell Trafficking | accumulation of T lymphocytes               | 1,99E-04 | -0,21           | 17  |
| Immune Cell Trafficking | influx of leukocytes                        | 2,28E-04 | 0,18            | 15  |
| Immune Cell Trafficking | transmigration of granulocytes              | 2,35E-04 | -1,09           | 13  |
| Immune Cell Trafficking | activation of macrophages                   | 2,50E-04 | 0,00            | 29  |
| Immune Cell Trafficking | transmigration of leukocytes                | 2,61E-04 | -1,36           | 23  |
| Immune Cell Trafficking | binding of granulocytes                     | 2,84E-04 | -0,28           | 15  |
| Immunological Disease   | autoimmune disease                          | 3,86E-21 | -0,90           | 242 |
| Immunological Disease   | rheumatoid arthritis                        | 6,20E-14 | -1,89           | 150 |
| Immunological Disease   | hypersensitive reaction                     | 2,65E-11 | 0,30            | 95  |
| Immunological Disease   | systemic lupus erythematosus                | 4,33E-09 |                 | 38  |
| Immunological Disease   | immediate hypersensitivity                  | 8,71E-09 | 0,91            | 71  |
| Immunological Disease   | hypoplasia of lymphoid organ                | 3,64E-08 |                 | 39  |
| Immunological Disease   | eosinophilia                                | 4,57E-08 | Decreased -2,40 | 31  |
| Immunological Disease   | atopic dermatitis                           | 8,63E-08 |                 | 59  |
| Immunological Disease   | lymphoproliferative disorder                | 1,07E-07 | -0,65           | 47  |
| Immunological Disease   | delayed hypersensitive reaction             | 2,87E-07 | -0,53           | 32  |
| Immunological Disease   | experimental autoimmune encephalomyelitis   | 5,88E-07 | -0,25           | 46  |
| Immunological Disease   | lymphocytic leukemia                        | 1,09E-06 |                 | 42  |
| Immunological Disease   | juvenile rheumatoid arthritis               | 2,93E-06 |                 | 29  |
| Immunological Disease   | B-cell leukemia                             | 4,24E-06 |                 | 29  |
| Immunological Disease   | polyarticular juvenile rheumatoid arthritis | 1,08E-05 |                 | 23  |
| Immunological Disease   | tumorigenesis of B-cell non-Hodgkin lymphon | 1,17E-05 | 0,32            | 16  |
| Immunological Disease   | hypoplasia of spleen                        | 1,74E-05 |                 | 20  |
| Immunological Disease   | hypoplasia of thymus gland                  | 2,40E-05 |                 | 24  |
| Immunological Disease   | tumorigenesis of non-Hodgkin lymphoma       | 4,20E-05 | -0,23           | 17  |
| Immunological Disease   | tumorigenesis of lymphoma                   | 7,45E-05 | -0,40           | 22  |
| Immunological Disease   | chronic B-cell leukemia                     | 8,90E-05 |                 | 22  |
| Immunological Disease   | tumorigenesis of thymus gland               | 1,07E-04 | -1,00           | 4   |
| Immunological Disease   | autoimmune glomerulonephritis               | 3,06E-04 | -1,15           | 8   |
| Immunological Disease   | membranous glomerulonephritis               | 3,25E-04 |                 | 6   |
| Infectious Disease      | severe acute respiratory syndrome           | 9,83E-28 |                 | 59  |
| Infectious Disease      | infection of respiratory tract              | 1,35E-24 |                 | 61  |
| Infectious Disease      | infection of mammalia                       | 3,17E-13 | 0,09            | 80  |
| Infectious Disease      | infection by bacteria                       | 3,52E-09 | -0,85           | 78  |

|                                 |                                             |          |           |       |     |
|---------------------------------|---------------------------------------------|----------|-----------|-------|-----|
| Infectious Disease              | infection by virus                          | 1,12E-08 |           | 1,08  | 203 |
| Infectious Disease              | parasitosis                                 | 7,49E-08 | Increased | 2,85  | 35  |
| Infectious Disease              | tuberculoïd leprosy                         | 1,93E-07 |           |       | 13  |
| Infectious Disease              | leprosy                                     | 2,38E-07 |           |       | 25  |
| Inflammatory Disease            | rheumatic disease                           | 6,77E-22 |           | 0,03  | 224 |
| Inflammatory Disease            | arthritis                                   | 7,79E-18 |           | 0,25  | 199 |
| Inflammatory Disease            | rheumatoid arthritis                        | 6,20E-14 |           | -1,89 | 150 |
| Inflammatory Disease            | systemic lupus erythematosus                | 4,33E-09 |           |       | 38  |
| Inflammatory Disease            | colitis                                     | 1,13E-08 |           | -0,90 | 45  |
| Inflammatory Disease            | dermatitis                                  | 4,45E-08 |           | -0,25 | 76  |
| Inflammatory Disease            | atopic dermatitis                           | 8,63E-08 |           |       | 59  |
| Inflammatory Disease            | encephalomyelitis                           | 2,64E-07 |           | -0,24 | 47  |
| Inflammatory Disease            | experimental autoimmune encephalomyelitis   | 5,88E-07 |           | -0,25 | 46  |
| Inflammatory Disease            | encephalitis                                | 7,40E-07 |           | -0,36 | 48  |
| Inflammatory Disease            | ulcerative colitis                          | 9,66E-07 |           |       | 20  |
| Inflammatory Disease            | juvenile rheumatoid arthritis               | 2,93E-06 |           |       | 29  |
| Inflammatory Disease            | inflammatory bowel disease                  | 3,40E-06 |           | -0,70 | 60  |
| Inflammatory Disease            | psoriatic arthritis                         | 4,63E-06 |           |       | 21  |
| Inflammatory Disease            | airway hyperresponsiveness                  | 9,04E-06 |           | 0,86  | 24  |
| Inflammatory Disease            | polyarticular juvenile rheumatoid arthritis | 1,08E-05 |           |       | 23  |
| Inflammatory Disease            | myocarditis                                 | 1,79E-05 |           | 0,64  | 12  |
| Inflammatory Disease            | collagen-induced arthritis                  | 8,90E-05 |           | -0,87 | 22  |
| Inflammatory Disease            | acne                                        | 1,06E-04 |           |       | 22  |
| Inflammatory Disease            | experimentally-induced arthritis            | 1,45E-04 |           | -0,41 | 28  |
| Inflammatory Disease            | glomerulonephritis                          | 2,46E-04 |           | -0,72 | 28  |
| Inflammatory Disease            | carditis                                    | 2,65E-04 |           | 0,20  | 14  |
| Inflammatory Disease            | autoimmune glomerulonephritis               | 3,06E-04 |           | -1,15 | 8   |
| Inflammatory Disease            | membranous glomerulonephritis               | 3,25E-04 |           |       | 6   |
| Lipid Metabolism                | synthesis of eicosanoid                     | 2,16E-05 |           | -0,06 | 39  |
| Lipid Metabolism                | metabolism of eicosanoid                    | 4,94E-05 |           | 0,10  | 41  |
| Lipid Metabolism                | synthesis of fatty acid                     | 2,19E-04 |           | -0,57 | 47  |
| Lymphoid Tissue Structure and [ | development of mononuclear leukocytes       | 3,39E-24 |           | -1,85 | 137 |
| Lymphoid Tissue Structure and [ | development of leukocytes                   | 3,97E-24 |           | -1,82 | 142 |
| Lymphoid Tissue Structure and [ | development of lymphocytes                  | 1,33E-23 |           | -1,82 | 135 |
| Lymphoid Tissue Structure and [ | T cell development                          | 3,16E-22 |           | -1,67 | 123 |
| Lymphoid Tissue Structure and [ | differentiation of T lymphocytes            | 1,56E-16 |           | -1,07 | 89  |
| Lymphoid Tissue Structure and [ | morphology of lymphatic system component    | 2,97E-13 |           |       | 94  |
| Lymphoid Tissue Structure and [ | selection of T lymphocytes                  | 1,10E-12 |           | -1,16 | 24  |
| Lymphoid Tissue Structure and [ | selection of thymocytes                     | 2,36E-12 |           | -1,00 | 22  |
| Lymphoid Tissue Structure and [ | morphology of lymphoid organ                | 3,28E-11 |           |       | 80  |
| Lymphoid Tissue Structure and [ | abnormal morphology of lymphoid organ       | 4,93E-11 |           |       | 77  |
| Lymphoid Tissue Structure and [ | morphology of thymus gland                  | 7,77E-09 |           |       | 31  |
| Lymphoid Tissue Structure and [ | abnormal morphology of spleen               | 2,79E-08 |           |       | 55  |
| Lymphoid Tissue Structure and [ | positive selection of T lymphocytes         | 3,03E-08 |           | -0,89 | 12  |
| Lymphoid Tissue Structure and [ | positive selection of thymocytes            | 8,15E-08 |           | -0,96 | 11  |
| Lymphoid Tissue Structure and [ | development of lymphoid organ               | 2,71E-07 | Decreased | -2,02 | 50  |
| Lymphoid Tissue Structure and [ | development of thymocytes                   | 2,71E-07 |           | -1,23 | 23  |
| Lymphoid Tissue Structure and [ | abnormal morphology of thymus gland         | 4,04E-07 |           |       | 27  |
| Lymphoid Tissue Structure and [ | differentiation of helper T lymphocytes     | 1,18E-06 |           | -0,13 | 36  |
| Lymphoid Tissue Structure and [ | development of lymphatic system component   | 1,36E-06 | Decreased | -2,28 | 64  |
| Lymphoid Tissue Structure and [ | negative selection of T lymphocytes         | 3,25E-06 | Decreased | -2,06 | 9   |
| Lymphoid Tissue Structure and [ | quantity of lymphatic system cells          | 8,74E-06 |           | -1,98 | 48  |
| Lymphoid Tissue Structure and [ | morphology of lymph node                    | 1,62E-05 |           |       | 32  |
| Lymphoid Tissue Structure and [ | development of helper T lymphocytes         | 2,10E-05 |           | -0,99 | 16  |
| Lymphoid Tissue Structure and [ | abnormal morphology of thymus cortex        | 2,38E-05 |           |       | 9   |
| Lymphoid Tissue Structure and [ | negative selection of thymocytes            | 2,55E-05 |           | -1,79 | 7   |
| Lymphoid Tissue Structure and [ | differentiation of Th2 cells                | 3,98E-05 |           | -0,22 | 19  |
| Lymphoid Tissue Structure and [ | proliferation of splenocytes                | 5,12E-05 |           | -1,00 | 20  |
| Lymphoid Tissue Structure and [ | abnormal morphology of lymph node           | 5,74E-05 |           |       | 29  |
| Lymphoid Tissue Structure and [ | development of thymus gland                 | 5,77E-05 |           | -1,22 | 27  |
| Lymphoid Tissue Structure and [ | arrest in differentiation of T lymphocytes  | 1,03E-04 |           |       | 11  |
| Lymphoid Tissue Structure and [ | lack of Single positive thymocytes          | 1,07E-04 |           |       | 4   |
| Lymphoid Tissue Structure and [ | abnormal morphology of thymus medulla       | 1,08E-04 |           |       | 9   |
| Lymphoid Tissue Structure and [ | proliferation of lymphatic system cells     | 1,10E-04 |           | -0,78 | 32  |
| Lymphoid Tissue Structure and [ | morphology of germinal center               | 1,32E-04 |           |       | 17  |
| Lymphoid Tissue Structure and [ | abnormal morphology of germinal center      | 1,63E-04 |           |       | 14  |
| Molecular Transport             | mobilization of Ca <sup>2+</sup>            | 6,22E-05 |           | -0,85 | 59  |

|                                 |                                           |          |           |       |     |
|---------------------------------|-------------------------------------------|----------|-----------|-------|-----|
| Molecular Transport             | quantity of glutathione                   | 2,39E-04 |           | -0,16 | 16  |
| Neurological Disease            | encephalomyelitis                         | 2,64E-07 |           | -0,24 | 47  |
| Neurological Disease            | experimental autoimmune encephalomyelitis | 5,88E-07 |           | -0,25 | 46  |
| Neurological Disease            | encephalitis                              | 7,40E-07 |           | -0,36 | 48  |
| Neurological Disease            | neuromuscular disease                     | 1,58E-06 |           | 0,70  | 158 |
| Neurological Disease            | ischemic stroke                           | 1,95E-06 |           |       | 15  |
| Neurological Disease            | brain ischemia                            | 3,21E-06 |           |       | 16  |
| Neurological Disease            | encephalopathy                            | 7,29E-06 |           | 0,19  | 192 |
| Neurological Disease            | cerebrovascular dysfunction               | 1,23E-05 |           |       | 19  |
| Organ Development               | development of lymphoid organ             | 2,71E-07 | Decreased | -2,02 | 50  |
| Organ Development               | development of thymocytes                 | 2,71E-07 |           | -1,23 | 23  |
| Organ Development               | development of thymus gland               | 5,77E-05 |           | -1,22 | 27  |
| Organ Development               | morphology of germinal center             | 1,32E-04 |           |       | 17  |
| Organ Development               | abnormal morphology of germinal center    | 1,63E-04 |           |       | 14  |
| Organ Morphology                | morphology of lymphoid organ              | 3,28E-11 |           |       | 80  |
| Organ Morphology                | abnormal morphology of lymphoid organ     | 4,93E-11 |           |       | 77  |
| Organ Morphology                | morphology of thymus gland                | 7,77E-09 |           |       | 31  |
| Organ Morphology                | abnormal morphology of spleen             | 2,79E-08 |           |       | 55  |
| Organ Morphology                | abnormal morphology of thymus gland       | 4,04E-07 |           |       | 27  |
| Organ Morphology                | morphology of lymph node                  | 1,62E-05 |           |       | 32  |
| Organ Morphology                | abnormal morphology of lymph node         | 5,74E-05 |           |       | 29  |
| Organ Morphology                | lack of Single positive thymocytes        | 1,07E-04 |           |       | 4   |
| Organ Morphology                | involution of organ                       | 1,19E-04 |           |       | 8   |
| Organismal Development          | development of lymphoid organ             | 2,71E-07 | Decreased | -2,02 | 50  |
| Organismal Development          | development of thymocytes                 | 2,71E-07 |           | -1,23 | 23  |
| Organismal Development          | development of thymus gland               | 5,77E-05 |           | -1,22 | 27  |
| Organismal Development          | morphology of germinal center             | 1,32E-04 |           |       | 17  |
| Organismal Development          | abnormal morphology of germinal center    | 1,63E-04 |           |       | 14  |
| Organismal Injury and Abnormal  | damage of connective tissue               | 2,24E-04 |           | 0,27  | 23  |
| Organismal Survival             | survival of organism                      | 4,16E-07 |           | -1,14 | 102 |
| Organismal Survival             | organismal death                          | 1,11E-04 |           | -1,49 | 219 |
| Post-Translational Modification | phosphorylation of protein                | 5,46E-09 |           | -0,51 | 122 |
| Post-Translational Modification | tyrosine phosphorylation of protein       | 7,74E-09 |           | -0,15 | 46  |
| Post-Translational Modification | phosphorylation of L-amino acid           | 1,06E-05 |           | -0,48 | 37  |
| Post-Translational Modification | phosphorylation of L-tyrosine             | 8,33E-05 |           | -0,38 | 28  |
| Protein Synthesis               | quantity of immunoglobulin                | 2,48E-14 |           | -1,75 | 74  |
| Protein Synthesis               | production of antibody                    | 7,58E-14 |           | -1,85 | 76  |
| Protein Synthesis               | quantity of IgG                           | 1,28E-12 |           | -1,47 | 59  |
| Protein Synthesis               | quantity of IgG1                          | 8,31E-09 |           | -1,04 | 35  |
| Protein Synthesis               | quantity of IgG2a                         | 6,43E-07 |           | -0,66 | 27  |
| Protein Synthesis               | quantity of IgE                           | 7,39E-07 |           | 0,49  | 24  |
| Protein Synthesis               | quantity of IgG3                          | 5,19E-06 |           | -0,71 | 22  |
| Protein Synthesis               | quantity of IgM                           | 3,98E-05 | Decreased | -2,54 | 19  |
| Protein Synthesis               | quantity of IgG2b                         | 5,81E-05 |           | -1,84 | 18  |
| Protein Synthesis               | quantity of interleukin                   | 3,20E-04 |           | -0,65 | 24  |
| Renal and Urological Disease    | renal cancer                              | 1,31E-07 |           |       | 61  |
| Renal and Urological Disease    | urological disorder                       | 8,51E-05 |           | 0,48  | 140 |
| Renal and Urological Disease    | glomerulonephritis                        | 2,46E-04 |           | -0,72 | 28  |
| Renal and Urological Disease    | autoimmune glomerulonephritis             | 3,06E-04 |           | -1,15 | 8   |
| Renal and Urological Disease    | membranous glomerulonephritis             | 3,25E-04 |           |       | 6   |
| Reproductive System Disease     | genital tumor                             | 1,94E-09 |           | 0,66  | 152 |
| Reproductive System Disease     | prostate cancer                           | 3,81E-06 |           | -0,19 | 84  |
| Reproductive System Disease     | prostatic tumor                           | 4,56E-06 |           | -0,32 | 85  |
| Reproductive System Disease     | gonadal tumor                             | 9,15E-06 |           | 1,08  | 81  |
| Reproductive System Disease     | uterine serous papillary cancer           | 1,63E-05 |           |       | 50  |
| Reproductive System Disease     | endometrial cancer                        | 3,46E-05 |           |       | 64  |
| Reproductive System Disease     | endometrial carcinoma                     | 3,56E-05 |           |       | 68  |
| Reproductive System Disease     | endometriosis                             | 8,76E-05 |           |       | 67  |
| Reproductive System Disease     | uterine cancer                            | 8,84E-05 |           |       | 107 |
| Reproductive System Disease     | breast cancer                             | 9,17E-05 |           | 0,57  | 133 |
| Respiratory Disease             | severe acute respiratory syndrome         | 9,83E-28 |           |       | 59  |
| Respiratory Disease             | infection of respiratory tract            | 1,35E-24 |           |       | 61  |
| Respiratory Disease             | lung adenocarcinoma                       | 1,62E-06 |           | -0,14 | 32  |
| Respiratory Disease             | airway hyperresponsiveness                | 9,04E-06 |           | 0,86  | 24  |
| Respiratory Disease             | pneumonitis                               | 4,19E-05 |           | -0,02 | 31  |
| Skeletal and Muscular Disorders | rheumatic disease                         | 6,77E-22 |           | 0,03  | 224 |
| Skeletal and Muscular Disorders | arthritis                                 | 7,79E-18 |           | 0,25  | 199 |

|                                 |                                             |          |           |       |     |
|---------------------------------|---------------------------------------------|----------|-----------|-------|-----|
| Skeletal and Muscular Disorders | rheumatoid arthritis                        | 6,20E-14 |           | -1,89 | 150 |
| Skeletal and Muscular Disorders | systemic lupus erythematosus                | 4,33E-09 |           |       | 38  |
| Skeletal and Muscular Disorders | neuromuscular disease                       | 1,58E-06 |           | 0,70  | 158 |
| Skeletal and Muscular Disorders | ischemic stroke                             | 1,95E-06 |           |       | 15  |
| Skeletal and Muscular Disorders | juvenile rheumatoid arthritis               | 2,93E-06 |           |       | 29  |
| Skeletal and Muscular Disorders | psoriatic arthritis                         | 4,63E-06 |           |       | 21  |
| Skeletal and Muscular Disorders | polyarticular juvenile rheumatoid arthritis | 1,08E-05 |           |       | 23  |
| Skeletal and Muscular Disorders | collagen-induced arthritis                  | 8,90E-05 |           | -0,87 | 22  |
| Skeletal and Muscular Disorders | experimentally-induced arthritis            | 1,45E-04 |           | -0,41 | 28  |
| Skeletal and Muscular System    | D mitosis of cardiomyocytes                 | 1,09E-05 |           | 0,36  | 5   |
| Small Molecule Biochemistry     | phosphorylation of L-amino acid             | 1,06E-05 |           | -0,48 | 37  |
| Small Molecule Biochemistry     | synthesis of eicosanoid                     | 2,16E-05 |           | -0,06 | 39  |
| Small Molecule Biochemistry     | metabolism of eicosanoid                    | 4,94E-05 |           | 0,10  | 41  |
| Small Molecule Biochemistry     | phosphorylation of L-tyrosine               | 8,33E-05 |           | -0,38 | 28  |
| Small Molecule Biochemistry     | synthesis of fatty acid                     | 2,19E-04 |           | -0,57 | 47  |
| Small Molecule Biochemistry     | quantity of glutathione                     | 2,39E-04 |           | -0,16 | 16  |
| Tissue Development              | adhesion of blood cells                     | 5,16E-08 |           | 0,07  | 73  |
| Tissue Development              | accumulation of cells                       | 2,68E-07 |           | 0,30  | 60  |
| Tissue Development              | development of lymphoid organ               | 2,71E-07 | Decreased | -2,02 | 50  |
| Tissue Development              | development of thymocytes                   | 2,71E-07 |           | -1,23 | 23  |
| Tissue Development              | binding of T lymphocytes                    | 2,79E-07 |           | -1,58 | 22  |
| Tissue Development              | generation of T lymphocytes                 | 5,16E-07 |           | -1,83 | 25  |
| Tissue Development              | generation of lymphocytes                   | 1,06E-06 |           | -1,74 | 28  |
| Tissue Development              | interaction of T lymphocytes                | 1,07E-06 | Decreased | -2,00 | 25  |
| Tissue Development              | interaction of leukocytes                   | 1,17E-06 |           | -1,77 | 26  |
| Tissue Development              | adhesion of immune cells                    | 2,10E-06 |           | 0,14  | 63  |
| Tissue Development              | accumulation of leukocytes                  | 2,86E-06 |           | 0,11  | 45  |
| Tissue Development              | accumulation of blood cells                 | 4,26E-06 |           | 0,23  | 46  |
| Tissue Development              | generation of helper T lymphocytes          | 9,73E-06 | Decreased | -2,37 | 13  |
| Tissue Development              | generation of leukocytes                    | 1,02E-05 | Decreased | -2,09 | 29  |
| Tissue Development              | adhesion of T lymphocytes                   | 1,27E-05 |           | 0,68  | 22  |
| Tissue Development              | accumulation of myeloid cells               | 1,28E-05 |           | 0,02  | 31  |
| Tissue Development              | development of thymus gland                 | 5,77E-05 |           | -1,22 | 27  |
| Tissue Development              | adhesion of lymphocytes                     | 8,15E-05 |           | 0,56  | 24  |
| Tissue Development              | accumulation of phagocytes                  | 1,05E-04 |           | 0,12  | 25  |
| Tissue Development              | adhesion of mononuclear leukocytes          | 1,10E-04 |           | 0,32  | 28  |
| Tissue Development              | involution of organ                         | 1,19E-04 |           |       | 8   |
| Tissue Development              | morphology of germinal center               | 1,32E-04 |           |       | 17  |
| Tissue Development              | generation of Th1 cells                     | 1,62E-04 |           | -1,93 | 6   |
| Tissue Development              | abnormal morphology of germinal center      | 1,63E-04 |           |       | 14  |
| Tissue Development              | accumulation of T lymphocytes               | 1,99E-04 |           | -0,21 | 17  |
| Tissue Development              | binding of granulocytes                     | 2,84E-04 |           | -0,28 | 15  |
| Tissue Morphology               | quantity of leukocytes                      | 8,73E-29 | Decreased | -4,69 | 208 |
| Tissue Morphology               | quantity of blood cells                     | 1,04E-27 | Decreased | -4,76 | 225 |
| Tissue Morphology               | quantity of mononuclear leukocytes          | 6,47E-26 | Decreased | -5,18 | 172 |
| Tissue Morphology               | quantity of lymphocytes                     | 2,35E-24 | Decreased | -4,80 | 164 |
| Tissue Morphology               | quantity of T lymphocytes                   | 2,45E-21 | Decreased | -4,33 | 127 |
| Tissue Morphology               | quantity of cells                           | 1,10E-16 | Decreased | -3,57 | 286 |
| Tissue Morphology               | quantity of helper T lymphocytes            | 3,75E-16 | Decreased | -2,95 | 54  |
| Tissue Morphology               | quantity of cytotoxic T cells               | 9,67E-14 |           | -0,56 | 43  |
| Tissue Morphology               | quantity of hematopoietic cells             | 7,26E-13 | Decreased | -2,94 | 98  |
| Tissue Morphology               | quantity of hematopoietic progenitor cells  | 1,06E-12 | Decreased | -2,88 | 97  |
| Tissue Morphology               | quantity of thymocytes                      | 3,07E-11 | Decreased | -2,10 | 59  |
| Tissue Morphology               | quantity of B lymphocytes                   | 6,32E-11 | Decreased | -2,93 | 74  |
| Tissue Morphology               | quantity of myeloid cells                   | 6,76E-10 |           | -1,50 | 70  |
| Tissue Morphology               | quantity of granulocytes                    | 8,61E-09 |           | -1,59 | 62  |
| Tissue Morphology               | quantity of phagocytes                      | 6,14E-07 | Decreased | -2,45 | 71  |
| Tissue Morphology               | quantity of natural killer cells            | 3,22E-06 | Decreased | -2,68 | 22  |
| Tissue Morphology               | quantity of lymphatic system cells          | 8,74E-06 |           | -1,98 | 48  |
| Tissue Morphology               | morphology of lymph node                    | 1,62E-05 |           |       | 32  |
| Tissue Morphology               | quantity of pre-T lymphocytes               | 1,77E-05 | Increased | 2,56  | 18  |
| Tissue Morphology               | quantity of neutrophils                     | 2,16E-05 |           | -0,82 | 39  |
| Tissue Morphology               | quantity of double-negative T lymphocyte    | 4,20E-05 | Increased | 2,52  | 17  |
| Tissue Morphology               | abnormal morphology of lymph node           | 5,74E-05 |           |       | 29  |
| Tissue Morphology               | quantity of eosinophils                     | 6,06E-05 |           | -1,32 | 23  |
| Tissue Morphology               | quantity of memory T lymphocytes            | 8,76E-05 |           | -1,11 | 15  |
| Tissue Morphology               | size of lesion                              | 1,37E-04 |           | -0,28 | 38  |



|                                |                                  |          |       |    |
|--------------------------------|----------------------------------|----------|-------|----|
| Tissue Morphology              | quantity of blood platelets      | 2,61E-04 | -0,04 | 23 |
| Tumor Morphology               | proliferation of tumor cells     | 1,19E-04 | 0,88  | 40 |
| Vitamin and Mineral Metabolism | mobilization of Ca <sup>2+</sup> | 6,22E-05 | -0,85 | 59 |
