# Supplementary material for: Early and dynamic changes in gene expression in septic shock patients: a genome-wide approach
Source: PubMed Central journal article supplement (PMC4512996; doi:10.1186/s40635-014-0020-3), 2014-08-20
Supplement: 40635_2014_20_MOESM5_ESM.pdf [file 40635_2014_20_MOESM5_ESM.pdf]

**Table S3. Significant “cell death” functions in septic shock patients over time compared to Healthy volu**

| Functions Annotation                           | H0       |                            |                        |          |                            |                        |
|------------------------------------------------|----------|----------------------------|------------------------|----------|----------------------------|------------------------|
|                                                | Low      |                            |                        | High     |                            |                        |
|                                                | p-Value  | Predicted Activation State | Bias-corrected z-score | p-Value  | Predicted Activation State | Bias-corrected z-score |
| activation-induced cell death                  | 7.71E-05 |                            | 0.619                  | 1.12E-04 |                            | -0.174                 |
| activation-induced cell death of lymphocytes   |          |                            |                        |          |                            |                        |
| activation-induced cell death of T lymphocytes |          |                            |                        |          |                            |                        |
| apoptosis                                      | 3.90E-16 |                            | 0.867                  | 1.47E-16 |                            | -0.258                 |
| apoptosis of airway epithelial cells           |          |                            |                        |          |                            |                        |
| apoptosis of B lymphocytes                     | 1.57E-05 |                            | 1.298                  |          |                            |                        |
| apoptosis of bladder cancer cell lines         | 3.42E-04 |                            | 1.154                  |          |                            |                        |
| apoptosis of blood cells                       | 8.75E-17 |                            | 1.289                  | 1.60E-14 |                            | 0.377                  |
| apoptosis of breast cancer cell lines          |          |                            |                        |          |                            |                        |
| apoptosis of epithelial cells                  |          |                            |                        |          |                            |                        |
| apoptosis of colon cancer cell lines           |          |                            |                        | 1.75E-04 |                            | -0.702                 |
| apoptosis of epithelial cells                  | 1.54E-04 |                            | -0.230                 |          |                            |                        |
| apoptosis of granulocytes                      | 2.80E-08 |                            | -0.072                 |          |                            |                        |
| apoptosis of hematopoietic cells               | 1.05E-06 |                            | 0.376                  |          |                            |                        |
| apoptosis of hematopoietic progenitor cells    | 4.79E-07 |                            | 0.262                  | 6.32E-07 |                            | 0.182                  |
| apoptosis of leukemia cell lines               | 2.65E-11 |                            | 1.052                  | 4.19E-07 |                            | 1.149                  |
| apoptosis of leukocytes                        | 2.64E-17 |                            | 1.451                  | 2.17E-14 |                            | 0.564                  |
| apoptosis of lung cancer cell lines            |          |                            |                        |          |                            |                        |
| apoptosis of lung cell lines                   |          |                            |                        |          |                            |                        |
| apoptosis of lymphoblasts                      | 6.82E-05 |                            | 0.825                  |          |                            |                        |
| apoptosis of lymphocytes                       | 9.41E-12 |                            | 1.500                  | 6.00E-09 |                            | 0.541                  |
| apoptosis of lymphoid organ                    | 2.37E-06 |                            | 0.727                  | 3.28E-05 |                            | 0.661                  |
| apoptosis of lymphoma cell lines               | 6.20E-07 | Increased                  | 2.173                  | 2.13E-05 |                            | 1.952                  |
| apoptosis of macrophages                       | 1.66E-04 |                            | 1.836                  |          |                            |                        |
| apoptosis of mononuclear leukocytes            | 3.48E-12 |                            | 1.851                  | 8.37E-10 |                            | 0.778                  |
| apoptosis of muscle cells                      |          |                            |                        |          |                            |                        |
| apoptosis of myeloid cells                     | 3.08E-10 |                            | 1.295                  | 1.18E-06 |                            | 0.459                  |
| apoptosis of neutrophils                       | 3.53E-07 |                            | -1.252                 |          |                            |                        |
| apoptosis of organ                             | 2.53E-06 |                            | -0.027                 | 2.66E-05 |                            | -0.497                 |
| apoptosis of peripheral blood leukocytes       |          |                            |                        |          |                            |                        |
| apoptosis of ovarian cancer cell lines         |          |                            |                        |          |                            |                        |
| apoptosis of phagocytes                        | 5.02E-08 |                            | 0.656                  | 2.54E-05 |                            | -0.002                 |
| apoptosis of pre-B lymphocytes                 |          |                            |                        |          |                            |                        |
| apoptosis of prostate cancer cell lines        |          |                            |                        | 1.47E-04 |                            | -0.124                 |
| apoptosis of T lymphocytes                     | 7.56E-11 |                            | 0.710                  | 1.69E-08 |                            | 0.062                  |
| apoptosis of thymocytes                        | 7.04E-08 |                            | 0.708                  | 1.95E-06 |                            | 0.684                  |
| apoptosis of tumor cell lines                  | 7.24E-10 |                            | 1.499                  | 9.74E-10 |                            | 0.088                  |
| cell death                                     | 3.68E-15 |                            | 0.591                  | 1.06E-20 |                            | -0.167                 |
| cell death of B lymphocytes                    | 1.42E-05 |                            | 1.159                  |          |                            |                        |
| cell death of bladder cancer cell lines        | 7.69E-05 |                            | 0.849                  |          |                            |                        |
| cell death of blood cells                      | 3.40E-20 | Increased                  | 2.336                  | 5.54E-20 |                            | 0.945                  |
| cell death of breast cancer cell lines         |          |                            |                        |          |                            |                        |
| cell death of bronchial epithelial cells       |          |                            |                        |          |                            |                        |
| cell death of cancer cells                     |          |                            |                        | 8.04E-05 |                            | -1.944                 |

|                                                   |          |           |        |          |                  |
|---------------------------------------------------|----------|-----------|--------|----------|------------------|
| cell death of colon cancer cell lines             |          |           | 0.741  | 1.96E-04 | -0.718           |
| cell death of epithelial cells                    |          |           |        |          |                  |
| cell death of granulocytes                        | 1.61E-08 |           | 0.397  |          |                  |
| cell death of connective tissue cells             |          |           |        |          |                  |
| cell death of fibroblast cell lines               |          |           |        |          |                  |
| cell death of hematopoietic cells                 | 2.30E-05 |           | 0.284  |          |                  |
| cell death of hematopoietic progenitor cells      | 1.32E-05 |           | 2.580  | 6.17E-06 | -0.012           |
| cell death of immune cells                        | 3.56E-21 | Increased | 1.116  | 5.47E-20 | 1.134            |
| cell death of leukemia cell lines                 | 9.35E-13 |           | 1.809  | 4.93E-09 | 0.896            |
| cell death of leukocyte cell lines                | 2.70E-04 |           | 2.155  |          |                  |
| cell death of lung cancer cell lines              |          |           |        |          |                  |
| cell death of lung cells                          |          |           |        |          |                  |
| cell death of lymphocytes                         | 3.38E-13 | Increased | 0.553  | 6.15E-11 | 0.793            |
| cell death of lymphoid organ                      | 1.18E-05 |           | 1.169  | 4.50E-05 | 0.259            |
| cell death of lymphoma cell lines                 | 1.23E-08 |           | 2.639  | 3.91E-07 | 0.803            |
| cell death of macrophages                         | 2.43E-04 | Increased | 2.524  |          |                  |
| cell death of lymphoma cells                      |          |           |        |          |                  |
| cell death of mononuclear leukocytes              | 1.24E-13 | Increased | 2.517  | 8.08E-12 | 1.052            |
| cell death of muscle cells                        |          |           |        |          |                  |
| cell death of myeloid cells                       | 5.48E-10 | Increased | 1.618  | 1.17E-06 | 1.267            |
| cell death of organ                               | 1.10E-04 |           | 1.720  | 7.29E-05 | 0.947            |
| cell death of peripheral blood leukocytes         |          |           |        |          |                  |
| cell death of phagocytes                          | 9.13E-08 |           | 1.349  | 3.10E-05 | 0.662            |
| cell death of prostate cancer cell lines          |          |           |        | 1.23E-04 | -0.369           |
| cell death of T lymphocytes                       | 4.59E-12 |           | 0.686  | 7.46E-10 | 0.373            |
| cell death of thymocytes                          | 1.15E-06 |           | 1.044  | 6.55E-06 | 0.429            |
| cell death of tumor cell lines                    | 2.34E-09 |           | 0.063  | 5.46E-11 | -0.362           |
| cell death of tumor cells                         |          |           |        | 5.27E-05 | -1.820           |
| cell survival                                     | 5.67E-06 |           | 1.060  | 1.71E-08 | 1.109            |
| cell viability                                    |          |           |        |          |                  |
| cell viability of B-lymphocyte derived cell lines |          |           |        |          |                  |
| cell viability of cervical cancer cell lines      |          |           |        |          |                  |
| cell viability of tumor cell lines                |          |           |        |          |                  |
| clearance of cells                                | 5.72E-06 |           | -0.385 | 4.48E-05 | 0.502            |
| cytolysis                                         | 7.06E-09 |           | -1.112 | 6.22E-08 | -1.106           |
| cytolysis of blood cells                          | 3.30E-06 |           |        | 2.52E-05 | -1.768           |
| cytolysis of leukocyte cell lines                 |          |           |        | 2.08E-04 | 0.982            |
| cytolysis of leukocytes                           |          |           |        | 1.16E-05 | -1.731           |
| cytolysis of lymphocytes                          | 2.30E-06 |           | -0.106 | 3.10E-05 |                  |
| cytolysis of natural killer cells                 | 1.84E-05 |           | -0.076 |          |                  |
| cytolysis of T lymphocytes                        |          |           |        | 1.64E-04 |                  |
| cytolysis of tumor cell lines                     | 1.61E-06 |           | -0.128 | 1.69E-04 | -0.378           |
| cytotoxicity                                      | 9.65E-13 |           | -0.386 | 2.06E-13 | -1.150           |
| cytotoxicity of cells                             | 4.23E-11 |           | -0.902 | 1.15E-11 | -1.246           |
| cytotoxicity of leukocytes                        | 2.95E-11 |           | -0.541 | 1.37E-11 | -1.552           |
| cytotoxicity of lymphocytes                       | 4.52E-10 |           | -0.985 | 6.36E-11 | Decreased -2.111 |
| cytotoxicity of natural killer cells              | 3.54E-09 |           | 0.175  | 3.93E-09 | -1.959           |
| cytotoxicity of T lymphocytes                     | 3.56E-05 |           | -0.816 | 1.68E-04 | -1.189           |
| inhibition of apoptosis                           |          |           |        |          |                  |
| killing of cells                                  | 2.21E-11 |           | -1.130 | 1.88E-09 | 0.371            |
| killing of hematopoietic cells                    | 1.85E-04 |           | -0.694 | 1.23E-04 | -0.931           |
| killing of leukocytes                             | 1.96E-08 |           | -0.583 | 2.26E-07 | -1.610           |

|                                               |          |        |          |        |
|-----------------------------------------------|----------|--------|----------|--------|
| killing of lymphocytes                        | 8.94E-08 | -1.103 | 1.62E-06 | -1.092 |
| killing of lymphoma cell lines                |          |        |          |        |
| killing of natural killer cells               | 2.02E-04 |        | 1.24E-04 | -0.899 |
| killing of splenocytes                        |          |        |          |        |
| killing of T lymphocytes                      | 3.55E-07 | 1.210  | 1.24E-04 | -1.231 |
| killing of tumor cell lines                   |          |        |          |        |
| killing of tumor cells                        | 2.54E-04 | 1.296  |          |        |
| pyroptosis of bone marrow-derived macrophages | 1.48E-04 | -0.034 |          |        |
| removal of cells                              | 1.87E-06 | 0.003  | 1.33E-05 | 0.783  |
| survival of B lymphocytes                     |          |        |          |        |
| survival of blood cells                       | 2.45E-05 | -0.108 | 9.46E-05 | 0.251  |
| survival of epithelial cells                  |          |        |          |        |
| survival of leukocytes                        | 3.68E-05 | -0.250 | 3.42E-04 | -0.193 |
| survival of lymphocytes                       | 2.60E-04 | 1.193  |          |        |
| survival of mononuclear leukocytes            | 2.76E-04 |        |          |        |
| toxicity of cells                             | 1.48E-04 |        |          |        |

nters. The table shows the predicted activation or inhibition status of the enriched functions in SAPSII-Low

| H24      |                            |                        |          |                            |                        | H48      |                            |                        |          |                            |
|----------|----------------------------|------------------------|----------|----------------------------|------------------------|----------|----------------------------|------------------------|----------|----------------------------|
| Low      |                            |                        | High     |                            |                        | Low      |                            |                        | High     |                            |
| p-Value  | Predicted Activation State | Bias-corrected z-score | p-Value  | Predicted Activation State | Bias-corrected z-score | p-Value  | Predicted Activation State | Bias-corrected z-score | p-Value  | Predicted Activation State |
| 4.89E-05 |                            | 0.628                  | 6.08E-05 |                            | -0.238                 | 4.69E-06 |                            | 0.117                  | 1.71E-05 |                            |
| 2.37E-04 |                            | 0.399                  | 2.80E-04 |                            | 0.325                  | 7.76E-06 |                            | 0.038                  | 1.10E-04 |                            |
|          |                            |                        |          |                            |                        | 6.09E-05 |                            | 0.008                  |          |                            |
| 4.79E-16 |                            | 1.367                  | 9.92E-15 |                            | 0.857                  | 1.98E-14 |                            | 1.931                  | 6.16E-16 |                            |
| 7.90E-05 |                            | -0.821                 |          |                            |                        | 2.47E-05 |                            | -0.849                 |          |                            |
| 2.60E-06 |                            | -0.735                 | 5.47E-05 |                            | 0.398                  | 5.24E-06 |                            | -0.871                 | 2.53E-04 |                            |
|          |                            |                        |          |                            |                        |          |                            |                        |          |                            |
| 8.10E-16 |                            | 0.740                  | 3.62E-16 |                            | 1.533                  | 1.15E-19 |                            | 0.497                  | 1.23E-15 |                            |
| 2.37E-05 |                            | 1.211                  | 3.38E-04 |                            | -0.703                 |          |                            |                        | 3.26E-04 |                            |
|          |                            |                        |          |                            |                        | 1.72E-05 |                            | -0.953                 | 1.07E-04 |                            |
|          |                            |                        |          |                            |                        |          |                            |                        |          |                            |
| 8.72E-07 |                            | -0.162                 |          |                            |                        |          |                            |                        |          |                            |
| 9.13E-06 |                            | -0.050                 | 2.06E-04 |                            | 0.455                  | 5.75E-07 |                            | -0.067                 | 1.82E-04 |                            |
| 1.78E-05 |                            | 0.314                  | 2.81E-06 |                            | 0.604                  | 1.00E-07 |                            | -0.081                 | 1.67E-06 |                            |
| 1.18E-05 |                            | 0.175                  | 7.59E-06 |                            | 0.567                  | 6.61E-08 |                            | -0.251                 | 2.08E-06 |                            |
| 1.66E-13 | Increased                  | 2.062                  | 9.56E-09 |                            | 1.155                  | 3.13E-12 |                            | 1.739                  | 4.03E-12 |                            |
| 2.83E-17 |                            | 0.721                  | 2.27E-16 |                            | 1.596                  | 4.25E-21 |                            | 0.429                  | 1.25E-15 |                            |
| 3.53E-04 |                            | 1.002                  |          |                            |                        |          |                            |                        |          |                            |
| 1.13E-04 |                            | -0.197                 |          |                            |                        | 1.58E-04 |                            | -0.927                 |          |                            |
| 1.37E-04 |                            | 0.547                  | 1.13E-04 |                            | 0.988                  |          |                            |                        | 6.00E-05 |                            |
| 1.52E-12 |                            | 0.148                  | 6.88E-12 |                            | 0.830                  | 2.44E-15 |                            | -0.338                 | 1.90E-10 |                            |
| 7.66E-05 |                            | 0.801                  | 2.89E-05 |                            | 0.691                  | 2.78E-07 |                            | 0.530                  | 7.86E-05 |                            |
| 1.03E-04 |                            | 1.255                  | 2.24E-05 |                            | 1.821                  | 1.17E-05 |                            | 1.695                  | 2.16E-05 |                            |
|          |                            |                        |          |                            |                        |          |                            |                        |          |                            |
| 3.60E-13 |                            | 0.481                  | 2.91E-12 |                            | 1.191                  | 3.84E-16 |                            | 0.072                  | 2.65E-11 |                            |
| 1.79E-04 |                            | -0.375                 |          |                            |                        | 6.10E-05 |                            | -0.811                 |          |                            |
| 5.57E-08 |                            | 1.497                  | 8.49E-08 |                            | 1.962                  | 2.21E-08 |                            | 1.489                  | 1.73E-07 |                            |
| 1.40E-04 |                            | -0.907                 |          |                            |                        | 1.96E-05 |                            | -0.886                 |          |                            |
| 3.15E-07 |                            | 0.149                  | 1.45E-05 |                            | -0.502                 | 1.40E-08 |                            | 0.163                  | 5.48E-06 |                            |
|          |                            |                        |          |                            |                        | 1.15E-04 |                            | 1.002                  |          |                            |
| 4.23E-04 |                            | 0.326                  |          |                            |                        |          |                            |                        |          |                            |
| 4.76E-06 |                            | 1.197                  | 6.38E-06 |                            | 1.707                  | 2.31E-06 |                            | 1.164                  | 2.86E-05 |                            |
|          |                            |                        |          |                            |                        | 2.61E-04 |                            | -1.904                 |          |                            |
|          |                            |                        |          |                            |                        |          |                            |                        |          |                            |
| 1.05E-11 |                            | 0.060                  | 7.56E-11 |                            | 0.083                  | 1.75E-14 |                            | -0.364                 | 1.00E-10 |                            |
| 7.79E-06 |                            | 0.865                  | 1.18E-06 |                            | 0.713                  | 1.71E-08 |                            | 0.418                  | 4.99E-06 |                            |
| 1.46E-10 |                            | 1.839                  | 2.51E-10 |                            | 1.827                  | 3.35E-09 |                            | 1.668                  | 7.04E-13 |                            |
| 1.59E-14 |                            | 0.713                  | 1.17E-16 |                            | 0.172                  | 8.45E-14 |                            | 0.886                  | 9.64E-18 |                            |
| 1.71E-06 |                            | -0.676                 | 5.25E-05 |                            | 0.279                  | 2.55E-06 |                            | -0.776                 | 2.02E-04 |                            |
|          |                            |                        |          |                            |                        |          |                            |                        |          |                            |
| 3.89E-20 |                            | 1.188                  | 3.30E-21 |                            | 1.661                  | 1.94E-23 |                            | 0.859                  | 1.05E-19 |                            |
| 2.40E-04 |                            | 1.101                  |          |                            |                        |          |                            |                        |          |                            |
| 2.33E-04 |                            | -0.007                 |          |                            |                        | 9.88E-05 |                            | -0.049                 |          |                            |

|          |           |          |           |           |          |          |           |          |           |           |
|----------|-----------|----------|-----------|-----------|----------|----------|-----------|----------|-----------|-----------|
| 2.46E-04 | 0.747     | 1.28E-04 | 0.900     |           |          |          |           |          |           |           |
|          |           |          |           |           |          |          |           | 3.87E-04 |           |           |
|          |           |          |           |           |          |          |           | 3.92E-04 |           |           |
| 1.63E-04 | 0.527     | 5.88E-06 | 0.696     | 1.33E-06  | 0.110    |          |           | 2.79E-06 |           |           |
| 1.24E-04 | 0.392     | 1.54E-05 | 0.660     | 1.02E-06  | -0.053   |          |           | 3.58E-06 |           |           |
| 1.07E-21 | 1.191     | 6.49E-22 | 1.787     | 5.99E-25  | 0.805    |          |           | 8.65E-20 |           |           |
| 1.33E-15 | 1.786     | 9.57E-12 | 0.958     | 1.16E-13  | 1.595    |          |           | 4.00E-14 |           |           |
| 2.60E-04 | 0.847     |          |           |           |          |          |           |          |           |           |
| 2.84E-04 | 0.401     |          |           |           |          |          |           |          |           |           |
| 3.14E-14 | 1.039     | 1.54E-13 | 1.355     | 4.72E-17  | 0.650    |          |           | 8.94E-13 |           |           |
| 3.94E-04 | 0.724     | 2.34E-05 | 0.509     | 2.13E-06  | 0.441    |          |           | 4.81E-05 |           |           |
| 8.06E-06 | 0.107     | 1.03E-07 | 0.352     | 1.31E-06  | 0.538    |          |           | 1.31E-06 |           |           |
|          |           |          |           | 1.76E-04  | 0.452    |          |           |          |           |           |
| 2.42E-15 | 1.339     | 6.46E-14 | 1.780     | 2.06E-18  | 1.012    |          |           | 1.18E-13 |           |           |
| 1.31E-04 | -0.076    |          |           | 8.88E-05  | -0.466   |          |           |          |           |           |
| 4.21E-08 | Increased | 2.520    | 4.90E-08  | Increased | 2.700    | 1.10E-08 | Increased | 2.494    | 7.57E-08  | Increased |
| 3.34E-05 |           | 1.258    | 3.68E-04  |           | 0.879    | 5.89E-05 |           | 0.967    | 4.28E-04  |           |
|          |           |          |           |           |          | 7.12E-05 |           | 1.186    |           |           |
| 4.82E-06 | Increased | 2.035    | 4.32E-06  | Increased | 2.348    | 1.81E-06 |           | 1.979    | 1.61E-05  |           |
| 5.03E-13 | 0.904     | 3.14E-13 | 0.677     | 1.09E-15  | 0.570    |          |           | 2.24E-13 |           |           |
|          |           | 2.06E-06 | 0.681     |           |          |          |           | 6.24E-06 |           |           |
| 5.18E-10 | 0.812     | 1.74E-10 | 0.993     | 4.34E-09  | 0.582    |          |           | 5.87E-12 |           |           |
|          |           |          |           | 1.39E-04  | -1.260   |          |           |          |           |           |
| 6.90E-07 | -0.373    | 1.94E-07 | 0.330     | 4.47E-08  | -0.497   |          |           | 7.55E-08 |           |           |
| 1.96E-04 | 1.260     |          |           | 4.63E-05  | 0.999    |          |           |          |           |           |
|          |           |          |           | 2.09E-04  | -0.661   |          |           |          |           |           |
|          |           |          |           | 1.76E-04  | -1.303   |          |           |          |           |           |
| 1.23E-04 | 1.024     |          |           |           |          |          |           |          |           |           |
| 2.65E-05 | 1.788     | 3.54E-06 | 0.899     | 1.55E-05  | 0.540    |          |           |          |           |           |
| 2.98E-11 | -0.014    | 2.54E-08 | -1.606    | 1.82E-13  | -0.004   |          |           | 1.15E-08 |           |           |
| 9.27E-08 | -0.915    | 1.55E-06 | Decreased | -2.089    | 7.50E-09 | -0.746   |           | 7.25E-07 |           |           |
|          |           | 8.68E-07 |           | -1.776    |          |          |           | 2.13E-06 |           |           |
| 1.34E-07 |           | 2.39E-06 |           |           | 2.17E-08 | -0.406   |           | 5.91E-06 |           |           |
| 2.05E-05 |           | 4.56E-05 |           |           | 1.21E-05 |          |           |          |           |           |
| 3.00E-05 |           |          |           |           | 2.50E-05 | -0.333   |           | 2.60E-04 |           |           |
| 3.78E-05 | -0.421    | 1.18E-04 | -1.104    | 6.91E-06  | -0.582   |          |           | 4.98E-05 |           |           |
| 3.31E-14 | -0.666    | 1.71E-13 | -1.173    | 5.78E-17  | -1.437   |          |           | 4.46E-13 |           |           |
| 8.40E-13 | -0.567    | 6.66E-12 | -1.251    | 1.29E-16  | -1.376   |          |           | 6.40E-12 |           |           |
| 4.58E-12 | -0.775    | 5.84E-12 | -1.397    | 6.82E-17  | -1.241   |          |           | 4.07E-12 | Decreased |           |
| 3.12E-11 | -1.212    | 1.97E-11 | -1.885    | 7.34E-16  | -1.626   |          |           | 4.08E-12 | Decreased |           |
| 1.33E-08 | -0.711    | 8.45E-10 | -1.617    | 8.52E-12  | -1.103   |          |           | 2.36E-09 |           |           |
| 1.15E-06 | -1.269    | 2.91E-05 | -1.109    | 1.14E-08  | -1.537   |          |           | 7.57E-06 |           |           |
|          |           |          |           | 6.69E-05  |          |          |           |          |           |           |
| 5.02E-11 | -0.395    | 2.38E-10 | -0.343    | 3.40E-14  | -0.684   |          |           | 2.16E-09 |           |           |
|          |           | 2.81E-05 | -1.226    |           |          |          |           | 1.65E-04 |           |           |
| 7.02E-05 | -1.339    | 3.60E-07 | -1.741    | 1.74E-06  | -1.835   |          |           | 4.64E-07 |           |           |

|          |                  |          |        |          |                  |          |
|----------|------------------|----------|--------|----------|------------------|----------|
| 2.33E-04 | -1.053           | 2.49E-07 | -0.982 | 7.72E-06 | -1.544           | 4.72E-07 |
|          |                  | 7.01E-06 | -0.756 |          |                  | 5.10E-04 |
| 2.77E-04 | Decreased -2.001 | 3.46E-04 | -1.300 | 1.37E-04 | Decreased -2.289 | 2.50E-05 |
| 3.01E-04 | -0.756           |          |        | 5.44E-05 | -0.882           | 1.77E-04 |
|          |                  | 5.54E-06 | 1.160  |          |                  |          |
|          |                  | 2.25E-04 | 0.730  |          |                  |          |
| 1.94E-05 | -1.154           | 3.59E-05 | -0.463 | 1.95E-07 | -1.588           | 5.20E-04 |
| 9.97E-05 | 0.887            |          |        |          |                  |          |
| 9.10E-06 | -1.192           | 9.98E-06 | -0.595 | 7.71E-07 | -1.618           | 2.22E-04 |
| 3.53E-04 | -1.663           |          |        | 1.27E-04 | -1.863           |          |
| 3.20E-04 | -1.814           | 2.13E-04 | -0.957 | 3.89E-05 | Decreased -2.197 |          |

and High p

| Bias-corrected z-score |
|------------------------|
| -0.276                 |
| 0.279                  |
| 1.161                  |
| 0.150                  |
| 0.888                  |
| -0.502                 |
| -0.695                 |
| 0.066                  |
| 0.587                  |
| 0.658                  |
| 1.361                  |
| 0.909                  |
| 0.930                  |
| 0.558                  |
| 0.948                  |
| 1.441                  |
| 0.837                  |
| 1.079                  |
| -0.179                 |
| 0.860                  |
| -0.273                 |
| 0.788                  |
| 1.911                  |
| 0.429                  |
| 0.145                  |
| 1.510                  |

-1.165  
-1.361  
0.667  
0.735  
1.565  
1.140

1.553  
0.730  
0.193

1.853

2.141  
0.795

1.823

0.715  
0.733  
1.189

-0.259

-1.506  
-1.172

-1.153

-1.176  
-1.783  
-1.747  
-2.212  
-2.515  
-1.962  
-1.877

0.340  
-1.138  
-1.386



-0.945

-0.878

-0.653

-1.431

-0.643

-0.683
