# Supplementary material for: Early and dynamic changes in gene expression in septic shock patients: a genome-wide approach
Source: PubMed Central journal article supplement (PMC4512996; doi:10.1186/s40635-014-0020-3), 2014-08-20
Supplement: 40635_2014_20_MOESM6_ESM.pdf [file 40635_2014_20_MOESM6_ESM.pdf]

**Table S4. Significant categories enriched by the 142 probesets differentially expressed between**

© 2000-2012 Ingenuity Systems, Inc. All rights reserved.

| Category                                      | Functions Annotation                      | p-Value  |
|-----------------------------------------------|-------------------------------------------|----------|
| Cancer                                        | Cancer                                    | 4.54E-14 |
| Infectious Disease                            | Viral Infection                           | 6.02E-13 |
| Infectious Disease                            | infection of mammalia                     | 1.84E-12 |
| Cell Morphology                               | morphology of T lymphocytes               | 2.55E-11 |
| Hematological System Development and Function | morphology of T lymphocytes               | 2.55E-11 |
| Cell Morphology                               | morphology of lymphocytes                 | 3.25E-11 |
| Dermatological Diseases and Conditions        | psoriasis                                 | 3.96E-11 |
| Hematological System Development and Function | activation of blood cells                 | 3.29E-10 |
| Cell-To-Cell Signaling and Interaction        | activation of blood cells                 | 3.29E-10 |
| Immunological Disease                         | systemic autoimmune syndrome              | 3.52E-10 |
| Cell Death and Survival                       | cell death of immune cells                | 1.46E-09 |
| Immunological Disease                         | experimental autoimmune encephalomyelitis | 1.81E-09 |
| Inflammatory Disease                          | experimental autoimmune encephalomyelitis | 1.81E-09 |
| Neurological Disease                          | experimental autoimmune encephalomyelitis | 1.81E-09 |
| Cancer                                        | epithelial tumor                          | 1.93E-09 |
| Cellular Function and Maintenance             | cellular homeostasis                      | 1.94E-09 |
| Cell Morphology                               | morphology of leukocytes                  | 2.22E-09 |
| Cancer                                        | carcinoma                                 | 2.53E-09 |
| Cell Morphology                               | abnormal morphology of T lymphocytes      | 2.67E-09 |
| Hematological System Development and Function | abnormal morphology of T lymphocytes      | 2.67E-09 |
| Hematological System Development and Function | activation of leukocytes                  | 2.91E-09 |
| Cell-To-Cell Signaling and Interaction        | activation of leukocytes                  | 2.91E-09 |
| Immune Cell Trafficking                       | activation of leukocytes                  | 2.91E-09 |
| Inflammatory Response                         | activation of leukocytes                  | 2.91E-09 |
| Immunological Disease                         | rheumatoid arthritis                      | 3.08E-09 |
| Inflammatory Disease                          | rheumatoid arthritis                      | 3.08E-09 |
| Connective Tissue Disorders                   | rheumatoid arthritis                      | 3.08E-09 |
| Skeletal and Muscular Disorders               | rheumatoid arthritis                      | 3.08E-09 |
| Cancer                                        | solid tumor                               | 3.31E-09 |
| Cell Morphology                               | abnormal morphology of leukocytes         | 3.88E-09 |
| Cell Morphology                               | morphology of blood cells                 | 5.75E-09 |
| Inflammatory Disease                          | arthritis                                 | 6.67E-09 |
| Connective Tissue Disorders                   | arthritis                                 | 6.67E-09 |
| Skeletal and Muscular Disorders               | arthritis                                 | 6.67E-09 |
| Cellular Function and Maintenance             | function of leukocytes                    | 7.83E-09 |
| Cell-To-Cell Signaling and Interaction        | activation of cells                       | 1.01E-08 |
| Inflammatory Disease                          | Inflammatory Bowel Disease                | 1.36E-08 |
| Gastrointestinal Disease                      | Inflammatory Bowel Disease                | 1.36E-08 |
| Neurological Disease                          | neuromuscular disease                     | 1.59E-08 |
| Skeletal and Muscular Disorders               | neuromuscular disease                     | 1.59E-08 |
| Cell Morphology                               | abnormal morphology of lymphocytes        | 1.66E-08 |
| Inflammatory Disease                          | Rheumatic Disease                         | 1.72E-08 |
| Connective Tissue Disorders                   | Rheumatic Disease                         | 1.72E-08 |
| Skeletal and Muscular Disorders               | Rheumatic Disease                         | 1.72E-08 |
| Hematological System Development and Function | development of blood cells                | 3.29E-08 |
| Cellular Development                          | development of blood cells                | 3.29E-08 |
| Hematopoiesis                                 | development of blood cells                | 3.29E-08 |
| Dermatological Diseases and Conditions        | lichen planus                             | 6.25E-08 |

|                                               |                                        |          |
|-----------------------------------------------|----------------------------------------|----------|
| Immunological Disease                         | lichen planus                          | 6.25E-08 |
| Inflammatory Disease                          | lichen planus                          | 6.25E-08 |
| Hematological System Development and Function | development of lymphocytes             | 6.57E-08 |
| Cellular Development                          | development of lymphocytes             | 6.57E-08 |
| Hematopoiesis                                 | development of lymphocytes             | 6.57E-08 |
| Lymphoid Tissue Structure and Development     | development of lymphocytes             | 6.57E-08 |
| Hematological System Development and Function | T cell development                     | 9.04E-08 |
| Cellular Function and Maintenance             | T cell development                     | 9.04E-08 |
| Cellular Development                          | T cell development                     | 9.04E-08 |
| Hematopoiesis                                 | T cell development                     | 9.04E-08 |
| Lymphoid Tissue Structure and Development     | T cell development                     | 9.04E-08 |
| Cell-mediated Immune Response                 | T cell development                     | 9.04E-08 |
| Immunological Disease                         | hypersensitive reaction                | 1.10E-07 |
| Inflammatory Response                         | inflammation of organ                  | 1.13E-07 |
| Cellular Development                          | differentiation of cells               | 1.29E-07 |
| Gastrointestinal Disease                      | diabetes mellitus                      | 1.69E-07 |
| Endocrine System Disorders                    | diabetes mellitus                      | 1.69E-07 |
| Metabolic Disease                             | diabetes mellitus                      | 1.69E-07 |
| Cell Death and Survival                       | apoptosis of leukocytes                | 2.07E-07 |
| Hematological System Development and Function | quantity of blood cells                | 2.31E-07 |
| Tissue Morphology                             | quantity of blood cells                | 2.31E-07 |
| Cell Death and Survival                       | cell death                             | 2.71E-07 |
| Cancer                                        | hematological neoplasia                | 2.96E-07 |
| Hematological Disease                         | hematological neoplasia                | 2.96E-07 |
| Cell Death and Survival                       | apoptosis                              | 3.03E-07 |
| Cellular Development                          | proliferation of blood cells           | 3.68E-07 |
| Cellular Growth and Proliferation             | proliferation of blood cells           | 3.68E-07 |
| Hematological System Development and Function | quantity of leukocytes                 | 4.10E-07 |
| Tissue Morphology                             | quantity of leukocytes                 | 4.10E-07 |
| Hematological System Development and Function | quantity of cytotoxic T cells          | 4.20E-07 |
| Tissue Morphology                             | quantity of cytotoxic T cells          | 4.20E-07 |
| Hematological System Development and Function | proliferation of lymphocytes           | 4.23E-07 |
| Cellular Development                          | proliferation of lymphocytes           | 4.23E-07 |
| Cellular Growth and Proliferation             | proliferation of lymphocytes           | 4.23E-07 |
| Hematological System Development and Function | proliferation of immune cells          | 5.56E-07 |
| Cellular Development                          | proliferation of immune cells          | 5.56E-07 |
| Cellular Growth and Proliferation             | proliferation of immune cells          | 5.56E-07 |
| Cellular Growth and Proliferation             | proliferation of cells                 | 5.91E-07 |
| Cancer                                        | renal cancer                           | 6.57E-07 |
| Renal and Urological Disease                  | renal cancer                           | 6.57E-07 |
| Hematological System Development and Function | activation of antigen presenting cells | 6.88E-07 |
| Cell-To-Cell Signaling and Interaction        | activation of antigen presenting cells | 6.88E-07 |
| Immune Cell Trafficking                       | activation of antigen presenting cells | 6.88E-07 |
| Inflammatory Response                         | activation of antigen presenting cells | 6.88E-07 |
| Inflammatory Disease                          | multiple sclerosis                     | 6.93E-07 |
| Neurological Disease                          | multiple sclerosis                     | 6.93E-07 |
| Skeletal and Muscular Disorders               | multiple sclerosis                     | 6.93E-07 |
| Neurological Disease                          | progressive motor neuropathy           | 7.11E-07 |
| Hematological System Development and Function | differentiation of blood cells         | 7.50E-07 |
| Cellular Development                          | differentiation of blood cells         | 7.50E-07 |
| Cellular Movement                             | cell movement                          | 7.95E-07 |
| Metabolic Disease                             | glucose metabolism disorder            | 8.63E-07 |

|                                               |                                           |          |
|-----------------------------------------------|-------------------------------------------|----------|
| Cell Death and Survival                       | cell viability                            | 1.25E-06 |
| Cell Death and Survival                       | cell survival                             | 1.65E-06 |
| Cellular Function and Maintenance             | function of phagocytes                    | 1.81E-06 |
| Cellular Movement                             | migration of cells                        | 1.83E-06 |
| Cancer                                        | genital tumor                             | 1.96E-06 |
| Reproductive System Disease                   | genital tumor                             | 1.96E-06 |
| Immunological Disease                         | insulin-dependent diabetes mellitus       | 1.97E-06 |
| Gastrointestinal Disease                      | insulin-dependent diabetes mellitus       | 1.97E-06 |
| Endocrine System Disorders                    | insulin-dependent diabetes mellitus       | 1.97E-06 |
| Metabolic Disease                             | insulin-dependent diabetes mellitus       | 1.97E-06 |
| Cancer                                        | lymphohematopoietic cancer                | 2.06E-06 |
| Cell Death and Survival                       | necrosis                                  | 2.08E-06 |
| Hematological System Development and Function | differentiation of mononuclear leukocytes | 2.10E-06 |
| Cellular Development                          | differentiation of mononuclear leukocytes | 2.10E-06 |
| Hematopoiesis                                 | differentiation of mononuclear leukocytes | 2.10E-06 |
| Immunological Disease                         | immediate hypersensitivity                | 2.59E-06 |
| Inflammatory Response                         | antiviral response                        | 2.65E-06 |
| Antimicrobial Response                        | antiviral response                        | 2.65E-06 |
| Inflammatory Disease                          | colitis                                   | 2.70E-06 |
| Inflammatory Response                         | colitis                                   | 2.70E-06 |
| Gastrointestinal Disease                      | colitis                                   | 2.70E-06 |
| Dermatological Diseases and Conditions        | Dermatitis                                | 2.88E-06 |
| Inflammatory Disease                          | Dermatitis                                | 2.88E-06 |
| Cell Death and Survival                       | apoptosis of mononuclear leukocytes       | 2.94E-06 |
| Hematological System Development and Function | differentiation of lymphocytes            | 2.94E-06 |
| Cellular Development                          | differentiation of lymphocytes            | 2.94E-06 |
| Hematopoiesis                                 | differentiation of lymphocytes            | 2.94E-06 |
| Hematological System Development and Function | cell movement of leukocytes               | 3.08E-06 |
| Immune Cell Trafficking                       | cell movement of leukocytes               | 3.08E-06 |
| Cellular Movement                             | cell movement of leukocytes               | 3.08E-06 |
| Cellular Movement                             | infiltration of cells                     | 3.61E-06 |
| Cell Morphology                               | morphology of cells                       | 4.23E-06 |
| Infectious Disease                            | Bacterial Infection                       | 5.29E-06 |
| Cancer                                        | hematologic cancer                        | 6.07E-06 |
| Hematological Disease                         | hematologic cancer                        | 6.07E-06 |
| Cell Death and Survival                       | cytotoxicity of cells                     | 6.56E-06 |
| Cancer                                        | uterine cancer                            | 6.88E-06 |
| Reproductive System Disease                   | uterine cancer                            | 6.88E-06 |
| Hematological System Development and Function | quantity of T lymphocytes                 | 7.61E-06 |
| Tissue Morphology                             | quantity of T lymphocytes                 | 7.61E-06 |
| Hematological System Development and Function | inhibition of leukocytes                  | 7.80E-06 |
| Cellular Growth and Proliferation             | inhibition of leukocytes                  | 7.80E-06 |
| Cancer                                        | gastrointestinal tract cancer             | 7.98E-06 |
| Gastrointestinal Disease                      | gastrointestinal tract cancer             | 7.98E-06 |
| Cancer                                        | uterine serous papillary cancer           | 9.89E-06 |
| Reproductive System Disease                   | uterine serous papillary cancer           | 9.89E-06 |
| Inflammatory Response                         | immune response of cells                  | 1.01E-05 |
| Cell Death and Survival                       | apoptosis of lymphocytes                  | 1.01E-05 |
| Dermatological Diseases and Conditions        | atopic dermatitis                         | 1.05E-05 |
| Immunological Disease                         | atopic dermatitis                         | 1.05E-05 |
| Inflammatory Disease                          | atopic dermatitis                         | 1.05E-05 |
| Cellular Function and Maintenance             | function of antigen presenting cells      | 1.15E-05 |

|                                               |                                           |          |
|-----------------------------------------------|-------------------------------------------|----------|
| Inflammatory Response                         | inflammatory response                     | 1.42E-05 |
| Tissue Morphology                             | quantity of cells                         | 1.57E-05 |
| Cell Death and Survival                       | cell death of T lymphocytes               | 1.69E-05 |
| Hematological System Development and Function | quantity of lymphocytes                   | 1.77E-05 |
| Tissue Morphology                             | quantity of lymphocytes                   | 1.77E-05 |
| Cellular Growth and Proliferation             | generation of leukocytes                  | 1.86E-05 |
| Tissue Development                            | generation of leukocytes                  | 1.86E-05 |
| Cellular Movement                             | transmigration of cells                   | 2.18E-05 |
| Hematological System Development and Function | cell movement of mononuclear leukocytes   | 2.39E-05 |
| Immune Cell Trafficking                       | cell movement of mononuclear leukocytes   | 2.39E-05 |
| Cellular Movement                             | cell movement of mononuclear leukocytes   | 2.39E-05 |
| Hematological System Development and Function | inhibition of mononuclear leukocytes      | 2.58E-05 |
| Cellular Growth and Proliferation             | inhibition of mononuclear leukocytes      | 2.58E-05 |
| Cell-To-Cell Signaling and Interaction        | detachment of corneocytes                 | 2.59E-05 |
| Tissue Development                            | detachment of corneocytes                 | 2.59E-05 |
| Cell Cycle                                    | polyploidy of bone marrow cell lines      | 2.59E-05 |
| Cell Death and Survival                       | apoptosis of T lymphocytes                | 2.66E-05 |
| Cellular Function and Maintenance             | function of lymphatic system cells        | 2.67E-05 |
| Hematological System Development and Function | cell movement of myeloid cells            | 2.80E-05 |
| Immune Cell Trafficking                       | cell movement of myeloid cells            | 2.80E-05 |
| Cellular Movement                             | cell movement of myeloid cells            | 2.80E-05 |
| Hematological System Development and Function | proliferation of T lymphocytes            | 3.12E-05 |
| Cellular Development                          | proliferation of T lymphocytes            | 3.12E-05 |
| Cellular Growth and Proliferation             | proliferation of T lymphocytes            | 3.12E-05 |
| Cellular Development                          | maturation of leukocytes                  | 3.37E-05 |
| Hematopoiesis                                 | maturation of leukocytes                  | 3.37E-05 |
| Infectious Disease                            | replication of RNA virus                  | 3.51E-05 |
| Infectious Disease                            | severe acute respiratory syndrome         | 3.56E-05 |
| Respiratory Disease                           | severe acute respiratory syndrome         | 3.56E-05 |
| Hematological System Development and Function | quantity of intraepithelial T lymphocytes | 3.58E-05 |
| Tissue Morphology                             | quantity of intraepithelial T lymphocytes | 3.58E-05 |
| Hematological System Development and Function | function of lymphocytes                   | 3.93E-05 |
| Cellular Function and Maintenance             | function of lymphocytes                   | 3.93E-05 |
| Cell Death and Survival                       | cytolysis                                 | 4.10E-05 |
| Cancer                                        | prostate cancer                           | 4.40E-05 |
| Reproductive System Disease                   | prostate cancer                           | 4.40E-05 |
| Hematological System Development and Function | proliferation of pre-B lymphocytes        | 5.67E-05 |
| Cellular Development                          | proliferation of pre-B lymphocytes        | 5.67E-05 |
| Hematopoiesis                                 | proliferation of pre-B lymphocytes        | 5.67E-05 |
| Cellular Growth and Proliferation             | proliferation of pre-B lymphocytes        | 5.67E-05 |
| Humoral Immune Response                       | proliferation of pre-B lymphocytes        | 5.67E-05 |
| Hematological System Development and Function | activation of lymphocytes                 | 7.01E-05 |
| Cell-To-Cell Signaling and Interaction        | activation of lymphocytes                 | 7.01E-05 |
| Immune Cell Trafficking                       | activation of lymphocytes                 | 7.01E-05 |
| Inflammatory Response                         | activation of lymphocytes                 | 7.01E-05 |
| Dermatological Diseases and Conditions        | plaque psoriasis                          | 7.16E-05 |
| Hematological System Development and Function | quantity of helper T lymphocytes          | 7.46E-05 |
| Tissue Morphology                             | quantity of helper T lymphocytes          | 7.46E-05 |
| Cell-To-Cell Signaling and Interaction        | antiviral response of fibroblasts         | 7.74E-05 |
| Inflammatory Response                         | antiviral response of fibroblasts         | 7.74E-05 |
| Antimicrobial Response                        | antiviral response of fibroblasts         | 7.74E-05 |
| Connective Tissue Development and Function    | antiviral response of fibroblasts         | 7.74E-05 |

|                                               |                                          |          |
|-----------------------------------------------|------------------------------------------|----------|
| Infectious Disease                            | infection by Newcastle disease virus     | 7.74E-05 |
| Cancer                                        | digestive organ tumor                    | 8.00E-05 |
| Gastrointestinal Disease                      | digestive organ tumor                    | 8.00E-05 |
| Hematological System Development and Function | chemotaxis of neutrophils                | 8.98E-05 |
| Immune Cell Trafficking                       | chemotaxis of neutrophils                | 8.98E-05 |
| Inflammatory Response                         | chemotaxis of neutrophils                | 8.98E-05 |
| Cellular Movement                             | chemotaxis of neutrophils                | 8.98E-05 |
| Cellular Movement                             | chemotaxis of cells                      | 9.29E-05 |
| Hematological System Development and Function | differentiation of T lymphocytes         | 9.37E-05 |
| Cellular Function and Maintenance             | differentiation of T lymphocytes         | 9.37E-05 |
| Cellular Development                          | differentiation of T lymphocytes         | 9.37E-05 |
| Hematopoiesis                                 | differentiation of T lymphocytes         | 9.37E-05 |
| Lymphoid Tissue Structure and Development     | differentiation of T lymphocytes         | 9.37E-05 |
| Cell-mediated Immune Response                 | differentiation of T lymphocytes         | 9.37E-05 |
| Immunological Disease                         | delayed hypersensitive reaction          | 9.83E-05 |
| Hematological System Development and Function | activation of phagocytes                 | 9.91E-05 |
| Cell-To-Cell Signaling and Interaction        | activation of phagocytes                 | 9.91E-05 |
| Immune Cell Trafficking                       | activation of phagocytes                 | 9.91E-05 |
| Inflammatory Response                         | activation of phagocytes                 | 9.91E-05 |
| Infectious Disease                            | infection of leukocytes                  | 9.94E-05 |
| Immunological Disease                         | infection of leukocytes                  | 9.94E-05 |
| Hematological Disease                         | infection of leukocytes                  | 9.94E-05 |
| Infectious Disease                            | replication of Influenza A virus         | 1.05E-04 |
| Inflammatory Disease                          | relapsing-remitting multiple sclerosis   | 1.06E-04 |
| Neurological Disease                          | relapsing-remitting multiple sclerosis   | 1.06E-04 |
| Skeletal and Muscular Disorders               | relapsing-remitting multiple sclerosis   | 1.06E-04 |
| Inflammatory Response                         | function of immune system                | 1.10E-04 |
| Neurological Disease                          | disorder of basal ganglia                | 1.11E-04 |
| Cancer                                        | colorectal cancer                        | 1.11E-04 |
| Gastrointestinal Disease                      | colorectal cancer                        | 1.11E-04 |
| Hematological System Development and Function | cell movement of phagocytes              | 1.13E-04 |
| Immune Cell Trafficking                       | cell movement of phagocytes              | 1.13E-04 |
| Inflammatory Response                         | cell movement of phagocytes              | 1.13E-04 |
| Cellular Movement                             | cell movement of phagocytes              | 1.13E-04 |
| Hematological System Development and Function | proliferation of B lymphocytes           | 1.14E-04 |
| Cellular Development                          | proliferation of B lymphocytes           | 1.14E-04 |
| Cellular Growth and Proliferation             | proliferation of B lymphocytes           | 1.14E-04 |
| Humoral Immune Response                       | proliferation of B lymphocytes           | 1.14E-04 |
| Inflammatory Disease                          | primary biliary cirrhosis                | 1.22E-04 |
| Gastrointestinal Disease                      | primary biliary cirrhosis                | 1.22E-04 |
| Hepatic System Disease                        | primary biliary cirrhosis                | 1.22E-04 |
| Liver Cirrhosis                               | primary biliary cirrhosis                | 1.22E-04 |
| Organismal Injury and Abnormalities           | primary biliary cirrhosis                | 1.22E-04 |
| Hematological System Development and Function | activation of T lymphocytes              | 1.28E-04 |
| Cell-To-Cell Signaling and Interaction        | activation of T lymphocytes              | 1.28E-04 |
| Immune Cell Trafficking                       | activation of T lymphocytes              | 1.28E-04 |
| Inflammatory Response                         | activation of T lymphocytes              | 1.28E-04 |
| Cell Death and Survival                       | cell viability of mononuclear leukocytes | 1.28E-04 |
| Inflammatory Disease                          | Pancreatitis                             | 1.28E-04 |
| Gastrointestinal Disease                      | Pancreatitis                             | 1.28E-04 |
| Endocrine System Disorders                    | Pancreatitis                             | 1.28E-04 |
| Inflammatory Response                         | inflammation of joint                    | 1.34E-04 |

|                                                       |                                                |          |
|-------------------------------------------------------|------------------------------------------------|----------|
| Cell Morphology                                       | abnormal morphology of B-1 lymphocytes         | 1.54E-04 |
| Humoral Immune Response                               | abnormal morphology of B-1 lymphocytes         | 1.54E-04 |
| Tissue Development                                    | angiogenesis of adductor muscle                | 1.54E-04 |
| Cardiovascular System Development and Function        | angiogenesis of adductor muscle                | 1.54E-04 |
| Embryonic Development                                 | angiogenesis of adductor muscle                | 1.54E-04 |
| Organ Development                                     | angiogenesis of adductor muscle                | 1.54E-04 |
| Organismal Development                                | angiogenesis of adductor muscle                | 1.54E-04 |
| Skeletal and Muscular System Development and Function | angiogenesis of adductor muscle                | 1.54E-04 |
| Gastrointestinal Disease                              | damage of crypt                                | 1.54E-04 |
| Inflammatory Response                                 | degranulation of granulocytes                  | 1.56E-04 |
| Cellular Compromise                                   | degranulation of granulocytes                  | 1.56E-04 |
| Hematological System Development and Function         | migration of mononuclear leukocytes            | 1.60E-04 |
| Immune Cell Trafficking                               | migration of mononuclear leukocytes            | 1.60E-04 |
| Cellular Movement                                     | migration of mononuclear leukocytes            | 1.60E-04 |
| Cell Death and Survival                               | apoptosis of antigen presenting cells          | 1.60E-04 |
| Cell Cycle                                            | mitogenesis of lymphocytes                     | 1.62E-04 |
| Hematological System Development and Function         | chemotaxis of myeloid cells                    | 1.84E-04 |
| Immune Cell Trafficking                               | chemotaxis of myeloid cells                    | 1.84E-04 |
| Inflammatory Response                                 | chemotaxis of myeloid cells                    | 1.84E-04 |
| Cellular Movement                                     | chemotaxis of myeloid cells                    | 1.84E-04 |
| Lymphoid Tissue Structure and Development             | abnormal morphology of marginal zone of spleen | 1.87E-04 |
| Organ Morphology                                      | abnormal morphology of marginal zone of spleen | 1.87E-04 |
| Hematological System Development and Function         | chemotaxis of phagocytes                       | 1.91E-04 |
| Immune Cell Trafficking                               | chemotaxis of phagocytes                       | 1.91E-04 |
| Inflammatory Response                                 | chemotaxis of phagocytes                       | 1.91E-04 |
| Cellular Movement                                     | chemotaxis of phagocytes                       | 1.91E-04 |
| Hematological System Development and Function         | inhibition of T lymphocytes                    | 1.94E-04 |
| Cellular Growth and Proliferation                     | inhibition of T lymphocytes                    | 1.94E-04 |
| Inflammatory Response                                 | innate immune response                         | 2.05E-04 |
| Hematological System Development and Function         | infiltration of leukocytes                     | 2.14E-04 |
| Immune Cell Trafficking                               | infiltration of leukocytes                     | 2.14E-04 |
| Cellular Movement                                     | infiltration of leukocytes                     | 2.14E-04 |
| Hematological System Development and Function         | quantity of antigen presenting cells           | 2.14E-04 |
| Tissue Morphology                                     | quantity of antigen presenting cells           | 2.14E-04 |
| Lymphoid Tissue Structure and Development             | development of lymphatic system component      | 2.21E-04 |
| Embryonic Development                                 | development of lymphatic system component      | 2.21E-04 |
| Organ Development                                     | development of lymphatic system component      | 2.21E-04 |
| Organismal Development                                | development of lymphatic system component      | 2.21E-04 |
| Renal and Urological Disease                          | diabetic nephropathy                           | 2.28E-04 |
| Cell-To-Cell Signaling and Interaction                | adhesion of blood cells                        | 2.30E-04 |
| Tissue Development                                    | adhesion of blood cells                        | 2.30E-04 |
| Hematological System Development and Function         | chemotaxis of leukocytes                       | 2.30E-04 |
| Immune Cell Trafficking                               | chemotaxis of leukocytes                       | 2.30E-04 |
| Inflammatory Response                                 | chemotaxis of leukocytes                       | 2.30E-04 |
| Cellular Movement                                     | chemotaxis of leukocytes                       | 2.30E-04 |
| Cell Death and Survival                               | cell viability of leukocytes                   | 2.33E-04 |
| Cellular Function and Maintenance                     | function of dendritic cells                    | 2.34E-04 |
| Hematological System Development and Function         | development of helper T lymphocytes            | 2.37E-04 |
| Cellular Function and Maintenance                     | development of helper T lymphocytes            | 2.37E-04 |
| Cellular Development                                  | development of helper T lymphocytes            | 2.37E-04 |
| Hematopoiesis                                         | development of helper T lymphocytes            | 2.37E-04 |
| Lymphoid Tissue Structure and Development             | development of helper T lymphocytes            | 2.37E-04 |

|                                                |                                                |          |
|------------------------------------------------|------------------------------------------------|----------|
| Cell-mediated Immune Response                  | development of helper T lymphocytes            | 2.37E-04 |
| Infectious Disease                             | infection of dendritic cells                   | 2.43E-04 |
| Immunological Disease                          | infection of dendritic cells                   | 2.43E-04 |
| Hematological Disease                          | infection of dendritic cells                   | 2.43E-04 |
| Cell-To-Cell Signaling and Interaction         | adhesion of epithelial cells                   | 2.45E-04 |
| Tissue Development                             | adhesion of epithelial cells                   | 2.45E-04 |
| Cell-To-Cell Signaling and Interaction         | adhesion of vascular endothelial cells         | 2.45E-04 |
| Tissue Development                             | adhesion of vascular endothelial cells         | 2.45E-04 |
| Cardiovascular System Development and Function | adhesion of vascular endothelial cells         | 2.45E-04 |
| Infectious Disease                             | infection of antigen presenting cells          | 2.53E-04 |
| Immunological Disease                          | infection of antigen presenting cells          | 2.53E-04 |
| Hematological Disease                          | infection of antigen presenting cells          | 2.53E-04 |
| Hematological System Development and Function  | Lymphocyte migration                           | 2.56E-04 |
| Immune Cell Trafficking                        | Lymphocyte migration                           | 2.56E-04 |
| Cellular Movement                              | Lymphocyte migration                           | 2.56E-04 |
| Infectious Disease                             | chronic mucocutaneous candidiasis              | 2.56E-04 |
| Dermatological Diseases and Conditions         | chronic mucocutaneous candidiasis              | 2.56E-04 |
| Hereditary Disorder                            | chronic mucocutaneous candidiasis              | 2.56E-04 |
| Cell Morphology                                | lack of follicular dendritic cells             | 2.56E-04 |
| Inflammatory Response                          | lack of follicular dendritic cells             | 2.56E-04 |
| Lymphoid Tissue Structure and Development      | lack of follicular dendritic cells             | 2.56E-04 |
| Tissue Morphology                              | lack of follicular dendritic cells             | 2.56E-04 |
| Organ Morphology                               | lack of follicular dendritic cells             | 2.56E-04 |
| Cell Morphology                                | morphology of nervous tissue cell lines        | 2.56E-04 |
| Protein Synthesis                              | quantity of IL-3 in blood                      | 2.56E-04 |
| Cell-To-Cell Signaling and Interaction         | responsiveness of T lymphocytes                | 2.56E-04 |
| Hematological System Development and Function  | survival of erythroblasts                      | 2.56E-04 |
| Cell Death and Survival                        | survival of erythroblasts                      | 2.56E-04 |
| Hematological System Development and Function  | survival of megakaryocytes                     | 2.56E-04 |
| Cell Death and Survival                        | survival of megakaryocytes                     | 2.56E-04 |
| Cell Death and Survival                        | apoptosis of phagocytes                        | 2.64E-04 |
| Hematological Disease                          | blood protein disorder                         | 2.65E-04 |
| Hematological System Development and Function  | quantity of hematopoietic progenitor cells     | 3.11E-04 |
| Hematopoiesis                                  | quantity of hematopoietic progenitor cells     | 3.11E-04 |
| Tissue Morphology                              | quantity of hematopoietic progenitor cells     | 3.11E-04 |
| Cell Death and Survival                        | apoptosis of hematopoietic progenitor cells    | 3.19E-04 |
| Cancer                                         | multiple myeloma                               | 3.50E-04 |
| Immunological Disease                          | multiple myeloma                               | 3.50E-04 |
| Hematological Disease                          | multiple myeloma                               | 3.50E-04 |
| Hematological System Development and Function  | function of myeloid cells                      | 3.68E-04 |
| Cellular Function and Maintenance              | function of myeloid cells                      | 3.68E-04 |
| Hematological System Development and Function  | adhesion of immune cells                       | 3.73E-04 |
| Cell-To-Cell Signaling and Interaction         | adhesion of immune cells                       | 3.73E-04 |
| Immune Cell Trafficking                        | adhesion of immune cells                       | 3.73E-04 |
| Tissue Development                             | adhesion of immune cells                       | 3.73E-04 |
| Hematological System Development and Function  | quantity of dendritic cells                    | 3.82E-04 |
| Inflammatory Response                          | quantity of dendritic cells                    | 3.82E-04 |
| Tissue Morphology                              | quantity of dendritic cells                    | 3.82E-04 |
| Hematological System Development and Function  | function of macrophages                        | 3.82E-04 |
| Cellular Function and Maintenance              | function of macrophages                        | 3.82E-04 |
| Skeletal and Muscular Disorders                | arthrogryposis, renal dysfunction, cholestasis | 3.83E-04 |
| Hereditary Disorder                            | arthrogryposis, renal dysfunction, cholestasis | 3.83E-04 |

|                                               |                                                 |          |
|-----------------------------------------------|-------------------------------------------------|----------|
| Hematological System Development and Function | quantity of B-1 lymphocytes                     | 3.87E-04 |
| Tissue Morphology                             | quantity of B-1 lymphocytes                     | 3.87E-04 |
| Humoral Immune Response                       | quantity of B-1 lymphocytes                     | 3.87E-04 |
| Cell Death and Survival                       | apoptosis of microglia                          | 3.88E-04 |
| Lymphoid Tissue Structure and Development     | development of lymphoid organ                   | 3.94E-04 |
| Tissue Development                            | development of lymphoid organ                   | 3.94E-04 |
| Embryonic Development                         | development of lymphoid organ                   | 3.94E-04 |
| Organ Development                             | development of lymphoid organ                   | 3.94E-04 |
| Organismal Development                        | development of lymphoid organ                   | 3.94E-04 |
| Lymphoid Tissue Structure and Development     | morphology of lymphoid organ                    | 4.08E-04 |
| Organ Morphology                              | morphology of lymphoid organ                    | 4.08E-04 |
| Hematological System Development and Function | cell movement of neutrophils                    | 4.15E-04 |
| Immune Cell Trafficking                       | cell movement of neutrophils                    | 4.15E-04 |
| Inflammatory Response                         | cell movement of neutrophils                    | 4.15E-04 |
| Cellular Movement                             | cell movement of neutrophils                    | 4.15E-04 |
| Cellular Growth and Proliferation             | formation of blood cells                        | 4.27E-04 |
| Cell-To-Cell Signaling and Interaction        | responsiveness of cells                         | 4.31E-04 |
| Infectious Disease                            | infection of phagocytes                         | 4.33E-04 |
| Immunological Disease                         | infection of phagocytes                         | 4.33E-04 |
| Hematological Disease                         | infection of phagocytes                         | 4.33E-04 |
| Humoral Immune Response                       | production of antibody                          | 4.34E-04 |
| Protein Synthesis                             | production of antibody                          | 4.34E-04 |
| Lymphoid Tissue Structure and Development     | morphology of lymphatic system component        | 4.51E-04 |
| Cell Death and Survival                       | cytotoxicity of leukocytes                      | 4.52E-04 |
| Cell Death and Survival                       | apoptosis of skin cancer cell lines             | 4.77E-04 |
| Cellular Function and Maintenance             | engulfment of cells                             | 4.81E-04 |
| Infectious Disease                            | replication of vesicular stomatitis virus       | 4.83E-04 |
| Cancer                                        | melanoma                                        | 4.95E-04 |
| Cell-To-Cell Signaling and Interaction        | response of mononuclear leukocytes              | 5.04E-04 |
| Cell Morphology                               | lack of T lymphocytes                           | 5.26E-04 |
| Hematological System Development and Function | lack of T lymphocytes                           | 5.26E-04 |
| Neurological Disease                          | autosomal dominant Parkinson disease            | 5.35E-04 |
| Skeletal and Muscular Disorders               | autosomal dominant Parkinson disease            | 5.35E-04 |
| Hereditary Disorder                           | autosomal dominant Parkinson disease            | 5.35E-04 |
| Cell-To-Cell Signaling and Interaction        | chemoattraction of fibroblasts                  | 5.35E-04 |
| Cellular Movement                             | chemoattraction of fibroblasts                  | 5.35E-04 |
| Connective Tissue Development and Function    | chemoattraction of fibroblasts                  | 5.35E-04 |
| Hematological System Development and Function | proliferation of hematopoietic progenitor cells | 5.38E-04 |
| Cellular Development                          | proliferation of hematopoietic progenitor cells | 5.38E-04 |
| Hematopoiesis                                 | proliferation of hematopoietic progenitor cells | 5.38E-04 |
| Cellular Growth and Proliferation             | proliferation of hematopoietic progenitor cells | 5.38E-04 |
| Hematological System Development and Function | activation of myeloid cells                     | 5.52E-04 |
| Cell-To-Cell Signaling and Interaction        | activation of myeloid cells                     | 5.52E-04 |
| Immune Cell Trafficking                       | activation of myeloid cells                     | 5.52E-04 |
| Inflammatory Response                         | activation of myeloid cells                     | 5.52E-04 |
| Cancer                                        | plasma cell dyscrasia                           | 5.93E-04 |
| Immunological Disease                         | plasma cell dyscrasia                           | 5.93E-04 |
| Hematological Disease                         | plasma cell dyscrasia                           | 5.93E-04 |
| Cell Death and Survival                       | cell death of neuroglia                         | 6.24E-04 |
| Cell Morphology                               | abnormal morphology of cytotoxic T cells        | 6.34E-04 |
| Hematological System Development and Function | abnormal morphology of cytotoxic T cells        | 6.34E-04 |
| Infectious Disease                            | infection of lung                               | 6.34E-04 |



|                                               |                                         |          |
|-----------------------------------------------|-----------------------------------------|----------|
| Respiratory Disease                           | infection of lung                       | 6.34E-04 |
| Infectious Disease                            | infection of cells                      | 6.44E-04 |
| Hematological System Development and Function | cell movement of granulocytes           | 6.50E-04 |
| Immune Cell Trafficking                       | cell movement of granulocytes           | 6.50E-04 |
| Cellular Movement                             | cell movement of granulocytes           | 6.50E-04 |
| Hematological System Development and Function | T cell migration                        | 6.51E-04 |
| Immune Cell Trafficking                       | T cell migration                        | 6.51E-04 |
| Cell-mediated Immune Response                 | T cell migration                        | 6.51E-04 |
| Cellular Movement                             | T cell migration                        | 6.51E-04 |
| Hematological System Development and Function | generation of lymphocytes               | 6.53E-04 |
| Cellular Growth and Proliferation             | generation of lymphocytes               | 6.53E-04 |
| Tissue Development                            | generation of lymphocytes               | 6.53E-04 |
| Hematological System Development and Function | differentiation of helper T lymphocytes | 6.56E-04 |
| Cellular Function and Maintenance             | differentiation of helper T lymphocytes | 6.56E-04 |
| Cellular Development                          | differentiation of helper T lymphocytes | 6.56E-04 |
| Hematopoiesis                                 | differentiation of helper T lymphocytes | 6.56E-04 |
| Lymphoid Tissue Structure and Development     | differentiation of helper T lymphocytes | 6.56E-04 |
| Cell-mediated Immune Response                 | differentiation of helper T lymphocytes | 6.56E-04 |
| Hematological System Development and Function | transmigration of leukocytes            | 6.75E-04 |
| Immune Cell Trafficking                       | transmigration of leukocytes            | 6.75E-04 |
| Cellular Movement                             | transmigration of leukocytes            | 6.75E-04 |
| Organismal Functions                          | recovery of mice                        | 6.93E-04 |
| Humoral Immune Response                       | quantity of IgG1                        | 6.98E-04 |
| Protein Synthesis                             | quantity of IgG1                        | 6.98E-04 |
| Lymphoid Tissue Structure and Development     | abnormal morphology of lymphoid organ   | 7.57E-04 |
| Organ Morphology                              | abnormal morphology of lymphoid organ   | 7.57E-04 |
| Cancer                                        | adenocarcinoma                          | 7.77E-04 |
| Cell Death and Survival                       | initiation of apoptosis                 | 8.21E-04 |
| Cell Cycle                                    | arrest in cell cycle progression        | 8.73E-04 |
| Gene Expression                               | transactivation                         | 8.88E-04 |
| Hematological System Development and Function | aggregation of phagocytes               | 8.90E-04 |
| Cell-To-Cell Signaling and Interaction        | aggregation of phagocytes               | 8.90E-04 |
| Immune Cell Trafficking                       | aggregation of phagocytes               | 8.90E-04 |
| Inflammatory Response                         | aggregation of phagocytes               | 8.90E-04 |
| Tissue Development                            | aggregation of phagocytes               | 8.90E-04 |
| Infectious Disease                            | replication of Picornaviridae           | 8.90E-04 |
| Hematological System Development and Function | quantity of B lymphocytes               | 8.95E-04 |
| Tissue Morphology                             | quantity of B lymphocytes               | 8.95E-04 |
| Humoral Immune Response                       | quantity of B lymphocytes               | 8.95E-04 |
| Cellular Function and Maintenance             | function of splenocytes                 | 9.10E-04 |
| Inflammatory Disease                          | proctitis                               | 9.10E-04 |
| Gastrointestinal Disease                      | proctitis                               | 9.10E-04 |
| Cell Death and Survival                       | delay in cell death                     | 9.12E-04 |
| Cancer                                        | Skin Cancer                             | 9.25E-04 |
| Dermatological Diseases and Conditions        | Skin Cancer                             | 9.25E-04 |
| Cell Morphology                               | abnormal morphology of cells            | 9.41E-04 |
| Hematological System Development and Function | infiltration by T lymphocytes           | 9.53E-04 |
| Immune Cell Trafficking                       | infiltration by T lymphocytes           | 9.53E-04 |
| Cell-mediated Immune Response                 | infiltration by T lymphocytes           | 9.53E-04 |
| Cellular Movement                             | infiltration by T lymphocytes           | 9.53E-04 |
| Inflammatory Response                         | antigen presentation                    | 9.96E-04 |
| Antigen Presentation                          | antigen presentation                    | 9.96E-04 |

|                                               |                                                       |          |
|-----------------------------------------------|-------------------------------------------------------|----------|
| Humoral Immune Response                       | class switching                                       | 1.13E-03 |
| Lymphoid Tissue Structure and Development     | abnormal morphology of periarteriolar lymphoid sheath | 1.13E-03 |
| Organ Morphology                              | abnormal morphology of periarteriolar lymphoid sheath | 1.13E-03 |
| Cell Death and Survival                       | cell death of oligodendrocyte precursor cells         | 1.13E-03 |
| Cell Death and Survival                       | cell death of peripheral T lymphocyte                 | 1.13E-03 |
| Lymphoid Tissue Structure and Development     | quantity of lymphatic system cells                    | 1.15E-03 |
| Tissue Morphology                             | quantity of lymphatic system cells                    | 1.15E-03 |
| Immunological Disease                         | immunodeficiency                                      | 1.18E-03 |
| Cell-To-Cell Signaling and Interaction        | phagocytosis of cells                                 | 1.19E-03 |
| Cellular Function and Maintenance             | phagocytosis of cells                                 | 1.19E-03 |
| Inflammatory Response                         | phagocytosis of cells                                 | 1.19E-03 |
| Inflammatory Response                         | cell-mediated response                                | 1.19E-03 |
| Protein Synthesis                             | quantity of IFNG in blood                             | 1.20E-03 |
| Immunological Disease                         | lymphoproliferative disorder                          | 1.21E-03 |
| Hematological System Development and Function | differentiation of Th1 cells                          | 1.23E-03 |
| Cellular Function and Maintenance             | differentiation of Th1 cells                          | 1.23E-03 |
| Cellular Development                          | differentiation of Th1 cells                          | 1.23E-03 |
| Hematopoiesis                                 | differentiation of Th1 cells                          | 1.23E-03 |
| Lymphoid Tissue Structure and Development     | differentiation of Th1 cells                          | 1.23E-03 |
| Cell-mediated Immune Response                 | differentiation of Th1 cells                          | 1.23E-03 |
| Immunological Disease                         | polyarticular juvenile rheumatoid arthritis           | 1.28E-03 |
| Inflammatory Disease                          | polyarticular juvenile rheumatoid arthritis           | 1.28E-03 |
| Connective Tissue Disorders                   | polyarticular juvenile rheumatoid arthritis           | 1.28E-03 |
| Skeletal and Muscular Disorders               | polyarticular juvenile rheumatoid arthritis           | 1.28E-03 |
| Inflammatory Response                         | antiviral response of cells                           | 1.29E-03 |
| Antimicrobial Response                        | antiviral response of cells                           | 1.29E-03 |
| Cancer                                        | malignant cutaneous melanoma cancer                   | 1.37E-03 |
| Dermatological Diseases and Conditions        | malignant cutaneous melanoma cancer                   | 1.37E-03 |
| Tissue Development                            | morphology of photoreceptor layer                     | 1.38E-03 |
| Embryonic Development                         | morphology of photoreceptor layer                     | 1.38E-03 |
| Organ Development                             | morphology of photoreceptor layer                     | 1.38E-03 |
| Organismal Development                        | morphology of photoreceptor layer                     | 1.38E-03 |
| Organ Morphology                              | morphology of photoreceptor layer                     | 1.38E-03 |
| Visual System Development and Function        | morphology of photoreceptor layer                     | 1.38E-03 |
| Cell-To-Cell Signaling and Interaction        | targeting of cells                                    | 1.38E-03 |
| Hematological System Development and Function | cell movement of microglia                            | 1.38E-03 |
| Immune Cell Trafficking                       | cell movement of microglia                            | 1.38E-03 |
| Inflammatory Response                         | cell movement of microglia                            | 1.38E-03 |
| Cellular Movement                             | cell movement of microglia                            | 1.38E-03 |
| Cancer                                        | precursor T-cell lymphoblastic leukemia-lymphoma      | 1.38E-03 |
| Immunological Disease                         | precursor T-cell lymphoblastic leukemia-lymphoma      | 1.38E-03 |
| Hematological Disease                         | precursor T-cell lymphoblastic leukemia-lymphoma      | 1.38E-03 |
| Lymphoid Tissue Structure and Development     | development of lymph node                             | 1.39E-03 |
| Tissue Development                            | development of lymph node                             | 1.39E-03 |
| Embryonic Development                         | development of lymph node                             | 1.39E-03 |
| Organ Development                             | development of lymph node                             | 1.39E-03 |
| Organismal Development                        | development of lymph node                             | 1.39E-03 |
| Hematological System Development and Function | transmigration of phagocytes                          | 1.39E-03 |
| Immune Cell Trafficking                       | transmigration of phagocytes                          | 1.39E-03 |
| Inflammatory Response                         | transmigration of phagocytes                          | 1.39E-03 |
| Cellular Movement                             | transmigration of phagocytes                          | 1.39E-03 |
| Cell Death and Survival                       | antiapoptosis                                         | 1.42E-03 |

|                                               |                                               |          |
|-----------------------------------------------|-----------------------------------------------|----------|
| Humoral Immune Response                       | quantity of immunoglobulin                    | 1.42E-03 |
| Protein Synthesis                             | quantity of immunoglobulin                    | 1.42E-03 |
| Gastrointestinal Disease                      | experimentally-induced diabetes               | 1.50E-03 |
| Endocrine System Disorders                    | experimentally-induced diabetes               | 1.50E-03 |
| Metabolic Disease                             | experimentally-induced diabetes               | 1.50E-03 |
| Hematological System Development and Function | quantity of phagocytes                        | 1.55E-03 |
| Inflammatory Response                         | quantity of phagocytes                        | 1.55E-03 |
| Tissue Morphology                             | quantity of phagocytes                        | 1.55E-03 |
| Cell Death and Survival                       | killing of lymphocytes                        | 1.58E-03 |
| Cell-To-Cell Signaling and Interaction        | activation of neuroglia                       | 1.60E-03 |
| Nervous System Development and Function       | activation of neuroglia                       | 1.60E-03 |
| Hematological System Development and Function | mitogenesis of T lymphocytes                  | 1.65E-03 |
| Cell Cycle                                    | mitogenesis of T lymphocytes                  | 1.65E-03 |
| Inflammatory Disease                          | swelling of knee joint                        | 1.65E-03 |
| Inflammatory Response                         | swelling of knee joint                        | 1.65E-03 |
| Skeletal and Muscular Disorders               | swelling of knee joint                        | 1.65E-03 |
| Lymphoid Tissue Structure and Development     | abnormal morphology of B-cell follicle        | 1.68E-03 |
| Lymphoid Tissue Structure and Development     | abnormal morphology of Peyer's patches        | 1.68E-03 |
| Tissue Morphology                             | abnormal morphology of Peyer's patches        | 1.68E-03 |
| Organ Morphology                              | abnormal morphology of Peyer's patches        | 1.68E-03 |
| Digestive System Development and Function     | abnormal morphology of Peyer's patches        | 1.68E-03 |
| Free Radical Scavenging                       | release of superoxide                         | 1.68E-03 |
| Molecular Transport                           | release of superoxide                         | 1.68E-03 |
| Organismal Injury and Abnormalities           | cytosis                                       | 1.72E-03 |
| Hematological System Development and Function | quantity of thymocytes                        | 1.75E-03 |
| Hematopoiesis                                 | quantity of thymocytes                        | 1.75E-03 |
| Tissue Morphology                             | quantity of thymocytes                        | 1.75E-03 |
| Hematological System Development and Function | quantity of plasma cells                      | 1.90E-03 |
| Tissue Morphology                             | quantity of plasma cells                      | 1.90E-03 |
| Humoral Immune Response                       | quantity of plasma cells                      | 1.90E-03 |
| Humoral Immune Response                       | quantity of IgG2a                             | 1.94E-03 |
| Protein Synthesis                             | quantity of IgG2a                             | 1.94E-03 |
| Infectious Disease                            | infection by DNA virus                        | 1.97E-03 |
| Immunological Disease                         | hypoplasia of thymus gland                    | 2.01E-03 |
| Developmental Disorder                        | hypoplasia of thymus gland                    | 2.01E-03 |
| Embryonic Development                         | development of face                           | 2.02E-03 |
| Organismal Development                        | development of face                           | 2.02E-03 |
| Hematological System Development and Function | migration of leukocyte cell lines             | 2.02E-03 |
| Immune Cell Trafficking                       | migration of leukocyte cell lines             | 2.02E-03 |
| Cellular Movement                             | migration of leukocyte cell lines             | 2.02E-03 |
| Hematological System Development and Function | development of hematopoietic progenitor cells | 2.02E-03 |
| Cellular Development                          | development of hematopoietic progenitor cells | 2.02E-03 |
| Hematopoiesis                                 | development of hematopoietic progenitor cells | 2.02E-03 |
| Hematological System Development and Function | cell movement of macrophages                  | 2.03E-03 |
| Immune Cell Trafficking                       | cell movement of macrophages                  | 2.03E-03 |
| Inflammatory Response                         | cell movement of macrophages                  | 2.03E-03 |
| Cellular Movement                             | cell movement of macrophages                  | 2.03E-03 |
| Cell Death and Survival                       | apoptosis of thymocytes                       | 2.07E-03 |
| Immunological Disease                         | eosinophilia                                  | 2.12E-03 |
| Hematological Disease                         | eosinophilia                                  | 2.12E-03 |
| Cell Death and Survival                       | cytotoxicity of lymphocytes                   | 2.18E-03 |
| Hematological System Development and Function | development of B lymphocytes                  | 2.23E-03 |

|                                               |                                                      |          |
|-----------------------------------------------|------------------------------------------------------|----------|
| Cellular Development                          | development of B lymphocytes                         | 2.23E-03 |
| Hematopoiesis                                 | development of B lymphocytes                         | 2.23E-03 |
| Lymphoid Tissue Structure and Development     | development of B lymphocytes                         | 2.23E-03 |
| Humoral Immune Response                       | development of B lymphocytes                         | 2.23E-03 |
| Hematological System Development and Function | infiltration by mononuclear leukocytes               | 2.23E-03 |
| Immune Cell Trafficking                       | infiltration by mononuclear leukocytes               | 2.23E-03 |
| Cellular Movement                             | infiltration by mononuclear leukocytes               | 2.23E-03 |
| Cell Morphology                               | abnormal morphology of intraepithelial T lymphocytes | 2.26E-03 |
| Hematological System Development and Function | abnormal morphology of intraepithelial T lymphocytes | 2.26E-03 |
| Hematological System Development and Function | differentiation of gamma-delta T lymphocytes         | 2.26E-03 |
| Cellular Function and Maintenance             | differentiation of gamma-delta T lymphocytes         | 2.26E-03 |
| Cellular Development                          | differentiation of gamma-delta T lymphocytes         | 2.26E-03 |
| Hematopoiesis                                 | differentiation of gamma-delta T lymphocytes         | 2.26E-03 |
| Lymphoid Tissue Structure and Development     | differentiation of gamma-delta T lymphocytes         | 2.26E-03 |
| Cell-mediated Immune Response                 | differentiation of gamma-delta T lymphocytes         | 2.26E-03 |
| Cellular Function and Maintenance             | exocytosis of Weibel-Palade bodies                   | 2.26E-03 |
| Molecular Transport                           | exocytosis of Weibel-Palade bodies                   | 2.26E-03 |
| Cellular Assembly and Organization            | exocytosis of Weibel-Palade bodies                   | 2.26E-03 |
| Infectious Disease                            | replication of encephalomyocarditis virus            | 2.26E-03 |
| Cell Death and Survival                       | apoptosis of neuroglia                               | 2.31E-03 |
| Infectious Disease                            | endotoxemia                                          | 2.31E-03 |
| Infectious Disease                            | flu                                                  | 2.31E-03 |
| Immunological Disease                         | Sjogren's syndrome                                   | 2.38E-03 |
| Gastrointestinal Disease                      | Sjogren's syndrome                                   | 2.38E-03 |
| Ophthalmic Disease                            | Sjogren's syndrome                                   | 2.38E-03 |
| Cancer                                        | infection of tumor cell lines                        | 2.44E-03 |
| Infectious Disease                            | infection of tumor cell lines                        | 2.44E-03 |
| Cell Death and Survival                       | cell death of dendritic cells                        | 2.46E-03 |
| Hematological System Development and Function | quantity of double-positive thymocyte                | 2.46E-03 |
| Hematopoiesis                                 | quantity of double-positive thymocyte                | 2.46E-03 |
| Tissue Morphology                             | quantity of double-positive thymocyte                | 2.46E-03 |
| Neurological Disease                          | Huntington's disease                                 | 2.49E-03 |
| Skeletal and Muscular Disorders               | Huntington's disease                                 | 2.49E-03 |
| Hereditary Disorder                           | Huntington's disease                                 | 2.49E-03 |
| Hematological System Development and Function | generation of T lymphocytes                          | 2.55E-03 |
| Cellular Growth and Proliferation             | generation of T lymphocytes                          | 2.55E-03 |
| Tissue Development                            | generation of T lymphocytes                          | 2.55E-03 |
| Neurological Disease                          | neurological signs                                   | 2.57E-03 |
| Inflammatory Response                         | degranulation of cells                               | 2.57E-03 |
| Cellular Compromise                           | degranulation of cells                               | 2.57E-03 |
| Hematological System Development and Function | aggregation of dendritic cells                       | 2.60E-03 |
| Cell-To-Cell Signaling and Interaction        | aggregation of dendritic cells                       | 2.60E-03 |
| Immune Cell Trafficking                       | aggregation of dendritic cells                       | 2.60E-03 |
| Inflammatory Response                         | aggregation of dendritic cells                       | 2.60E-03 |
| Tissue Development                            | aggregation of dendritic cells                       | 2.60E-03 |
| Lymphoid Tissue Structure and Development     | lack of Peyer's patches                              | 2.60E-03 |
| Tissue Morphology                             | lack of Peyer's patches                              | 2.60E-03 |
| Organ Morphology                              | lack of Peyer's patches                              | 2.60E-03 |
| Digestive System Development and Function     | lack of Peyer's patches                              | 2.60E-03 |
| Inflammatory Response                         | antibody response                                    | 2.63E-03 |
| Cancer                                        | skin cancer                                          | 2.67E-03 |
| Dermatological Diseases and Conditions        | skin cancer                                          | 2.67E-03 |

|                                                      |                                       |          |
|------------------------------------------------------|---------------------------------------|----------|
| Hematological System Development and Function        | cell movement of leukocyte cell lines | 2.72E-03 |
| Immune Cell Trafficking                              | cell movement of leukocyte cell lines | 2.72E-03 |
| Cellular Movement                                    | cell movement of leukocyte cell lines | 2.72E-03 |
| Cell Death and Survival                              | apoptosis of tumor cell lines         | 2.83E-03 |
| Hematological System Development and Function        | activation of neutrophils             | 2.89E-03 |
| Cell-To-Cell Signaling and Interaction               | activation of neutrophils             | 2.89E-03 |
| Immune Cell Trafficking                              | activation of neutrophils             | 2.89E-03 |
| Inflammatory Response                                | activation of neutrophils             | 2.89E-03 |
| Cellular Function and Maintenance                    | ion homeostasis of cells              | 2.90E-03 |
| Cellular Development                                 | maturation of dendritic cells         | 2.95E-03 |
| Hematopoiesis                                        | maturation of dendritic cells         | 2.95E-03 |
| Hematological System Development and Function        | quantity of B-2 lymphocytes           | 2.96E-03 |
| Tissue Morphology                                    | quantity of B-2 lymphocytes           | 2.96E-03 |
| Humoral Immune Response                              | quantity of B-2 lymphocytes           | 2.96E-03 |
| Infectious Disease                                   | replication of Murine herpesvirus 4   | 2.96E-03 |
| Cell-To-Cell Signaling and Interaction               | immune response of T lymphocytes      | 3.08E-03 |
| Inflammatory Response                                | immune response of T lymphocytes      | 3.08E-03 |
| Cell Death and Survival                              | cell death of tumor cell lines        | 3.09E-03 |
| Neurological Disease                                 | movement disorder                     | 3.09E-03 |
| Respiratory Disease                                  | edema of lung                         | 3.11E-03 |
| Organismal Injury and Abnormalities                  | edema of lung                         | 3.11E-03 |
| Immunological Disease                                | allergy                               | 3.14E-03 |
| Cell Death and Survival                              | apoptosis of pancreatic cancer cells  | 3.35E-03 |
| Tumor Morphology                                     | apoptosis of pancreatic cancer cells  | 3.35E-03 |
| Hematological System Development and Function        | chemoattraction of neutrophils        | 3.35E-03 |
| Cell-To-Cell Signaling and Interaction               | chemoattraction of neutrophils        | 3.35E-03 |
| Immune Cell Trafficking                              | chemoattraction of neutrophils        | 3.35E-03 |
| Inflammatory Response                                | chemoattraction of neutrophils        | 3.35E-03 |
| Cellular Movement                                    | chemoattraction of neutrophils        | 3.35E-03 |
| Neurological Disease                                 | damage of axons                       | 3.35E-03 |
| Hereditary Disorder                                  | familial atrial fibrillation type 9   | 5.11E-03 |
| Cardiac Arrhythmia                                   | familial atrial fibrillation type 9   | 5.11E-03 |
| Cardiovascular Disease                               | familial atrial fibrillation type 9   | 5.11E-03 |
| Renal and Urological Disease                         | septic acute kidney injury            | 5.11E-03 |
| Kidney Failure                                       | septic acute kidney injury            | 5.11E-03 |
| Inflammatory Disease                                 | Nephritis                             | 7.87E-03 |
| Inflammatory Response                                | Nephritis                             | 7.87E-03 |
| Renal and Urological Disease                         | Nephritis                             | 7.87E-03 |
| Renal Inflammation                                   | Nephritis                             | 7.87E-03 |
| Renal Nephritis                                      | Nephritis                             | 7.87E-03 |
| Inflammatory Disease                                 | Hepatitis                             | 8.43E-03 |
| Gastrointestinal Disease                             | Hepatitis                             | 8.43E-03 |
| Hepatic System Disease                               | Hepatitis                             | 8.43E-03 |
| Liver Hepatitis                                      | Hepatitis                             | 8.43E-03 |
| Cellular Movement                                    | infiltration of kidney                | 1.02E-02 |
| Renal Cellular Infiltration                          | infiltration of kidney                | 1.02E-02 |
| Renal and Urological System Development and Function | infiltration of kidney                | 1.02E-02 |
| Renal and Urological Disease                         | ischemic injury of kidney             | 1.02E-02 |
| Organismal Injury and Abnormalities                  | ischemic injury of kidney             | 1.02E-02 |
| Cardiovascular Disease                               | ischemic injury of kidney             | 1.02E-02 |
| Renal Damage                                         | ischemic injury of kidney             | 1.02E-02 |
| Cell Death and Survival                              | cell death of renal tubule            | 1.23E-02 |

|                                                      |                                                 |          |
|------------------------------------------------------|-------------------------------------------------|----------|
| Renal Necrosis/Cell Death                            | cell death of renal tubule                      | 1.23E-02 |
| Inflammatory Disease                                 | alcoholic hepatitis                             | 1.31E-02 |
| Gastrointestinal Disease                             | alcoholic hepatitis                             | 1.31E-02 |
| Hepatic System Disease                               | alcoholic hepatitis                             | 1.31E-02 |
| Liver Hepatitis                                      | alcoholic hepatitis                             | 1.31E-02 |
| Hereditary Disorder                                  | short QT syndrome                               | 1.53E-02 |
| Cardiac Arrhythmia                                   | short QT syndrome                               | 1.53E-02 |
| Cardiovascular Disease                               | short QT syndrome                               | 1.53E-02 |
| Cell Death and Survival                              | cell death of cardiomyocytes                    | 1.67E-02 |
| Cardiac Necrosis/Cell Death                          | cell death of cardiomyocytes                    | 1.67E-02 |
| Infectious Disease                                   | chronic hepatitis B                             | 2.22E-02 |
| Inflammatory Disease                                 | chronic hepatitis B                             | 2.22E-02 |
| Gastrointestinal Disease                             | chronic hepatitis B                             | 2.22E-02 |
| Hepatic System Disease                               | chronic hepatitis B                             | 2.22E-02 |
| Liver Hepatitis                                      | chronic hepatitis B                             | 2.22E-02 |
| Cancer                                               | transformation of endocardial cells             | 2.53E-02 |
| Cardiac Transformation                               | transformation of endocardial cells             | 2.53E-02 |
| Organismal Injury and Abnormalities                  | bleeding of heart                               | 3.03E-02 |
| Cardiovascular Disease                               | bleeding of heart                               | 3.03E-02 |
| Cardiac Hemorrhaging                                 | bleeding of heart                               | 3.03E-02 |
| Inflammatory Disease                                 | nephrotoxic nephritis                           | 3.03E-02 |
| Inflammatory Response                                | nephrotoxic nephritis                           | 3.03E-02 |
| Renal and Urological Disease                         | nephrotoxic nephritis                           | 3.03E-02 |
| Renal Inflammation                                   | nephrotoxic nephritis                           | 3.03E-02 |
| Renal Nephritis                                      | nephrotoxic nephritis                           | 3.03E-02 |
| Cellular Development                                 | proliferation of renal tubular epithelial cells | 3.52E-02 |
| Cellular Growth and Proliferation                    | proliferation of renal tubular epithelial cells | 3.52E-02 |
| Renal and Urological System Development and Function | proliferation of renal tubular epithelial cells | 3.52E-02 |
| Renal Proliferation                                  | proliferation of renal tubular epithelial cells | 3.52E-02 |
| Inflammatory Disease                                 | tubular nephritis                               | 3.52E-02 |
| Inflammatory Response                                | tubular nephritis                               | 3.52E-02 |
| Renal and Urological Disease                         | tubular nephritis                               | 3.52E-02 |
| Renal Inflammation                                   | tubular nephritis                               | 3.52E-02 |
| Renal Nephritis                                      | tubular nephritis                               | 3.52E-02 |
| Cell Death and Survival                              | apoptosis of cardiomyocytes                     | 3.71E-02 |
| Cardiac Necrosis/Cell Death                          | apoptosis of cardiomyocytes                     | 3.71E-02 |
| Renal and Urological Disease                         | failure of kidney                               | 3.90E-02 |
| Organismal Injury and Abnormalities                  | failure of kidney                               | 3.90E-02 |
| Kidney Failure                                       | failure of kidney                               | 3.90E-02 |
| Cancer                                               | tumorigenesis of hepatocellular carcinoma       | 4.01E-02 |
| Gastrointestinal Disease                             | tumorigenesis of hepatocellular carcinoma       | 4.01E-02 |
| Hepatic System Disease                               | tumorigenesis of hepatocellular carcinoma       | 4.01E-02 |
| Hepatocellular Carcinoma                             | tumorigenesis of hepatocellular carcinoma       | 4.01E-02 |
| Liver Hyperplasia/Hyperproliferation                 | tumorigenesis of hepatocellular carcinoma       | 4.01E-02 |
| Inflammatory Disease                                 | chronic hepatitis                               | 4.60E-02 |
| Gastrointestinal Disease                             | chronic hepatitis                               | 4.60E-02 |
| Hepatic System Disease                               | chronic hepatitis                               | 4.60E-02 |
| Liver Hepatitis                                      | chronic hepatitis                               | 4.60E-02 |
| Cellular Development                                 | proliferation of hepatic stellate cells         | 4.99E-02 |
| Cellular Growth and Proliferation                    | proliferation of hepatic stellate cells         | 4.99E-02 |
| Connective Tissue Development and Function           | proliferation of hepatic stellate cells         | 4.99E-02 |
| Hepatic System Development and Function              | proliferation of hepatic stellate cells         | 4.99E-02 |

|                              |                                         |          |
|------------------------------|-----------------------------------------|----------|
| Liver Fibrosis               | proliferation of hepatic stellate cells | 4.99E-02 |
| Liver Proliferation          | proliferation of hepatic stellate cells | 4.99E-02 |
| Renal and Urological Disease | ischemic acute renal failure            | 4.99E-02 |
| Kidney Failure               | ischemic acute renal failure            | 4.99E-02 |

both group of septic shock patients.

| Molecules                                                                                                        | Molecules |
|------------------------------------------------------------------------------------------------------------------|-----------|
| ANKRD9,AQP3,BAG1,BCL11B,C14orf159,CA2,CARD16,CASP1,CD274,CD52,CFI                                                | 66        |
| AGTRAP,ALOX12,ANKRD9,CA2,CAMK1D,CARD16,CD274,CD46,CX3CR1,DDX58                                                   | 44        |
| CASP1,CD274,CFD,CLEC7A,CX3CR1,DDX58,F2RL1,GZMA,HLA-DQB1,IGHM,IRF1                                                | 19        |
| BCL11B,CD274,CD46,HLA-DQA1,HLA-DQB1,IGHM,IL7R,IRF1 (includes EG:1636)                                            | 11        |
| BCL11B,CD274,CD46,HLA-DQA1,HLA-DQB1,IGHM,IL7R,IRF1 (includes EG:1636)                                            | 11        |
| BCL11B,CD274,CD46,HLA-DQA1,HLA-DQB1,IGHM,IL7R,IRF1 (includes EG:1636)                                            | 13        |
| APOL6,AQP3,CFD,CLEC7A,DDX58,EPSTI1,FAM26F,FCGR3B,GBP1,GBP2 (includes EG:1636)                                    | 22        |
| BCL11B,CASP1,CD274,CD46,CLEC7A,CX3CR1,F2RL1,GZMA,HLA-DQA1,HLA-DQB1,IGHM,IRF1 (includes EG:1636)                  | 25        |
| BCL11B,CASP1,CD274,CD46,CLEC7A,CX3CR1,F2RL1,GZMA,HLA-DQA1,HLA-DQB1,IGHM,IRF1 (includes EG:1636)                  | 25        |
| BTN3A1,BTN3A2,BTN3A3,CASP1,CD274,CLEC2B,F2RL1,GALNT2,GBP2 (includes EG:1636)                                     | 27        |
| BAG1,BCL11B,CASP1,CD274,FGL2,GIMAP4,GZMA,HSP90AB1,IGHM,IL7R,IRF1                                                 | 24        |
| CASP1,CD274,CX3CR1,F2RL1,HLA-DQA1,HLA-DQB1,IGHM,IRF1 (includes EG:1636)                                          | 13        |
| CASP1,CD274,CX3CR1,F2RL1,HLA-DQA1,HLA-DQB1,IGHM,IRF1 (includes EG:1636)                                          | 13        |
| CASP1,CD274,CX3CR1,F2RL1,HLA-DQA1,HLA-DQB1,IGHM,IRF1 (includes EG:1636)                                          | 13        |
| ANKRD9,AQP3,BAG1,CA2,CARD16,CASP1,CD274,CFD,EPB42,F2RL1,FGL2,GBL1                                                | 47        |
| AK1,APOL6,AQP3,BCL11B,CA2,CASP1,CD274,CLEC7A,F2RL1,FCGR3B,GIMAP4                                                 | 34        |
| BCL11B,CD274,CD46,DDX58,HLA-DQA1,HLA-DQB1,IGHM,IL7R,IRF1 (includes EG:1636)                                      | 15        |
| ANKRD9,AQP3,BAG1,CA2,CARD16,CASP1,CD274,CFD,EPB42,F2RL1,FGL2,GBL1                                                | 45        |
| BCL11B,CD274,HLA-DQA1,HLA-DQB1,IGHM,IRF1 (includes EG:1636),LCK,LY75                                             | 9         |
| BCL11B,CD274,HLA-DQA1,HLA-DQB1,IGHM,IRF1 (includes EG:1636),LCK,LY75                                             | 9         |
| BCL11B,CD274,CD46,CLEC7A,F2RL1,GZMA,HLA-DQA1,HLA-DQB1,IGHM,IRF1 (includes EG:1636)                               | 22        |
| BCL11B,CD274,CD46,CLEC7A,F2RL1,GZMA,HLA-DQA1,HLA-DQB1,IGHM,IRF1 (includes EG:1636)                               | 22        |
| BCL11B,CD274,CD46,CLEC7A,F2RL1,GZMA,HLA-DQA1,HLA-DQB1,IGHM,IRF1 (includes EG:1636)                               | 22        |
| BCL11B,CD274,CD46,CLEC7A,F2RL1,GZMA,HLA-DQA1,HLA-DQB1,IGHM,IRF1 (includes EG:1636)                               | 22        |
| CD274,CLEC2B,F2RL1,GALNT2,GBP2 (includes EG:14468),GZMA,HLA-DPB1,HLA-DQA1,HLA-DQB1,IGHM,IRF1 (includes EG:14468) | 22        |
| CD274,CLEC2B,F2RL1,GALNT2,GBP2 (includes EG:14468),GZMA,HLA-DPB1,HLA-DQA1,HLA-DQB1,IGHM,IRF1 (includes EG:14468) | 22        |
| CD274,CLEC2B,F2RL1,GALNT2,GBP2 (includes EG:14468),GZMA,HLA-DPB1,HLA-DQA1,HLA-DQB1,IGHM,IRF1 (includes EG:14468) | 22        |
| ALOX12,ANKRD9,AQP3,BAG1,CA2,CARD16,CASP1,CD274,CFD,EPB42,F2RL1,FGL2,GBL1                                         | 46        |
| BCL11B,CD274,DDX58,HLA-DQA1,HLA-DQB1,IGHM,IRF1 (includes EG:1636),LCK,LY75                                       | 12        |
| BCL11B,CD274,CD46,DDX58,EPB42,HLA-DQA1,HLA-DQB1,IGHM,IL7R,IRF1 (includes EG:1636)                                | 16        |
| CASP1,CD274,CLEC2B,F2RL1,GALNT2,GBP2 (includes EG:14468),GZMA,HLA-DQA1,HLA-DQB1,IGHM,IRF1 (includes EG:14468)    | 26        |
| CASP1,CD274,CLEC2B,F2RL1,GALNT2,GBP2 (includes EG:14468),GZMA,HLA-DQA1,HLA-DQB1,IGHM,IRF1 (includes EG:14468)    | 26        |
| CASP1,CD274,CLEC2B,F2RL1,GALNT2,GBP2 (includes EG:14468),GZMA,HLA-DQA1,HLA-DQB1,IGHM,IRF1 (includes EG:14468)    | 26        |
| CASP1,CD274,CLEC7A,CX3CR1,DDX58,GIMAP4,GZMA,HLA-DQB1,IGHM,IRF1 (includes EG:1636)                                | 18        |
| BCL11B,CASP1,CD274,CD46,CLEC7A,CX3CR1,F2RL1,GZMA,HLA-DQA1,HLA-DQB1,IGHM,IRF1 (includes EG:1636)                  | 27        |
| ALOX12,BCL11B,CASP1,CD274,DDX58,F2RL1,HLA-DQA1,IGHM,ITGA4,LTB,MM                                                 | 15        |
| ALOX12,BCL11B,CASP1,CD274,DDX58,F2RL1,HLA-DQA1,IGHM,ITGA4,LTB,MM                                                 | 15        |
| AK1,BCL11B,BTN3A1,CA2,CASP1,CD52,EPSTI1,F2RL1,GBP1,HLA-DQA1,HLA-DQB1,IGHM,IRF1 (includes EG:1636)                | 24        |
| AK1,BCL11B,BTN3A1,CA2,CASP1,CD52,EPSTI1,F2RL1,GBP1,HLA-DQA1,HLA-DQB1,IGHM,IRF1 (includes EG:1636)                | 24        |
| BCL11B,CD274,HLA-DQA1,HLA-DQB1,IGHM,IRF1 (includes EG:1636),LCK,LY75                                             | 10        |
| CASP1,CD274,CLEC2B,F2RL1,GALNT2,GBP2 (includes EG:14468),GZMA,HLA-DQA1,HLA-DQB1,IGHM,IRF1 (includes EG:14468)    | 27        |
| CASP1,CD274,CLEC2B,F2RL1,GALNT2,GBP2 (includes EG:14468),GZMA,HLA-DQA1,HLA-DQB1,IGHM,IRF1 (includes EG:14468)    | 27        |
| CASP1,CD274,CLEC2B,F2RL1,GALNT2,GBP2 (includes EG:14468),GZMA,HLA-DQA1,HLA-DQB1,IGHM,IRF1 (includes EG:14468)    | 27        |
| BCL11B,CASP1,CD274,GIMAP4,HLA-DQA1,HLA-DQB1,IGHM,IL7R,IRF1 (includes EG:1636)                                    | 19        |
| BCL11B,CASP1,CD274,GIMAP4,HLA-DQA1,HLA-DQB1,IGHM,IL7R,IRF1 (includes EG:1636)                                    | 19        |
| BCL11B,CASP1,CD274,GIMAP4,HLA-DQA1,HLA-DQB1,IGHM,IL7R,IRF1 (includes EG:1636)                                    | 19        |
| CD52,CFD,F2RL1,HLA-DPB1,HLA-DQB1,IRF1 (includes EG:1636),LTB,MX1                                                 | 8         |



|                                                                         |    |
|-------------------------------------------------------------------------|----|
| CD52,CFD,F2RL1,HLA-DPB1,HLA-DQB1,IRF1 (includes EG:16362),LTB,MX1       | 8  |
| CD52,CFD,F2RL1,HLA-DPB1,HLA-DQB1,IRF1 (includes EG:16362),LTB,MX1       | 8  |
| BCL11B,CASP1,CD274,GIMAP4,HLA-DQA1,HLA-DQB1,IGHM,IL7R,IRF1 (include:    | 17 |
| BCL11B,CASP1,CD274,GIMAP4,HLA-DQA1,HLA-DQB1,IGHM,IL7R,IRF1 (include:    | 17 |
| BCL11B,CASP1,CD274,GIMAP4,HLA-DQA1,HLA-DQB1,IGHM,IL7R,IRF1 (include:    | 17 |
| BCL11B,CASP1,CD274,GIMAP4,HLA-DQA1,HLA-DQB1,IGHM,IL7R,IRF1 (include:    | 17 |
| BCL11B,CASP1,CD274,GIMAP4,HLA-DQA1,HLA-DQB1,IL7R,IRF1 (includes EG:1    | 16 |
| BCL11B,CASP1,CD274,GIMAP4,HLA-DQA1,HLA-DQB1,IL7R,IRF1 (includes EG:1    | 16 |
| BCL11B,CASP1,CD274,GIMAP4,HLA-DQA1,HLA-DQB1,IL7R,IRF1 (includes EG:1    | 16 |
| BCL11B,CASP1,CD274,GIMAP4,HLA-DQA1,HLA-DQB1,IL7R,IRF1 (includes EG:1    | 16 |
| BCL11B,CASP1,CD274,GIMAP4,HLA-DQA1,HLA-DQB1,IL7R,IRF1 (includes EG:1    | 16 |
| BCL11B,CASP1,CD274,GIMAP4,HLA-DQA1,HLA-DQB1,IL7R,IRF1 (includes EG:1    | 16 |
| BCL11B,CASP1,CD274,GIMAP4,HLA-DQA1,HLA-DQB1,IL7R,IRF1 (includes EG:1    | 16 |
| BCL11B,CASP1,CD274,GIMAP4,HLA-DQA1,HLA-DQB1,IL7R,IRF1 (includes EG:1    | 16 |
| BCL11B,F2RL1,HAL,HLA-DQA1,IGHM,IGKV1D-8,KRT1,LTB,MME,MX1,PDE4B,PE       | 16 |
| ALOX12,CA2,CARD16,CASP1,CD274,CLEC2B,DDX58,F2RL1,HLA-DQB1,IGHM,I        | 23 |
| ALOX12,AQP3,BAG1,BCL11B,CA2,CD274,DDX58,GAS2L1,GIMAP4,HEMGN,HLA         | 35 |
| ALOX12,ANKRD44,BTN3A1,BTN3A2,BTN3A3,CA2,CD274,CD52,CLEC2B,HLA-DF        | 21 |
| ALOX12,ANKRD44,BTN3A1,BTN3A2,BTN3A3,CA2,CD274,CD52,CLEC2B,HLA-DF        | 21 |
| ALOX12,ANKRD44,BTN3A1,BTN3A2,BTN3A3,CA2,CD274,CD52,CLEC2B,HLA-DF        | 21 |
| BCL11B,CASP1,CD274,FGL2,GIMAP4,GZMA,HSP90AB1,IGHM,IL7R,IRF1 (includ     | 17 |
| BCL11B,CD274,CX3CR1,DDX58,EPB42,F2RL1,HLA-DQA1,HLA-DQB1,IGHM,IL7F       | 24 |
| BCL11B,CD274,CX3CR1,DDX58,EPB42,F2RL1,HLA-DQA1,HLA-DQB1,IGHM,IL7F       | 24 |
| ALOX12,APOL6,AQP3,BAG1,BCL11B,CAMK1D,CASP1,CD274,CD46,CX3CR1,DI         | 54 |
| BCL11B,CASP1,CD274,CD52,DDX58,EPST11,HCAR3,IFIT2,IFIT3,IL7R,IRF1 (inclu | 22 |
| BCL11B,CASP1,CD274,CD52,DDX58,EPST11,HCAR3,IFIT2,IFIT3,IL7R,IRF1 (inclu | 22 |
| ALOX12,APOL6,AQP3,BAG1,BCL11B,CAMK1D,CASP1,CD274,CX3CR1,DDX58,F         | 46 |
| BTN3A1,CD274,CD46,F2RL1,FGL2,HLA-DQA1,HLA-DQB1,IGHM,IL32,IL7R,IRF1 (    | 22 |
| BTN3A1,CD274,CD46,F2RL1,FGL2,HLA-DQA1,HLA-DQB1,IGHM,IL32,IL7R,IRF1 (    | 22 |
| BCL11B,CD274,CX3CR1,DDX58,F2RL1,HLA-DQA1,HLA-DQB1,IGHM,IL7R,IRF1 (      | 22 |
| BCL11B,CD274,CX3CR1,DDX58,F2RL1,HLA-DQA1,HLA-DQB1,IGHM,IL7R,IRF1 (      | 22 |
| BCL11B,CD274,HLA-DQA1,HLA-DQB1,IGHM,IRF1 (includes EG:16362),LCK,PSM    | 8  |
| BCL11B,CD274,HLA-DQA1,HLA-DQB1,IGHM,IRF1 (includes EG:16362),LCK,PSM    | 8  |
| BTN3A1,CD274,CD46,F2RL1,FGL2,HLA-DQA1,HLA-DQB1,IGHM,IL7R,IRF1 (inclu    | 20 |
| BTN3A1,CD274,CD46,F2RL1,FGL2,HLA-DQA1,HLA-DQB1,IGHM,IL7R,IRF1 (inclu    | 20 |
| BTN3A1,CD274,CD46,F2RL1,FGL2,HLA-DQA1,HLA-DQB1,IGHM,IL7R,IRF1 (inclu    | 20 |
| BTN3A1,CD274,CD46,F2RL1,FGL2,HLA-DQA1,HLA-DQB1,IGHM,IL7R,IRF1 (inclu    | 21 |
| BTN3A1,CD274,CD46,F2RL1,FGL2,HLA-DQA1,HLA-DQB1,IGHM,IL7R,IRF1 (inclu    | 21 |
| BTN3A1,CD274,CD46,F2RL1,FGL2,HLA-DQA1,HLA-DQB1,IGHM,IL7R,IRF1 (inclu    | 21 |
| AGTRAP,ALOX12,BAG1,BCL11B,BTN3A1,CASP1,CD274,CD46,CLEC7A,F2RL1,F        | 53 |
| BAG1,EPB42,IFIT3,LCK,MME,PRKCH,SELENBP1,SLC6A8,TCN1,TPM1 (includes      | 12 |
| BAG1,EPB42,IFIT3,LCK,MME,PRKCH,SELENBP1,SLC6A8,TCN1,TPM1 (includes      | 12 |
| CLEC7A,F2RL1,HLA-DQA1,HLA-DQB1,IGHM,LTB,PSMB9,RORA,SLPI,SNCA,ST/        | 11 |
| CLEC7A,F2RL1,HLA-DQA1,HLA-DQB1,IGHM,LTB,PSMB9,RORA,SLPI,SNCA,ST/        | 11 |
| CLEC7A,F2RL1,HLA-DQA1,HLA-DQB1,IGHM,LTB,PSMB9,RORA,SLPI,SNCA,ST/        | 11 |
| CLEC7A,F2RL1,HLA-DQA1,HLA-DQB1,IGHM,LTB,PSMB9,RORA,SLPI,SNCA,ST/        | 11 |
| CASP1,CD52,EPST11,F2RL1,HLA-DQA1,HLA-DQB1,IL7R,ITGA4,MX1,TAP2           | 10 |
| CASP1,CD52,EPST11,F2RL1,HLA-DQA1,HLA-DQB1,IL7R,ITGA4,MX1,TAP2           | 10 |
| CASP1,CD52,EPST11,F2RL1,HLA-DQA1,HLA-DQB1,IL7R,ITGA4,MX1,TAP2           | 10 |
| CASP1,CD52,EPST11,F2RL1,HLA-DQA1,HLA-DQB1,HSPB1,IL7R,ITGA4,LRK2,M       | 15 |
| BCL11B,CD274,DDX58,GAS2L1,GIMAP4,HLA-DQA1,HLA-DQB1,IGHM,IL7R,IRF1       | 19 |
| BCL11B,CD274,DDX58,GAS2L1,GIMAP4,HLA-DQA1,HLA-DQB1,IGHM,IL7R,IRF1       | 19 |
| ALOX12,BAG1,BCL11B,CAMK1D,CASP1,CD274,CX3CR1,DDX58,F2RL1,FGL2,G         | 35 |
| ALOX12,ANKRD44,BTN3A1,BTN3A2,BTN3A3,CA2,CASP1,CD274,CD52,CFD,CLF        | 23 |

|                                                                         |    |
|-------------------------------------------------------------------------|----|
| AGTRAP,ALOX12,AQP3,BAG1,CA2,CASP1,F2RL1,HSP90AB1,HSPB1,IL7R,LCK,        | 27 |
| AGTRAP,ALOX12,AQP3,BAG1,CA2,CASP1,F2RL1,HSP90AB1,HSPB1,IL7R,LCK,        | 28 |
| CASP1,CD274,CLEC7A,DDX58,IRF1 (includes EG:16362),LCN2,LTB,PTGER4,RA    | 11 |
| ALOX12,BAG1,BCL11B,CAMK1D,CASP1,CD274,CX3CR1,DDX58,F2RL1,GALNT2         | 32 |
| CARD16,CD274,CD52,GBP2 (includes EG:14468),GZMA,HSP90AB1,IGHM,IL7R,I    | 21 |
| CARD16,CD274,CD52,GBP2 (includes EG:14468),GZMA,HSP90AB1,IGHM,IL7R,I    | 21 |
| BTN3A1,BTN3A2,BTN3A3,CD274,CLEC2B,HLA-DPB1,HLA-DQA1,HLA-DQB1,IGH        | 11 |
| BTN3A1,BTN3A2,BTN3A3,CD274,CLEC2B,HLA-DPB1,HLA-DQA1,HLA-DQB1,IGH        | 11 |
| BTN3A1,BTN3A2,BTN3A3,CD274,CLEC2B,HLA-DPB1,HLA-DQA1,HLA-DQB1,IGH        | 11 |
| BTN3A1,BTN3A2,BTN3A3,CD274,CLEC2B,HLA-DPB1,HLA-DQA1,HLA-DQB1,IGH        | 11 |
| BCL11B,CD274,CD52,DDX58,EPSTI1,HCAR3,IFIT2,IFIT3,IL7R,IRF1 (includes EG | 21 |
| ALOX12,BAG1,BCL11B,CASP1,CD274,DDX58,F2RL1,FGL2,GIMAP4,GZMA,HSP         | 44 |
| BCL11B,CD274,DDX58,GIMAP4,HLA-DQA1,HLA-DQB1,IGHM,IL7R,IRF1 (include:    | 15 |
| BCL11B,CD274,DDX58,GIMAP4,HLA-DQA1,HLA-DQB1,IGHM,IL7R,IRF1 (include:    | 15 |
| BCL11B,CD274,DDX58,GIMAP4,HLA-DQA1,HLA-DQB1,IGHM,IL7R,IRF1 (include:    | 15 |
| BCL11B,F2RL1,HLA-DQA1,IGHM,IGKV1D-8,KRT1,MME,MX1,PDE4B,PECAM1,S         | 12 |
| DDX58,IFIT2,IRF1 (includes EG:16362),LCN2,MX1,RARRES3,STAT1             | 7  |
| DDX58,IFIT2,IRF1 (includes EG:16362),LCN2,MX1,RARRES3,STAT1             | 7  |
| ALOX12,CASP1,CD274,DDX58,F2RL1,IGHM,LTB,MME,PDE4B,PTGER4                | 10 |
| ALOX12,CASP1,CD274,DDX58,F2RL1,IGHM,LTB,MME,PDE4B,PTGER4                | 10 |
| ALOX12,CASP1,CD274,DDX58,F2RL1,IGHM,LTB,MME,PDE4B,PTGER4                | 10 |
| BCL11B,CASP1,F2RL1,HLA-DQA1,IGHM,IGKV1D-8,KRT1,LTB,MME,MX1,PDE4B        | 13 |
| BCL11B,CASP1,F2RL1,HLA-DQA1,IGHM,IGKV1D-8,KRT1,LTB,MME,MX1,PDE4B        | 13 |
| BCL11B,CASP1,CD274,FGL2,GIMAP4,GZMA,IGHM,IL7R,LCK,LCN2,PECAM1,PF        | 13 |
| BCL11B,CD274,DDX58,GIMAP4,HLA-DQA1,HLA-DQB1,IGHM,IL7R,IRF1 (include:    | 14 |
| BCL11B,CD274,DDX58,GIMAP4,HLA-DQA1,HLA-DQB1,IGHM,IL7R,IRF1 (include:    | 14 |
| BCL11B,CD274,DDX58,GIMAP4,HLA-DQA1,HLA-DQB1,IGHM,IL7R,IRF1 (include:    | 14 |
| BCL11B,CAMK1D,CASP1,CD274,CX3CR1,F2RL1,ITGA4,LCK,LRRK2,LTB,OLFM4        | 20 |
| BCL11B,CAMK1D,CASP1,CD274,CX3CR1,F2RL1,ITGA4,LCK,LRRK2,LTB,OLFM4        | 20 |
| BCL11B,CAMK1D,CASP1,CD274,CX3CR1,F2RL1,ITGA4,LCK,LRRK2,LTB,OLFM4        | 20 |
| BCL11B,CASP1,CD274,F2RL1,FGL2,IGHM,IL32,ITGA4,LTB,OLFM4,PF4,PPBP,RI     | 14 |
| BCL11B,CD274,CD46,DDX58,EPB42,HLA-DQA1,HLA-DQB1,IGHM,IL7R,IRF1 (inc     | 25 |
| CASP1,CD274,CFD,CLEC2B,F2RL1,GZMA,IGHM,LCN2,LTB,OLFM4,RETN,SLPI,        | 15 |
| BCL11B,CD274,CD52,DDX58,EPSTI1,HCAR3,IFIT2,IFIT3,IL7R,ITGA4,LCK,PDE4f   | 16 |
| BCL11B,CD274,CD52,DDX58,EPSTI1,HCAR3,IFIT2,IFIT3,IL7R,ITGA4,LCK,PDE4f   | 16 |
| CASP1,CD46,FCGR3B,GZMA,LCK,SGK1,SLAMF7,SNCA,STAT1,TAP2                  | 10 |
| CA2,F2RL1,FGL2,GZMA,HSP90AB1,HSPB1,IFIT3,ITGA4,KRT1,LCN2,PI3,PSMB9      | 17 |
| CA2,F2RL1,FGL2,GZMA,HSP90AB1,HSPB1,IFIT3,ITGA4,KRT1,LCN2,PI3,PSMB9      | 17 |
| BCL11B,CD274,DDX58,HLA-DQA1,HLA-DQB1,IGHM,IL7R,IRF1 (includes EG:163    | 14 |
| BCL11B,CD274,DDX58,HLA-DQA1,HLA-DQB1,IGHM,IL7R,IRF1 (includes EG:163    | 14 |
| CD274,CD46,IL32,ITGA4,PF4,PTGER4                                        | 6  |
| CD274,CD46,IL32,ITGA4,PF4,PTGER4                                        | 6  |
| ANKRD9,AQP3,CA2,CASP1,CD274,HSP90AB1,IRF1 (includes EG:16362),KCNJ2,    | 21 |
| ANKRD9,AQP3,CA2,CASP1,CD274,HSP90AB1,IRF1 (includes EG:16362),KCNJ2,    | 21 |
| CA2,F2RL1,FGL2,GZMA,LCN2,PI3,SLPI,STAT1,TNFAIP2                         | 9  |
| CA2,F2RL1,FGL2,GZMA,LCN2,PI3,SLPI,STAT1,TNFAIP2                         | 9  |
| CAMK1D,CD274,CLEC7A,DDX58,F2RL1,FCGR3B,IGHM,LY75,PECAM1,PF4,UBE         | 11 |
| BCL11B,CASP1,CD274,FGL2,GIMAP4,GZMA,IGHM,IL7R,LCK,LCN2,PECAM1,ST        | 12 |
| BCL11B,F2RL1,HLA-DQA1,IGHM,IGKV1D-8,KRT1,MX1,PDE4B,STAT1,TPM1 (inc      | 10 |
| BCL11B,F2RL1,HLA-DQA1,IGHM,IGKV1D-8,KRT1,MX1,PDE4B,STAT1,TPM1 (inc      | 10 |
| BCL11B,F2RL1,HLA-DQA1,IGHM,IGKV1D-8,KRT1,MX1,PDE4B,STAT1,TPM1 (inc      | 10 |
| CASP1,CD274,CLEC7A,DDX58,IRF1 (includes EG:16362),LTB,PTGER4,SLPI,ST/   | 9  |

|                                                                                   |    |
|-----------------------------------------------------------------------------------|----|
| CAMK1D,CASP1,CLEC7A,CX3CR1,F2RL1,IGHM,ITGA4,LCN2,LRRK2,LY75,PDE4B                 | 18 |
| BCL11B,CD274,CX3CR1,DDX58,EPB42,F2RL1,HLA-DQA1,HLA-DQB1,HSPB1,IG                  | 29 |
| BCL11B,CASP1,CD274,GIMAP4,GZMA,IGHM,IL7R,LCK,LCN2,PECAM1,STAT1                    | 11 |
| BCL11B,CD274,DDX58,HLA-DQA1,HLA-DQB1,IGHM,IL7R,IRF1 (includes EG:16362)           | 16 |
| BCL11B,CD274,DDX58,HLA-DQA1,HLA-DQB1,IGHM,IL7R,IRF1 (includes EG:16362)           | 16 |
| HLA-DQB1,IL7R,ITGA4,LTB,PSMB9,RORA,STAT1                                          | 7  |
| HLA-DQB1,IL7R,ITGA4,LTB,PSMB9,RORA,STAT1                                          | 7  |
| BAG1,CD274,CX3CR1,ITGA4,PECAM1,PPBP,SLPI                                          | 7  |
| BCL11B,CD274,CX3CR1,F2RL1,ITGA4,LCK,LTB,OLFM4,PECAM1,PF4,RASGRP1                  | 13 |
| BCL11B,CD274,CX3CR1,F2RL1,ITGA4,LCK,LTB,OLFM4,PECAM1,PF4,RASGRP1                  | 13 |
| BCL11B,CD274,CX3CR1,F2RL1,ITGA4,LCK,LTB,OLFM4,PECAM1,PF4,RASGRP1                  | 13 |
| CD274,CD46,IL32,ITGA4,PTGER4                                                      | 5  |
| CD274,CD46,IL32,ITGA4,PTGER4                                                      | 5  |
| PI3,SLPI                                                                          | 2  |
| PI3,SLPI                                                                          | 2  |
| IRF1 (includes EG:16362),STAT1                                                    | 2  |
| BCL11B,CASP1,CD274,GIMAP4,GZMA,IL7R,LCK,LCN2,PECAM1,STAT1                         | 10 |
| CX3CR1,HLA-DQA1,LTB,ZFP36L2                                                       | 4  |
| CAMK1D,CASP1,CX3CR1,F2RL1,ITGA4,LRRK2,LTB,OLFM4,PDE4B,PECAM1,PF4                  | 15 |
| CAMK1D,CASP1,CX3CR1,F2RL1,ITGA4,LRRK2,LTB,OLFM4,PDE4B,PECAM1,PF4                  | 15 |
| CAMK1D,CASP1,CX3CR1,F2RL1,ITGA4,LRRK2,LTB,OLFM4,PDE4B,PECAM1,PF4                  | 15 |
| BTN3A1,CD274,CD46,F2RL1,FGL2,HLA-DQA1,HLA-DQB1,IGHM,IL7R,IRF1 (includes EG:16362) | 15 |
| BTN3A1,CD274,CD46,F2RL1,FGL2,HLA-DQA1,HLA-DQB1,IGHM,IL7R,IRF1 (includes EG:16362) | 15 |
| BTN3A1,CD274,CD46,F2RL1,FGL2,HLA-DQA1,HLA-DQB1,IGHM,IL7R,IRF1 (includes EG:16362) | 15 |
| CLEC7A,F2RL1,IGHM,IRF1 (includes EG:16362),LCK,PARP14,RARRES3,RASGRP1             | 9  |
| CLEC7A,F2RL1,IGHM,IRF1 (includes EG:16362),LCK,PARP14,RARRES3,RASGRP1             | 9  |
| AGTRAP,DDX58,F2RL1,GPR146,HSP90AB1,IRF1 (includes EG:16362),LCK,MX1,SLPI          | 14 |
| ITGA4,LCK,LCN2,LEF1,SLPI,TCN1                                                     | 6  |
| ITGA4,LCK,LCN2,LEF1,SLPI,TCN1                                                     | 6  |
| IL7R,IRF1 (includes EG:16362),LCK                                                 | 3  |
| IL7R,IRF1 (includes EG:16362),LCK                                                 | 3  |
| CD274,CX3CR1,GIMAP4,HLA-DQB1,IGHM,IRF1 (includes EG:16362),LY75,RASGRP1           | 10 |
| CD274,CX3CR1,GIMAP4,HLA-DQB1,IGHM,IRF1 (includes EG:16362),LY75,RASGRP1           | 10 |
| CASP1,CD46,CX3CR1,GZMA,LCK,MME,PF4,SLAMF7,STAT1                                   | 9  |
| CD52,GBP2 (includes EG:14468),GZMA,IGHM,IL7R,IRF1 (includes EG:16362),LEI         | 13 |
| CD52,GBP2 (includes EG:14468),GZMA,IGHM,IL7R,IRF1 (includes EG:16362),LEI         | 13 |
| IGHM,IL7R,LEF1,STAT1                                                              | 4  |
| IGHM,IL7R,LEF1,STAT1                                                              | 4  |
| IGHM,IL7R,LEF1,STAT1                                                              | 4  |
| IGHM,IL7R,LEF1,STAT1                                                              | 4  |
| IGHM,IL7R,LEF1,STAT1                                                              | 4  |
| BCL11B,CD274,CD46,CLEC7A,GZMA,IGHM,IRF1 (includes EG:16362),LCK,PECAM1            | 12 |
| BCL11B,CD274,CD46,CLEC7A,GZMA,IGHM,IRF1 (includes EG:16362),LCK,PECAM1            | 12 |
| BCL11B,CD274,CD46,CLEC7A,GZMA,IGHM,IRF1 (includes EG:16362),LCK,PECAM1            | 12 |
| BCL11B,CD274,CD46,CLEC7A,GZMA,IGHM,IRF1 (includes EG:16362),LCK,PECAM1            | 12 |
| KRT1,LCN2,PI3,SLPI,STAT1,TCN1                                                     | 6  |
| CD274,HLA-DQA1,HLA-DQB1,IGHM,IRF1 (includes EG:16362),LCK,SEMA4D                  | 7  |
| CD274,HLA-DQA1,HLA-DQB1,IGHM,IRF1 (includes EG:16362),LCK,SEMA4D                  | 7  |
| DDX58,STAT1                                                                       | 2  |
| DDX58,STAT1                                                                       | 2  |
| DDX58,STAT1                                                                       | 2  |
| DDX58,STAT1                                                                       | 2  |

|                                                                          |    |
|--------------------------------------------------------------------------|----|
| RARRES3,STAT1                                                            | 2  |
| ANKRD9,AQP3,BAG1,CA2,CASP1,CD274,HSP90AB1,IRF1 (includes EG:16362),IRF1  | 25 |
| ANKRD9,AQP3,BAG1,CA2,CASP1,CD274,HSP90AB1,IRF1 (includes EG:16362),IRF1  | 25 |
| CAMK1D,CASP1,ITGA4,PDE4B,PF4,PPBP,SLPI                                   | 7  |
| CAMK1D,CASP1,ITGA4,PDE4B,PF4,PPBP,SLPI                                   | 7  |
| CAMK1D,CASP1,ITGA4,PDE4B,PF4,PPBP,SLPI                                   | 7  |
| CAMK1D,CASP1,ITGA4,PDE4B,PF4,PPBP,SLPI                                   | 7  |
| CAMK1D,CASP1,CX3CR1,F2RL1,ITGA4,LCK,LEF1,LRRK2,PDE4B,PF4,PPBP,SE         | 13 |
| BCL11B,CD274,HLA-DQA1,IL7R,IRF1 (includes EG:16362),LCK,LEF1,PTGER4,RETN | 10 |
| BCL11B,CD274,HLA-DQA1,IL7R,IRF1 (includes EG:16362),LCK,LEF1,PTGER4,RETN | 10 |
| BCL11B,CD274,HLA-DQA1,IL7R,IRF1 (includes EG:16362),LCK,LEF1,PTGER4,RETN | 10 |
| BCL11B,CD274,HLA-DQA1,IL7R,IRF1 (includes EG:16362),LCK,LEF1,PTGER4,RETN | 10 |
| BCL11B,CD274,HLA-DQA1,IL7R,IRF1 (includes EG:16362),LCK,LEF1,PTGER4,RETN | 10 |
| BCL11B,CD274,HLA-DQA1,IL7R,IRF1 (includes EG:16362),LCK,LEF1,PTGER4,RETN | 10 |
| F2RL1,HAL,IGHM,MX1,PI3,PTGER4                                            | 6  |
| CLEC7A,F2RL1,GZMA,LCN2,LTB,PF4,RORA,SLPI,SNCA,STAT1                      | 10 |
| CLEC7A,F2RL1,GZMA,LCN2,LTB,PF4,RORA,SLPI,SNCA,STAT1                      | 10 |
| CLEC7A,F2RL1,GZMA,LCN2,LTB,PF4,RORA,SLPI,SNCA,STAT1                      | 10 |
| CLEC7A,F2RL1,GZMA,LCN2,LTB,PF4,RORA,SLPI,SNCA,STAT1                      | 10 |
| CASP1,CD46,IRF1 (includes EG:16362),RARRES3,STAT1                        | 5  |
| CASP1,CD46,IRF1 (includes EG:16362),RARRES3,STAT1                        | 5  |
| CASP1,CD46,IRF1 (includes EG:16362),RARRES3,STAT1                        | 5  |
| AGTRAP,DDX58,F2RL1,GPR146,MX1,RETN,SGK1,SLPI,STAT1                       | 9  |
| CD52,EPST11,ITGA4,MX1                                                    | 4  |
| CD52,EPST11,ITGA4,MX1                                                    | 4  |
| CD52,EPST11,ITGA4,MX1                                                    | 4  |
| CD274,HLA-DQB1,IGHM,IRF1 (includes EG:16362),PSMB9                       | 5  |
| AK1,BCL11B,BTN3A1,CA2,CASP1,GBP1,HSPB1,LRRK2,MAN1A1,OSBPL8,PDE4B         | 16 |
| ANKRD9,AQP3,CA2,CD274,KCNJ2,LCN2,MME,OLFM4,PECAM1,POLB,PTGER4,RETN       | 17 |
| ANKRD9,AQP3,CA2,CD274,KCNJ2,LCN2,MME,OLFM4,PECAM1,POLB,PTGER4,RETN       | 17 |
| CAMK1D,CASP1,CX3CR1,F2RL1,ITGA4,LRRK2,LTB,PDE4B,PECAM1,PF4,PPBP          | 14 |
| CAMK1D,CASP1,CX3CR1,F2RL1,ITGA4,LRRK2,LTB,PDE4B,PECAM1,PF4,PPBP          | 14 |
| CAMK1D,CASP1,CX3CR1,F2RL1,ITGA4,LRRK2,LTB,PDE4B,PECAM1,PF4,PPBP          | 14 |
| CAMK1D,CASP1,CX3CR1,F2RL1,ITGA4,LRRK2,LTB,PDE4B,PECAM1,PF4,PPBP          | 14 |
| IGHM,IL7R,LEF1,LY75,PECAM1,SEMA4D,SLAMF7,SLPI,STAT1                      | 9  |
| IGHM,IL7R,LEF1,LY75,PECAM1,SEMA4D,SLAMF7,SLPI,STAT1                      | 9  |
| IGHM,IL7R,LEF1,LY75,PECAM1,SEMA4D,SLAMF7,SLPI,STAT1                      | 9  |
| IGHM,IL7R,LEF1,LY75,PECAM1,SEMA4D,SLAMF7,SLPI,STAT1                      | 9  |
| HLA-DPB1,HLA-DQB1,IL7R,LTB,TBC1D9                                        | 5  |
| HLA-DPB1,HLA-DQB1,IL7R,LTB,TBC1D9                                        | 5  |
| HLA-DPB1,HLA-DQB1,IL7R,LTB,TBC1D9                                        | 5  |
| HLA-DPB1,HLA-DQB1,IL7R,LTB,TBC1D9                                        | 5  |
| HLA-DPB1,HLA-DQB1,IL7R,LTB,TBC1D9                                        | 5  |
| BCL11B,CD274,CD46,CLEC7A,GZMA,LCK,PECAM1,PTGER4,SEMA4D,STAT1             | 10 |
| BCL11B,CD274,CD46,CLEC7A,GZMA,LCK,PECAM1,PTGER4,SEMA4D,STAT1             | 10 |
| BCL11B,CD274,CD46,CLEC7A,GZMA,LCK,PECAM1,PTGER4,SEMA4D,STAT1             | 10 |
| BCL11B,CD274,CD46,CLEC7A,GZMA,LCK,PECAM1,PTGER4,SEMA4D,STAT1             | 10 |
| IL7R,LEF1,PARP14,PF4,PPBP,SEMA4D,STAT1                                   | 7  |
| CASP1,F2RL1,IL32,MME,PDE4B                                               | 5  |
| CASP1,F2RL1,IL32,MME,PDE4B                                               | 5  |
| CASP1,F2RL1,IL32,MME,PDE4B                                               | 5  |
| F2RL1,IL32,PECAM1,STAT1                                                  | 4  |

|                                                                       |    |
|-----------------------------------------------------------------------|----|
| IGHM,SEMA4D                                                           | 2  |
| IGHM,SEMA4D                                                           | 2  |
| ALOX12,F2RL1                                                          | 2  |
| ALOX12,F2RL1                                                          | 2  |
| ALOX12,F2RL1                                                          | 2  |
| ALOX12,F2RL1                                                          | 2  |
| ALOX12,F2RL1                                                          | 2  |
| ALOX12,F2RL1                                                          | 2  |
| IL7R,PTGER4                                                           | 2  |
| F2RL1,FCGR3B,PF4,PPBP                                                 | 4  |
| F2RL1,FCGR3B,PF4,PPBP                                                 | 4  |
| BCL11B,CD274,CX3CR1,F2RL1,ITGA4,LCK,LTB,PECAM1,RASGRP1,SEMA4D         | 10 |
| BCL11B,CD274,CX3CR1,F2RL1,ITGA4,LCK,LTB,PECAM1,RASGRP1,SEMA4D         | 10 |
| BCL11B,CD274,CX3CR1,F2RL1,ITGA4,LCK,LTB,PECAM1,RASGRP1,SEMA4D         | 10 |
| CASP1,HSP90AB1,IRF1 (includes EG:16362),LCN2,PF4,PTGER4,STAT1         | 7  |
| IL7R,LEF1,STAT1                                                       | 3  |
| CAMK1D,CASP1,CX3CR1,ITGA4,LRRK2,PDE4B,PF4,PPBP,SLPI                   | 9  |
| CAMK1D,CASP1,CX3CR1,ITGA4,LRRK2,PDE4B,PF4,PPBP,SLPI                   | 9  |
| CAMK1D,CASP1,CX3CR1,ITGA4,LRRK2,PDE4B,PF4,PPBP,SLPI                   | 9  |
| CAMK1D,CASP1,CX3CR1,ITGA4,LRRK2,PDE4B,PF4,PPBP,SLPI                   | 9  |
| HLA-DQB1,IGHM,LTB                                                     | 3  |
| HLA-DQB1,IGHM,LTB                                                     | 3  |
| CAMK1D,CASP1,CX3CR1,ITGA4,LRRK2,PDE4B,PF4,PPBP,SLPI                   | 9  |
| CAMK1D,CASP1,CX3CR1,ITGA4,LRRK2,PDE4B,PF4,PPBP,SLPI                   | 9  |
| CAMK1D,CASP1,CX3CR1,ITGA4,LRRK2,PDE4B,PF4,PPBP,SLPI                   | 9  |
| CAMK1D,CASP1,CX3CR1,ITGA4,LRRK2,PDE4B,PF4,PPBP,SLPI                   | 9  |
| CD274,CD46,IL32,PTGER4                                                | 4  |
| CD274,CD46,IL32,PTGER4                                                | 4  |
| CASP1,CLEC7A,DDX58,LCN2,MX1                                           | 5  |
| BCL11B,CASP1,CD274,F2RL1,ITGA4,LTB,OLFM4,PF4,PPBP,RETN,STAT1          | 11 |
| BCL11B,CASP1,CD274,F2RL1,ITGA4,LTB,OLFM4,PF4,PPBP,RETN,STAT1          | 11 |
| BCL11B,CASP1,CD274,F2RL1,ITGA4,LTB,OLFM4,PF4,PPBP,RETN,STAT1          | 11 |
| CX3CR1,F2RL1,IGHM,IRF1 (includes EG:16362),LCN2,LTB,PI3,SNCA          | 8  |
| CX3CR1,F2RL1,IGHM,IRF1 (includes EG:16362),LCN2,LTB,PI3,SNCA          | 8  |
| BCL11B,EPB42,HLA-DQB1,IGHM,IL7R,IRF1 (includes EG:16362),LTB,PECAM1,S | 9  |
| BCL11B,EPB42,HLA-DQB1,IGHM,IL7R,IRF1 (includes EG:16362),LTB,PECAM1,S | 9  |
| BCL11B,EPB42,HLA-DQB1,IGHM,IL7R,IRF1 (includes EG:16362),LTB,PECAM1,S | 9  |
| BCL11B,EPB42,HLA-DQB1,IGHM,IL7R,IRF1 (includes EG:16362),LTB,PECAM1,S | 9  |
| GAS2L1,LEF1,MME,PECAM1,PTGER4,STAT1                                   | 6  |
| ALOX12,CD46,FCGR3B,IGHM,ITGA4,LCK,PECAM1,PF4,PPBP,PTGER4,RASGRI       | 11 |
| ALOX12,CD46,FCGR3B,IGHM,ITGA4,LCK,PECAM1,PF4,PPBP,PTGER4,RASGRI       | 11 |
| CAMK1D,CASP1,CX3CR1,F2RL1,ITGA4,LRRK2,PDE4B,PF4,PPBP,SLPI             | 10 |
| CAMK1D,CASP1,CX3CR1,F2RL1,ITGA4,LRRK2,PDE4B,PF4,PPBP,SLPI             | 10 |
| CAMK1D,CASP1,CX3CR1,F2RL1,ITGA4,LRRK2,PDE4B,PF4,PPBP,SLPI             | 10 |
| CAMK1D,CASP1,CX3CR1,F2RL1,ITGA4,LRRK2,PDE4B,PF4,PPBP,SLPI             | 10 |
| IL7R,LEF1,MX1,PARP14,PF4,PPBP,SEMA4D,STAT1                            | 8  |
| CD274,CLEC7A,DDX58,LTB,PTGER4                                         | 5  |
| CASP1,IRF1 (includes EG:16362),RORA,STAT1                             | 4  |
| CASP1,IRF1 (includes EG:16362),RORA,STAT1                             | 4  |
| CASP1,IRF1 (includes EG:16362),RORA,STAT1                             | 4  |
| CASP1,IRF1 (includes EG:16362),RORA,STAT1                             | 4  |
| CASP1,IRF1 (includes EG:16362),RORA,STAT1                             | 4  |

|                                                                       |    |
|-----------------------------------------------------------------------|----|
| CASP1,IRF1 (includes EG:16362),RORA,STAT1                             | 4  |
| IRF1 (includes EG:16362),RARRES3,STAT1                                | 3  |
| IRF1 (includes EG:16362),RARRES3,STAT1                                | 3  |
| IRF1 (includes EG:16362),RARRES3,STAT1                                | 3  |
| ITGA4,LCK,PI3,PKN2,SLPI                                               | 5  |
| ITGA4,LCK,PI3,PKN2,SLPI                                               | 5  |
| CD274,ITGA4,PECAM1,PF4,PPBP                                           | 5  |
| CD274,ITGA4,PECAM1,PF4,PPBP                                           | 5  |
| CD274,ITGA4,PECAM1,PF4,PPBP                                           | 5  |
| CASP1,IRF1 (includes EG:16362),RARRES3,STAT1                          | 4  |
| CASP1,IRF1 (includes EG:16362),RARRES3,STAT1                          | 4  |
| CASP1,IRF1 (includes EG:16362),RARRES3,STAT1                          | 4  |
| BCL11B,CD274,CX3CR1,F2RL1,ITGA4,LCK,LTB,PECAM1,RASGRP1                | 9  |
| BCL11B,CD274,CX3CR1,F2RL1,ITGA4,LCK,LTB,PECAM1,RASGRP1                | 9  |
| BCL11B,CD274,CX3CR1,F2RL1,ITGA4,LCK,LTB,PECAM1,RASGRP1                | 9  |
| CLEC7A,STAT1                                                          | 2  |
| CLEC7A,STAT1                                                          | 2  |
| CLEC7A,STAT1                                                          | 2  |
| IGHM,LTB                                                              | 2  |
| IGHM,LTB                                                              | 2  |
| IGHM,LTB                                                              | 2  |
| IGHM,LTB                                                              | 2  |
| IGHM,LTB                                                              | 2  |
| IGHM,LTB                                                              | 2  |
| LCN2,PECAM1                                                           | 2  |
| IRF1 (includes EG:16362),OLFM4                                        | 2  |
| IRF1 (includes EG:16362),LCK                                          | 2  |
| PF4,PPBP                                                              | 2  |
| PF4,PPBP                                                              | 2  |
| PF4,PPBP                                                              | 2  |
| PF4,PPBP                                                              | 2  |
| CASP1,HSP90AB1,IRF1 (includes EG:16362),LCN2,PF4,PTGER4,SLPI,STAT1    | 8  |
| CD274,EPSTI1,HCAR3,IFIT2,IFIT3,IGHM,PF4,PSMB9,TNS1                    | 9  |
| BCL11B,EPB42,HLA-DQB1,IGHM,IL7R,IRF1 (includes EG:16362),LCK,LCN2,PEC | 10 |
| BCL11B,EPB42,HLA-DQB1,IGHM,IL7R,IRF1 (includes EG:16362),LCK,LCN2,PEC | 10 |
| BCL11B,EPB42,HLA-DQB1,IGHM,IL7R,IRF1 (includes EG:16362),LCK,LCN2,PEC | 10 |
| BCL11B,CASP1,GIMAP4,GZMA,IGHM,LCN2,PF4                                | 7  |
| CD274,EPSTI1,HCAR3,IFIT2,IFIT3,PF4                                    | 6  |
| CD274,EPSTI1,HCAR3,IFIT2,IFIT3,PF4                                    | 6  |
| CD274,EPSTI1,HCAR3,IFIT2,IFIT3,PF4                                    | 6  |
| CASP1,CLEC7A,DDX58,IRF1 (includes EG:16362),PTGER4,SLPI,STAT1         | 7  |
| CASP1,CLEC7A,DDX58,IRF1 (includes EG:16362),PTGER4,SLPI,STAT1         | 7  |
| ALOX12,CD46,FCGR3B,ITGA4,LCK,PECAM1,PF4,PPBP,PTGER4,RASGRP1           | 10 |
| ALOX12,CD46,FCGR3B,ITGA4,LCK,PECAM1,PF4,PPBP,PTGER4,RASGRP1           | 10 |
| ALOX12,CD46,FCGR3B,ITGA4,LCK,PECAM1,PF4,PPBP,PTGER4,RASGRP1           | 10 |
| ALOX12,CD46,FCGR3B,ITGA4,LCK,PECAM1,PF4,PPBP,PTGER4,RASGRP1           | 10 |
| F2RL1,IGHM,IRF1 (includes EG:16362),LTB,PI3                           | 5  |
| F2RL1,IGHM,IRF1 (includes EG:16362),LTB,PI3                           | 5  |
| F2RL1,IGHM,IRF1 (includes EG:16362),LTB,PI3                           | 5  |
| CASP1,CLEC7A,IRF1 (includes EG:16362),PTGER4,SLPI,STAT1               | 6  |
| CASP1,CLEC7A,IRF1 (includes EG:16362),PTGER4,SLPI,STAT1               | 6  |
| PF4,PPBP                                                              | 2  |
| PF4,PPBP                                                              | 2  |

|                                                                          |    |
|--------------------------------------------------------------------------|----|
| IGHM,IL7R,PECAM1,SEMA4D                                                  | 4  |
| IGHM,IL7R,PECAM1,SEMA4D                                                  | 4  |
| IGHM,IL7R,PECAM1,SEMA4D                                                  | 4  |
| IRF1 (includes EG:16362),LCN2,STAT1                                      | 3  |
| BCL11B,EPB42,HLA-DQB1,IGHM,IL7R,IRF1 (includes EG:16362),LTB             | 7  |
| BCL11B,EPB42,HLA-DQB1,IGHM,IL7R,IRF1 (includes EG:16362),LTB             | 7  |
| BCL11B,EPB42,HLA-DQB1,IGHM,IL7R,IRF1 (includes EG:16362),LTB             | 7  |
| BCL11B,EPB42,HLA-DQB1,IGHM,IL7R,IRF1 (includes EG:16362),LTB             | 7  |
| BCL11B,EPB42,HLA-DQB1,IGHM,IL7R,IRF1 (includes EG:16362),LTB             | 7  |
| BCL11B,DDX58,HLA-DQA1,HLA-DQB1,IGHM,IL7R,LCK,LTB,RASGRP1                 | 9  |
| BCL11B,DDX58,HLA-DQA1,HLA-DQB1,IGHM,IL7R,LCK,LTB,RASGRP1                 | 9  |
| CAMK1D,CASP1,F2RL1,ITGA4,PDE4B,PECAM1,PF4,PPBP,SLPI                      | 9  |
| CAMK1D,CASP1,F2RL1,ITGA4,PDE4B,PECAM1,PF4,PPBP,SLPI                      | 9  |
| CAMK1D,CASP1,F2RL1,ITGA4,PDE4B,PECAM1,PF4,PPBP,SLPI                      | 9  |
| CAMK1D,CASP1,F2RL1,ITGA4,PDE4B,PECAM1,PF4,PPBP,SLPI                      | 9  |
| IL7R,LTB,PECAM1,PPBP,STAT1                                               | 5  |
| IRF1 (includes EG:16362),LCK,SGK1                                        | 3  |
| CASP1,IRF1 (includes EG:16362),RARRES3,STAT1                             | 4  |
| CASP1,IRF1 (includes EG:16362),RARRES3,STAT1                             | 4  |
| CASP1,IRF1 (includes EG:16362),RARRES3,STAT1                             | 4  |
| CD274,F2RL1,HLA-DQB1,IGHM,LCK,LTB,RASGRP1,SEMA4D                         | 8  |
| CD274,F2RL1,HLA-DQB1,IGHM,LCK,LTB,RASGRP1,SEMA4D                         | 8  |
| BCL11B,DDX58,HLA-DQA1,HLA-DQB1,IGHM,IL7R,LCK,LTB,RASGRP1,STAT1           | 10 |
| CASP1,FCGR3B,GZMA,LCK,STAT1,TAP2                                         | 6  |
| ALOX12,CASP1,HSP90AB1                                                    | 3  |
| CAMK1D,CLEC7A,F2RL1,FCGR3B,IGHM,LY75,PECAM1,PF4,SNCA                     | 9  |
| DDX58,GPR146,IRF1 (includes EG:16362),RARRES3                            | 4  |
| CASP1,GBP1,GBP2 (includes EG:14468),HSP90AB1,IRF1 (includes EG:16362),LC | 8  |
| CASP1,CD274,CLEC7A,HLA-DQB1,IL7R,LTB,PF4                                 | 7  |
| BCL11B,IL7R,LCK                                                          | 3  |
| BCL11B,IL7R,LCK                                                          | 3  |
| LRRK2,SNCA                                                               | 2  |
| LRRK2,SNCA                                                               | 2  |
| LRRK2,SNCA                                                               | 2  |
| PF4,PPBP                                                                 | 2  |
| PF4,PPBP                                                                 | 2  |
| PF4,PPBP                                                                 | 2  |
| IGHM,IL32,IL7R,LEF1,PF4,RASGRP1,STAT1                                    | 7  |
| IGHM,IL32,IL7R,LEF1,PF4,RASGRP1,STAT1                                    | 7  |
| IGHM,IL32,IL7R,LEF1,PF4,RASGRP1,STAT1                                    | 7  |
| IGHM,IL32,IL7R,LEF1,PF4,RASGRP1,STAT1                                    | 7  |
| F2RL1,GZMA,LCN2,PF4,RORA,SLPI,SNCA,STAT1                                 | 8  |
| F2RL1,GZMA,LCN2,PF4,RORA,SLPI,SNCA,STAT1                                 | 8  |
| F2RL1,GZMA,LCN2,PF4,RORA,SLPI,SNCA,STAT1                                 | 8  |
| F2RL1,GZMA,LCN2,PF4,RORA,SLPI,SNCA,STAT1                                 | 8  |
| CD274,EPSTI1,HCAR3,IFIT2,IFIT3,PF4,PSMB9,TNS1                            | 8  |
| CD274,EPSTI1,HCAR3,IFIT2,IFIT3,PF4,PSMB9,TNS1                            | 8  |
| CD274,EPSTI1,HCAR3,IFIT2,IFIT3,PF4,PSMB9,TNS1                            | 8  |
| ALOX12,HSP90AB1,IRF1 (includes EG:16362),LCN2,PRKCH,STAT1                | 6  |
| CD274,LY75,PSMB9                                                         | 3  |
| CD274,LY75,PSMB9                                                         | 3  |
| CD274,IRF1 (includes EG:16362),STAT1                                     | 3  |

|                                                                         |    |
|-------------------------------------------------------------------------|----|
| CD274,IRF1 (includes EG:16362),STAT1                                    | 3  |
| ANKRD9,CA2,CAMK1D,CARD16,CASP1,CD46,DDX58,DDX60L,IRF1 (includes EC      | 15 |
| CAMK1D,CASP1,F2RL1,ITGA4,OLFM4,PDE4B,PECAM1,PF4,PPBP,SLPI               | 10 |
| CAMK1D,CASP1,F2RL1,ITGA4,OLFM4,PDE4B,PECAM1,PF4,PPBP,SLPI               | 10 |
| CAMK1D,CASP1,F2RL1,ITGA4,OLFM4,PDE4B,PECAM1,PF4,PPBP,SLPI               | 10 |
| BCL11B,CD274,F2RL1,ITGA4,LCK,LTB,RASGRP1                                | 7  |
| BCL11B,CD274,F2RL1,ITGA4,LCK,LTB,RASGRP1                                | 7  |
| BCL11B,CD274,F2RL1,ITGA4,LCK,LTB,RASGRP1                                | 7  |
| BCL11B,CD274,F2RL1,ITGA4,LCK,LTB,RASGRP1                                | 7  |
| HLA-DQB1,IL7R,ITGA4,PSMB9,RORA                                          | 5  |
| HLA-DQB1,IL7R,ITGA4,PSMB9,RORA                                          | 5  |
| HLA-DQB1,IL7R,ITGA4,PSMB9,RORA                                          | 5  |
| CD274,IRF1 (includes EG:16362),LEF1,PTGER4,RORA,STAT1                   | 6  |
| CD274,IRF1 (includes EG:16362),LEF1,PTGER4,RORA,STAT1                   | 6  |
| CD274,IRF1 (includes EG:16362),LEF1,PTGER4,RORA,STAT1                   | 6  |
| CD274,IRF1 (includes EG:16362),LEF1,PTGER4,RORA,STAT1                   | 6  |
| CD274,IRF1 (includes EG:16362),LEF1,PTGER4,RORA,STAT1                   | 6  |
| CD274,IRF1 (includes EG:16362),LEF1,PTGER4,RORA,STAT1                   | 6  |
| CD274,ITGA4,PECAM1,PPBP,SLPI                                            | 5  |
| CD274,ITGA4,PECAM1,PPBP,SLPI                                            | 5  |
| CD274,ITGA4,PECAM1,PPBP,SLPI                                            | 5  |
| GZMA,IL7R,LCN2                                                          | 3  |
| CD274,HLA-DQB1,IGHM,LCK,LTB                                             | 5  |
| CD274,HLA-DQB1,IGHM,LCK,LTB                                             | 5  |
| DDX58,HLA-DQA1,HLA-DQB1,IGHM,IL7R,LCK,LTB,RASGRP1                       | 8  |
| DDX58,HLA-DQA1,HLA-DQB1,IGHM,IL7R,LCK,LTB,RASGRP1                       | 8  |
| CA2,CARD16,F2RL1,FGL2,GZMA,HSP90AB1,LCN2,LTB,OLFM4,PI3,SEMA4D,SL        | 15 |
| CASP1,IRF1 (includes EG:16362),LCK,LEF1,MX1,STAT1                       | 6  |
| AK1,CD274,GAS2L1,IGHM,LCK,LEF1,PI3,PRKCH,STAT1                          | 9  |
| BAG1,CAMK1D,DDX58,DDX60L,HERC5,IRF1 (includes EG:16362),LEF1,MDFIC,MA   | 12 |
| LCK,PECAM1,PTGER4                                                       | 3  |
| LCK,PECAM1,PTGER4                                                       | 3  |
| LCK,PECAM1,PTGER4                                                       | 3  |
| LCK,PECAM1,PTGER4                                                       | 3  |
| LCK,PECAM1,PTGER4                                                       | 3  |
| DDX58,LCK,RARRES3                                                       | 3  |
| CD274,HLA-DQA1,IGHM,IL7R,LCN2,PECAM1,RASGRP1,SEMA4D                     | 8  |
| CD274,HLA-DQA1,IGHM,IL7R,LCN2,PECAM1,RASGRP1,SEMA4D                     | 8  |
| CD274,HLA-DQA1,IGHM,IL7R,LCN2,PECAM1,RASGRP1,SEMA4D                     | 8  |
| CX3CR1,HLA-DQA1                                                         | 2  |
| ALOX12,LCN2                                                             | 2  |
| ALOX12,LCN2                                                             | 2  |
| ALOX12,CASP1,GIMAP4,LEF1                                                | 4  |
| GBP1,GBP2 (includes EG:14468),HSP90AB1,IRF1 (includes EG:16362),LCK,PEC | 9  |
| GBP1,GBP2 (includes EG:14468),HSP90AB1,IRF1 (includes EG:16362),LCK,PEC | 9  |
| BCL11B,CD274,DDX58,EPB42,HLA-DQA1,HLA-DQB1,IGHM,IRF1 (includes EG:16    | 15 |
| BCL11B,F2RL1,ITGA4,LTB                                                  | 4  |
| BCL11B,F2RL1,ITGA4,LTB                                                  | 4  |
| BCL11B,F2RL1,ITGA4,LTB                                                  | 4  |
| BCL11B,F2RL1,ITGA4,LTB                                                  | 4  |
| HSP90AB1,IGHM,LY75,UBE2L6                                               | 4  |
| HSP90AB1,IGHM,LY75,UBE2L6                                               | 4  |



|                                                                          |   |
|--------------------------------------------------------------------------|---|
| IGHM,LTB,SLPI,STAT1                                                      | 4 |
| HLA-DQB1,IGHM                                                            | 2 |
| HLA-DQB1,IGHM                                                            | 2 |
| HSP90AB1,STAT1                                                           | 2 |
| CD274,GIMAP4                                                             | 2 |
| CD274,IGHM,IL7R,LCN2,LTB,PECAM1,ZFP36L2                                  | 7 |
| CD274,IGHM,IL7R,LCN2,LTB,PECAM1,ZFP36L2                                  | 7 |
| IGHM,IL7R,RASGRP1,TAP2                                                   | 4 |
| CAMK1D,CLEC7A,F2RL1,FCGR3B,LY75,PECAM1,PF4                               | 7 |
| CAMK1D,CLEC7A,F2RL1,FCGR3B,LY75,PECAM1,PF4                               | 7 |
| CAMK1D,CLEC7A,F2RL1,FCGR3B,LY75,PECAM1,PF4                               | 7 |
| CASP1,CD274,CLEC7A,HLA-DQB1,IL7R,IRF1 (includes EG:16362)                | 6 |
| CASP1,IRF1 (includes EG:16362),STAT1                                     | 3 |
| BCL11B,CD52,IL7R,IRF1 (includes EG:16362),ITGA4,LCK,POLB                 | 7 |
| CD274,IRF1 (includes EG:16362),LEF1,STAT1                                | 4 |
| CD274,IRF1 (includes EG:16362),LEF1,STAT1                                | 4 |
| CD274,IRF1 (includes EG:16362),LEF1,STAT1                                | 4 |
| CD274,IRF1 (includes EG:16362),LEF1,STAT1                                | 4 |
| CD274,IRF1 (includes EG:16362),LEF1,STAT1                                | 4 |
| CD274,IRF1 (includes EG:16362),LEF1,STAT1                                | 4 |
| CD274,IRF1 (includes EG:16362),LEF1,STAT1                                | 4 |
| CD274,GZMA,MME,PECAM1                                                    | 4 |
| CD274,GZMA,MME,PECAM1                                                    | 4 |
| CD274,GZMA,MME,PECAM1                                                    | 4 |
| CD274,GZMA,MME,PECAM1                                                    | 4 |
| DDX58,IRF1 (includes EG:16362),STAT1                                     | 3 |
| DDX58,IRF1 (includes EG:16362),STAT1                                     | 3 |
| GBP1,GBP2 (includes EG:14468),HSP90AB1,IRF1 (includes EG:16362),LCK,PEC, | 7 |
| GBP1,GBP2 (includes EG:14468),HSP90AB1,IRF1 (includes EG:16362),LCK,PEC, | 7 |
| CX3CR1,LCK                                                               | 2 |
| CX3CR1,LCK                                                               | 2 |
| CX3CR1,LCK                                                               | 2 |
| CX3CR1,LCK                                                               | 2 |
| CX3CR1,LCK                                                               | 2 |
| CX3CR1,LCK                                                               | 2 |
| IRF1 (includes EG:16362),KCNJ2                                           | 2 |
| CX3CR1,LRRK2,SEMA4D                                                      | 3 |
| CX3CR1,LRRK2,SEMA4D                                                      | 3 |
| CX3CR1,LRRK2,SEMA4D                                                      | 3 |
| CX3CR1,LRRK2,SEMA4D                                                      | 3 |
| BCL11B,IL7R,POLB                                                         | 3 |
| BCL11B,IL7R,POLB                                                         | 3 |
| BCL11B,IL7R,POLB                                                         | 3 |
| HLA-DQB1,IGHM,IL7R,LTB                                                   | 4 |
| HLA-DQB1,IGHM,IL7R,LTB                                                   | 4 |
| HLA-DQB1,IGHM,IL7R,LTB                                                   | 4 |
| HLA-DQB1,IGHM,IL7R,LTB                                                   | 4 |
| HLA-DQB1,IGHM,IL7R,LTB                                                   | 4 |
| ITGA4,PECAM1,PPBP,SLPI                                                   | 4 |
| ITGA4,PECAM1,PPBP,SLPI                                                   | 4 |
| ITGA4,PECAM1,PPBP,SLPI                                                   | 4 |
| ITGA4,PECAM1,PPBP,SLPI                                                   | 4 |
| ALOX12,BAG1,HSPB1,POLB,SEMA4D,SNCA                                       | 6 |

|                                                                       |   |
|-----------------------------------------------------------------------|---|
| CD274,F2RL1,HLA-DQB1,IGHM,LCK,LTB,RASGRP1                             | 7 |
| CD274,F2RL1,HLA-DQB1,IGHM,LCK,LTB,RASGRP1                             | 7 |
| ALOX12,HSPB1,IRF1 (includes EG:16362),LCN2                            | 4 |
| ALOX12,HSPB1,IRF1 (includes EG:16362),LCN2                            | 4 |
| ALOX12,HSPB1,IRF1 (includes EG:16362),LCN2                            | 4 |
| CX3CR1,F2RL1,IGHM,IRF1 (includes EG:16362),LCN2,LTB,PDE4B,PI3,ZFP36L2 | 9 |
| CX3CR1,F2RL1,IGHM,IRF1 (includes EG:16362),LCN2,LTB,PDE4B,PI3,ZFP36L2 | 9 |
| CX3CR1,F2RL1,IGHM,IRF1 (includes EG:16362),LCN2,LTB,PDE4B,PI3,ZFP36L2 | 9 |
| CD274,SLAMF7,STAT1                                                    | 3 |
| CASP1,CX3CR1,F2RL1,SNCA,STAT1                                         | 5 |
| CASP1,CX3CR1,F2RL1,SNCA,STAT1                                         | 5 |
| IL7R,STAT1                                                            | 2 |
| IL7R,STAT1                                                            | 2 |
| F2RL1,IL32                                                            | 2 |
| F2RL1,IL32                                                            | 2 |
| F2RL1,IL32                                                            | 2 |
| HLA-DQB1,IGHM,LTB                                                     | 3 |
| DDX58,IL7R,LTB                                                        | 3 |
| DDX58,IL7R,LTB                                                        | 3 |
| DDX58,IL7R,LTB                                                        | 3 |
| DDX58,IL7R,LTB                                                        | 3 |
| ITGA4,PECAM1,PPBP                                                     | 3 |
| ITGA4,PECAM1,PPBP                                                     | 3 |
| CASP1,EPB42,ITGA4,LRRK2,MME,PDE4B,SNCA                                | 7 |
| BCL11B,HLA-DQB1,IL7R,IRF1 (includes EG:16362),LCK,RASGRP1             | 6 |
| BCL11B,HLA-DQB1,IL7R,IRF1 (includes EG:16362),LCK,RASGRP1             | 6 |
| BCL11B,HLA-DQB1,IL7R,IRF1 (includes EG:16362),LCK,RASGRP1             | 6 |
| CD274,IL7R,RASGRP1                                                    | 3 |
| CD274,IL7R,RASGRP1                                                    | 3 |
| CD274,IL7R,RASGRP1                                                    | 3 |
| CD274,IGHM,LCK,LTB                                                    | 4 |
| CD274,IGHM,LCK,LTB                                                    | 4 |
| CD46,IRF1 (includes EG:16362),PI3,POLB,STAT1                          | 5 |
| BCL11B,IGHM,IL7R,LCK                                                  | 4 |
| BCL11B,IGHM,IL7R,LCK                                                  | 4 |
| BCL11B,ITGA4,LEF1                                                     | 3 |
| BCL11B,ITGA4,LEF1                                                     | 3 |
| LCK,PPBP,SEMA4D                                                       | 3 |
| LCK,PPBP,SEMA4D                                                       | 3 |
| LCK,PPBP,SEMA4D                                                       | 3 |
| BCL11B,IGHM,IL7R,IRF1 (includes EG:16362),PECAM1                      | 5 |
| BCL11B,IGHM,IL7R,IRF1 (includes EG:16362),PECAM1                      | 5 |
| BCL11B,IGHM,IL7R,IRF1 (includes EG:16362),PECAM1                      | 5 |
| CASP1,CX3CR1,LRRK2,LTB,PF4,RETN,SEMA4D                                | 7 |
| CASP1,CX3CR1,LRRK2,LTB,PF4,RETN,SEMA4D                                | 7 |
| CASP1,CX3CR1,LRRK2,LTB,PF4,RETN,SEMA4D                                | 7 |
| CASP1,CX3CR1,LRRK2,LTB,PF4,RETN,SEMA4D                                | 7 |
| BCL11B,CASP1,GIMAP4,GZMA,LCN2                                         | 5 |
| ITGA4,LY75,RORA,SELENBP1,SLPI                                         | 5 |
| ITGA4,LY75,RORA,SELENBP1,SLPI                                         | 5 |
| FCGR3B,GZMA,LCK,STAT1,TAP2                                            | 5 |
| IGHM,IL7R,ITGA4,RORA                                                  | 4 |

|                                                                                  |    |
|----------------------------------------------------------------------------------|----|
| IGHM,IL7R,ITGA4,RORA                                                             | 4  |
| IGHM,IL7R,ITGA4,RORA                                                             | 4  |
| IGHM,IL7R,ITGA4,RORA                                                             | 4  |
| IGHM,IL7R,ITGA4,RORA                                                             | 4  |
| BCL11B,F2RL1,ITGA4,LTB,PF4                                                       | 5  |
| BCL11B,F2RL1,ITGA4,LTB,PF4                                                       | 5  |
| BCL11B,F2RL1,ITGA4,LTB,PF4                                                       | 5  |
| IGHM,LCK                                                                         | 2  |
| IGHM,LCK                                                                         | 2  |
| IL7R,LCK                                                                         | 2  |
| IL7R,LCK                                                                         | 2  |
| IL7R,LCK                                                                         | 2  |
| IL7R,LCK                                                                         | 2  |
| IL7R,LCK                                                                         | 2  |
| IL7R,LCK                                                                         | 2  |
| IL7R,LCK                                                                         | 2  |
| F2RL1,SNCA                                                                       | 2  |
| F2RL1,SNCA                                                                       | 2  |
| F2RL1,SNCA                                                                       | 2  |
| DDX58,RARRES3                                                                    | 2  |
| IRF1 (includes EG:16362),LCN2,PRKCH,STAT1                                        | 4  |
| CASP1,F2RL1,GZMA,STAT1                                                           | 4  |
| F2RL1,HEMGN,IFIT2,MS4A4A                                                         | 4  |
| IRF1 (includes EG:16362),PPBP,STAT1,TAP2                                         | 4  |
| IRF1 (includes EG:16362),PPBP,STAT1,TAP2                                         | 4  |
| IRF1 (includes EG:16362),PPBP,STAT1,TAP2                                         | 4  |
| ANKRD9,CA2,CAMK1D,CARD16,CD46,DDX58,DDX60L,LCN2,PKN2,STAT1                       | 10 |
| ANKRD9,CA2,CAMK1D,CARD16,CD46,DDX58,DDX60L,LCN2,PKN2,STAT1                       | 10 |
| CASP1,HSP90AB1,PF4,PTGER4                                                        | 4  |
| BCL11B,IL7R,IRF1 (includes EG:16362),LCK                                         | 4  |
| BCL11B,IL7R,IRF1 (includes EG:16362),LCK                                         | 4  |
| BCL11B,IL7R,IRF1 (includes EG:16362),LCK                                         | 4  |
| AK1,BCL11B,BTN3A1,CA2,CASP1,GBP1,MAN1A1,OSBPL8,PSMB9,RARRES3,STAT1               | 11 |
| AK1,BCL11B,BTN3A1,CA2,CASP1,GBP1,MAN1A1,OSBPL8,PSMB9,RARRES3,STAT1               | 11 |
| AK1,BCL11B,BTN3A1,CA2,CASP1,GBP1,MAN1A1,OSBPL8,PSMB9,RARRES3,STAT1               | 11 |
| HLA-DQB1,ITGA4,PSMB9,RORA                                                        | 4  |
| HLA-DQB1,ITGA4,PSMB9,RORA                                                        | 4  |
| HLA-DQB1,ITGA4,PSMB9,RORA                                                        | 4  |
| AK1,BCL11B,BTN3A1,CA2,CASP1,GBP1,MAN1A1,MME,OSBPL8,PSMB9,RARRES3,STAT1           | 12 |
| F2RL1,FCGR3B,PECAM1,PF4,PILRA,PPBP                                               | 6  |
| F2RL1,FCGR3B,PECAM1,PF4,PILRA,PPBP                                               | 6  |
| LCK,PECAM1                                                                       | 2  |
| LCK,PECAM1                                                                       | 2  |
| LCK,PECAM1                                                                       | 2  |
| LCK,PECAM1                                                                       | 2  |
| LCK,PECAM1                                                                       | 2  |
| IL7R,LTB                                                                         | 2  |
| IL7R,LTB                                                                         | 2  |
| IL7R,LTB                                                                         | 2  |
| IL7R,LTB                                                                         | 2  |
| CASP1,HLA-DQB1,IGHM,LTB,RASGRP1                                                  | 5  |
| GBP1,GBP2 (includes EG:14468),HSP90AB1,IRF1 (includes EG:16362),LCK,PECAM1,STAT1 | 8  |
| GBP1,GBP2 (includes EG:14468),HSP90AB1,IRF1 (includes EG:16362),LCK,PECAM1,STAT1 | 8  |

|                                                                      |    |
|----------------------------------------------------------------------|----|
| ITGA4,LCK,PPBP,SEMA4D                                                | 4  |
| ITGA4,LCK,PPBP,SEMA4D                                                | 4  |
| ITGA4,LCK,PPBP,SEMA4D                                                | 4  |
| ALOX12,BAG1,CASP1,DDX58,HSP90AB1,HSPB1,IGHM,IL32,IRF1 (includes EG:1 | 20 |
| F2RL1,LCN2,PF4,SLPI                                                  | 4  |
| F2RL1,LCN2,PF4,SLPI                                                  | 4  |
| F2RL1,LCN2,PF4,SLPI                                                  | 4  |
| F2RL1,LCN2,PF4,SLPI                                                  | 4  |
| CA2,CASP1,CLEC7A,F2RL1,FCGR3B,IGHM,PECAM1,PPBP,PRKCH,PTGER4,SC       | 11 |
| CLEC7A,F2RL1,IRF1 (includes EG:16362),RARRES3,STAT1                  | 5  |
| CLEC7A,F2RL1,IRF1 (includes EG:16362),RARRES3,STAT1                  | 5  |
| IGHM,PECAM1                                                          | 2  |
| IGHM,PECAM1                                                          | 2  |
| IGHM,PECAM1                                                          | 2  |
| DDX58,IRF1 (includes EG:16362)                                       | 2  |
| CASP1,CD274,HLA-DQB1,IL7R                                            | 4  |
| CASP1,CD274,HLA-DQB1,IL7R                                            | 4  |
| ALOX12,BAG1,CASP1,DDX58,HSP90AB1,HSPB1,IGHM,IL32,IRF1 (includes EG:1 | 23 |
| AK1,BCL11B,BTN3A1,CA2,CASP1,GBP1,HSPB1,LRRK2,MAN1A1,OSBPL8,PDE4      | 16 |
| F2RL1,PECAM1,PTGER4                                                  | 3  |
| F2RL1,PECAM1,PTGER4                                                  | 3  |
| BCL11B,CASP1,CD274,HLA-DQA1,HLA-DQB1,SELENBP1                        | 6  |
| CASP1,IRF1 (includes EG:16362)                                       | 2  |
| CASP1,IRF1 (includes EG:16362)                                       | 2  |
| PF4,PPBP                                                             | 2  |
| PF4,PPBP                                                             | 2  |
| PF4,PPBP                                                             | 2  |
| PF4,PPBP                                                             | 2  |
| PF4,PPBP                                                             | 2  |
| PF4,PPBP                                                             | 2  |
| F2RL1,SNCA                                                           | 2  |
| KCNJ2                                                                | 1  |
| KCNJ2                                                                | 1  |
| KCNJ2                                                                | 1  |
| LCN2                                                                 | 1  |
| LCN2                                                                 | 1  |
| F2RL1,HLA-DQB1,IGHM,ITGA4,LRRK2,PDE4B                                | 6  |
| F2RL1,HLA-DQB1,IGHM,ITGA4,LRRK2,PDE4B                                | 6  |
| F2RL1,HLA-DQB1,IGHM,ITGA4,LRRK2,PDE4B                                | 6  |
| F2RL1,HLA-DQB1,IGHM,ITGA4,LRRK2,PDE4B                                | 6  |
| F2RL1,HLA-DQB1,IGHM,ITGA4,LRRK2,PDE4B                                | 6  |
| CASP1,CD274,LTB,PDE4B,PF4,POLB                                       | 6  |
| CASP1,CD274,LTB,PDE4B,PF4,POLB                                       | 6  |
| CASP1,CD274,LTB,PDE4B,PF4,POLB                                       | 6  |
| CASP1,CD274,LTB,PDE4B,PF4,POLB                                       | 6  |
| LTB                                                                  | 1  |
| LTB                                                                  | 1  |
| LTB                                                                  | 1  |
| LCN2                                                                 | 1  |
| LCN2                                                                 | 1  |
| LCN2                                                                 | 1  |
| LCN2                                                                 | 1  |
| CASP1,LRRK2                                                          | 2  |

|                             |   |
|-----------------------------|---|
| CASP1,LRRK2                 | 2 |
| PDE4B,PF4                   | 2 |
| PDE4B,PF4                   | 2 |
| PDE4B,PF4                   | 2 |
| PDE4B,PF4                   | 2 |
| KCNJ2                       | 1 |
| KCNJ2                       | 1 |
| KCNJ2                       | 1 |
| BAG1,CASP1,HSPB1,LCN2,STAT1 | 5 |
| BAG1,CASP1,HSPB1,LCN2,STAT1 | 5 |
| CD274,POLB                  | 2 |
| CD274,POLB                  | 2 |
| CD274,POLB                  | 2 |
| CD274,POLB                  | 2 |
| CD274,POLB                  | 2 |
| PECAM1                      | 1 |
| PECAM1                      | 1 |
| ITGA4                       | 1 |
| ITGA4                       | 1 |
| ITGA4                       | 1 |
| HLA-DQB1                    | 1 |
| HLA-DQB1                    | 1 |
| HLA-DQB1                    | 1 |
| HLA-DQB1                    | 1 |
| HLA-DQB1                    | 1 |
| LCN2                        | 1 |
| LCN2                        | 1 |
| LCN2                        | 1 |
| LCN2                        | 1 |
| IGHM                        | 1 |
| IGHM                        | 1 |
| IGHM                        | 1 |
| IGHM                        | 1 |
| IGHM                        | 1 |
| BAG1,CASP1,LCN2,STAT1       | 4 |
| BAG1,CASP1,LCN2,STAT1       | 4 |
| CASP1,TNS1                  | 2 |
| CASP1,TNS1                  | 2 |
| CASP1,TNS1                  | 2 |
| LTB,PSMB9                   | 2 |
| LTB,PSMB9                   | 2 |
| LTB,PSMB9                   | 2 |
| LTB,PSMB9                   | 2 |
| LTB,PSMB9                   | 2 |
| CD274,LTB,POLB              | 3 |
| CD274,LTB,POLB              | 3 |
| CD274,LTB,POLB              | 3 |
| CD274,LTB,POLB              | 3 |
| F2RL1,STAT1                 | 2 |
| F2RL1,STAT1                 | 2 |
| F2RL1,STAT1                 | 2 |
| F2RL1,STAT1                 | 2 |

|             |   |
|-------------|---|
| F2RL1,STAT1 | 2 |
| F2RL1,STAT1 | 2 |
| LCN2        | 1 |
| LCN2        | 1 |
